1 **Deep transcriptome annotation suggests that small and large proteins encoded in**  
2 **the same genes often cooperate**

3

4 Sondos Samandi<sup>1,7†</sup>, Annie V. Roy<sup>1,7†</sup>, Vivian Delcourt<sup>1,7,8</sup>, Jean-François Lucier<sup>2</sup>, Jules  
5 Gagnon<sup>2</sup>, Maxime C. Beaudoin<sup>1,7</sup>, Benoît Vanderperre<sup>1</sup>, Marc-André Breton<sup>1</sup>, Julie  
6 Motard<sup>1,7</sup>, Jean-François Jacques<sup>1,7</sup>, Mylène Brunelle<sup>1,7</sup>, Isabelle Gagnon-Arsenault<sup>6,7</sup>,  
7 Isabelle Fournier<sup>8</sup>, Aida Ouangraoua<sup>3</sup>, Darel J. Hunting<sup>4</sup>, Alan A. Cohen<sup>5</sup>, Christian R.  
8 Landry<sup>6,7</sup>, Michelle S. Scott<sup>1</sup>, Xavier Roucou<sup>1,7\*</sup>

9

10 <sup>1</sup>Department of Biochemistry, <sup>2</sup>Department of Biology and Center for Computational  
11 Science, <sup>3</sup>Department of Computer Science, <sup>4</sup>Department of Nuclear Medicine &  
12 Radiobiology, <sup>5</sup>Department of Family Medicine, Université de Sherbrooke, Quebec,  
13 Canada; <sup>6</sup>Département de biologie and IBIS, Université Laval, Quebec, Canada;  
14 <sup>7</sup>PROTEO, Quebec Network for Research on Protein Function, Structure, and  
15 Engineering, Quebec, Canada; <sup>8</sup>Univ. Lille, INSERM U1192, Laboratoire Protéomique,  
16 Réponse Inflammatoire & Spectrométrie de Masse (PRISM) F-59000 Lille, France

17

18 †These authors contributed equally to this work

19 \*Correspondance to Xavier Roucou: Department of Biochemistry (Z8-2001), Faculté de  
20 Médecine et des Sciences de la Santé, Université de Sherbrooke, 3201 Jean Mignault,  
21 Sherbrooke, Quebec J1E 4K8, Canada, Tel. (819) 821-8000x72240; Fax. (819) 820 6831;  
22 E-Mail: [xavier.roucou@usherbrooke.ca](mailto:xavier.roucou@usherbrooke.ca)

23

24 **Abstract**

25

26 Recent studies in eukaryotes have demonstrated the translation of alternative open  
27 reading frames (altORFs) in addition to annotated protein coding sequences (CDSs). We  
28 show that a large number of small proteins could in fact be coded by altORFs. The  
29 putative alternative proteins translated from altORFs have orthologs in many species and  
30 evolutionary patterns indicate that altORFs are particularly constrained in CDSs that  
31 evolve slowly. Thousands of predicted alternative proteins are detected in proteomic  
32 datasets by reanalysis with a database containing predicted alternative proteins. Protein  
33 domains and co-conservation analyses suggest potential functional cooperation or shared  
34 function between small and large proteins encoded in the same genes. This is illustrated  
35 with specific examples, including altMID51, a 70 amino acid mitochondrial fission-  
36 promoting protein encoded in MiD51/Mief1/SMCR7L, a gene encoding an annotated  
37 protein promoting mitochondrial fission. Our results suggest that many coding genes  
38 code for more than one protein that are often functionally related.

39

40

## 41 **Introduction**

42 Current protein databases are cornerstones of modern biology but are based on a number  
43 of assumptions. In particular, a mature mRNA is predicted to contain a single CDS; yet,  
44 ribosomes can select more than one translation initiation site (TIS)<sup>1-3</sup> on any single  
45 mRNA. Also, minimum size limits are imposed on the length of CDSs, resulting in many  
46 RNAs being mistakenly classified as non-coding (ncRNAs)<sup>4-11</sup>. As a result of these  
47 assumptions, the size and complexity of most eukaryotic proteomes have probably been  
48 greatly underestimated<sup>12-15</sup>. In particular, few small proteins (defined as of 100 amino  
49 acids or less) are annotated in current databases. The absence of annotation of small  
50 proteins is a major bottleneck in the study of their function and to a full understanding of  
51 cell biology in health and disease. This is further supported by classical and recent  
52 examples of small proteins of functional importance, for instance many critical regulatory  
53 molecules such as F0 subunits of the F0F1-ATP synthase<sup>16</sup>, the sarcoplasmic reticulum  
54 calcium ATPase regulator phospholamban<sup>17</sup>, and the key regulator of iron homeostasis  
55 hepcidin<sup>18</sup>. This limitation also impedes our understanding of the process of origin of  
56 genes *de novo*, which are thought to contribute to evolutionary innovations. Because  
57 these genes generally code for small proteins<sup>19-22</sup>, they are difficult to detect by  
58 proteomics or even impossible to detect if they are not included in proteomics databases.  
59  
60 Functional annotation of ORFs encoding small proteins is particularly challenging since  
61 an unknown fraction of small ORFs may occur by chance in the transcriptome,  
62 generating a significant level of noise<sup>13</sup>. However, given that many small proteins have

63 important functions and are ultimately one of the most important sources of functional  
64 novelty, it is time to address the challenge of their functional annotations<sup>13</sup>.

65

66 We systematically reanalyzed several eukaryotic transcriptomes to annotate previously  
67 unannotated ORFs which we term alternative ORFs (altORFs), and we annotated the  
68 corresponding hidden proteome. Here, altORFs are defined as potential protein-coding  
69 ORFs in ncRNAs or exterior to, or in different reading frames from annotated CDSs in  
70 mRNAs (Figure 1a). For clarity, predicted proteins translated from altORFs are termed  
71 alternative proteins and proteins translated from annotated CDSs are termed reference  
72 proteins.

73

74 Our goal was to provide functional annotations of alternative proteins by (1) analyzing  
75 relative patterns of evolutionary conservation between alternative and reference proteins  
76 and their corresponding coding sequences;(2) estimating the prevalence of alternative  
77 proteins both by bioinformatics analysis and by detection in large experimental datasets;  
78 (3) detecting functional signatures in alternative proteins; and (4) predicting and testing  
79 functional cooperation between alternative and reference proteins.

80

## 81 **Results**

82 **Prediction of altORFs and alternative proteins.** We predicted a total of 551,380  
83 altORFs compared to 67,765 annotated CDSs in the human transcriptome (Figure 1b,  
84 Table 1). Because identical ORFs can be present in different RNA isoforms transcribed  
85 from the same genomic locus, the number of unique altORFs and CDSs becomes 183,191

86 and 51,818, respectively. AltORFs were also predicted in other organisms for comparison  
87 (Table 1). By convention, only reference proteins are annotated in current protein  
88 databases. As expected, these altORFs are on average small, with a size ranging from 30  
89 to 1480 codons. Accordingly, the median size of human predicted alternative proteins is  
90 45 amino acids compared to 460 for reference proteins (Figure 1c), and 92.96 % of  
91 alternative proteins have less than 100 amino acids. Thus, the bulk of the translation  
92 products of altORFs would be small proteins. The majority of altORFs either overlap  
93 annotated CDSs in a different reading frame (35.98%) or are located in 3'UTRs (40.09%)  
94 (Figure 1d). Only about 10% of altORFs are located in repeat sequences (Figure 1-figure  
95 supplement 1). To assess whether observed altORFs could be attributable solely to  
96 random occurrence, due for instance to the base composition of the transcriptome, we  
97 estimated the expected number of altORFs generated in 100 shuffled human  
98 transcriptomes. Overall, we observed 62,307 more altORFs than would be expected from  
99 random occurrence alone (Figure 1e;  $p < 0.0001$ ). This analysis suggests that a large  
100 number are expected by chance alone but that at the same time, a large absolute number  
101 could potentially be maintained and be functional. The density of altORFs observed in  
102 the CDSs, 3'UTRs and ncRNAs (Figure 1f) was markedly higher than in the shuffled  
103 transcriptomes, suggesting that these are maintained at frequency higher than expected by  
104 chance, again potentially due to their coding function. In contrast, the density of altORFs  
105 observed in 5'UTRs was much lower than in the shuffled transcriptomes, supporting  
106 recent claims that negative selection eliminates AUGs (and thus the potential for the  
107 evolution of altORFs) in these regions<sup>23,24</sup>.  
108

109 Although the majority of human annotated CDSs do not have a TIS with a Kozak motif  
110 (Figure 1g)<sup>25</sup>, there is a correlation between a Kozak motif and translation efficiency<sup>26</sup>.  
111 We find that 27,539 (15% of 183,191) human altORFs encoding predicted alternative  
112 proteins have a Kozak motif, as compared to 19,745 (38% of 51,818) for annotated CDSs  
113 encoding reference proteins (Figure 1g). The number of altORFs with Kozak motifs is  
114 significantly higher in the human transcriptome compared to shuffled transcriptomes  
115 (Figure 1-figure supplement 2), again supporting their potential role as protein coding.

116

117 **Conservation analyses.** Next, we compared evolutionary conservation patterns of  
118 altORFs and CDSs. A large number of human alternative proteins have homologs in other  
119 species. In mammals, the number of homologous alternative proteins is higher than the  
120 number of homologous reference proteins (Figure 2a), and 9 are even conserved from  
121 human to yeast (Figure 2b), supporting a potential functional role. As phylogenetic  
122 distance from human increases, the number and percentage of genes encoding  
123 homologous alternative proteins decreases more rapidly than the percentage of genes  
124 encoding reference proteins (Figure 2a, 2c). This observation indicates either that  
125 altORFs evolve more rapidly than CDSs or that distant homologies are less likely to be  
126 detected given the smaller sizes of alternative proteins. Another possibility is that they  
127 evolve following the patterns of evolution of genes that evolve *de novo*, with a rapid birth  
128 and death rate, which accelerates their turnover over time<sup>20</sup>.

129

130 If altORFs play a functional role, they would be expected to be under purifying selection.  
131 The first and second positions of a codon experience stronger purifying selection than the

132 third<sup>27</sup>. By definition, CDS regions overlapping altORFs with a shifted reading frame do  
133 not contain such third positions because the third codon positions of the CDSs are either  
134 the first or the second in the altORFs. We analyzed conservation of third codon positions  
135 of CDSs for 100 vertebrate species for the 53,862 altORFs completely nested within the  
136 20,814 CDSs from 14,677 genes (Figure 3). We observed that in regions of the CDS  
137 overlapping altORFs, third codon positions were evolving significantly more slowly than  
138 third codon positions of random control sequences from the entire CDS for a large  
139 number of altORFs (Figure 3), reaching up to 22-fold for conservation at  $p < 0.0001$ . This  
140 is illustrated with three altORFs located within the CDS of NTNG1, RET and VTI1A  
141 genes (Figure 4). These three genes encode a protein promoting neurite outgrowth, the  
142 proto-oncogene tyrosine-protein kinase receptor Ret and a protein mediating vesicle  
143 transport to the cell surface, respectively. Two of these alternative proteins have been  
144 detected by ribosome profiling (RET, IP\_182668.1) or mass spectrometry (VTI1A,  
145 IP\_188229.1) (see below, supplementary files 1 and 2).

146

147 **Evidence of expression of alternative proteins.** We provide two lines of evidence  
148 indicating that thousands of altORFs are translated into proteins. First, we re-analyzed  
149 detected TISs in publicly available ribosome profiling data<sup>28,29</sup>, and found 26,531 TISs  
150 mapping to annotated CDSs and 12,616 mapping to altORFs in these studies (Figure 5a;  
151 Supplementary file 1). Although predicted altORFs<sup>3'</sup> are more abundant than altORFs<sup>5'</sup>,  
152 only a small fraction of TISs detected by ribosomal profiling mapped to altORFs<sup>3'</sup>. Only a  
153 small fraction of TISs detected by ribosomal profiling mapped to altORFs<sup>3'</sup> even if those  
154 are more abundant than altORF<sup>5'</sup> relative to shuffled transcriptomes, likely reflecting a

155 recently-resolved technical issue in the ribosome profiling technique<sup>30</sup>. New methods to  
156 analyze ribosome profiling data are being developed and will likely uncover more  
157 translated altORFs<sup>9</sup>. In agreement with the presence of functional altORFs<sup>37</sup>, cap-  
158 independent translational sequences were recently discovered in human 3'UTRs<sup>31</sup>. New  
159 methods to analyze ribosome profiling data are being developed and will likely uncover  
160 more translated altORFs<sup>9</sup>. Second, we re-analyzed proteomic data using our composite  
161 database containing alternative proteins in addition to annotated reference proteins  
162 (Figure 5b, Supplementary file 2). False discovery rate cut-offs were set at 1% for  
163 peptide-spectrum match, peptides and proteins. We selected four studies representing  
164 different experimental paradigms and proteomic applications: large-scale<sup>32</sup> and targeted  
165<sup>33</sup> protein/protein interactions, post-translational modifications<sup>34</sup>, and a combination of  
166 bottom-up, shotgun and interactome proteomics<sup>35</sup> (Figure 5b). In the first dataset, we  
167 detected 7,530 predicted alternative proteins in the interactome of reference proteins<sup>32</sup>,  
168 providing a framework to uncover the function of these proteins. In a second proteomic  
169 dataset containing about 10,000 reference human proteins<sup>35</sup>, a total of 1,658 predicted  
170 alternative proteins were detected, representing more than 10% of the detectable  
171 proteome. Using a phosphoproteomic large data set<sup>34</sup>, we detected 1,424 alternative  
172 proteins. The biological function of these proteins is supported by the observation that  
173 some alternative proteins are specifically phosphorylated in cells stimulated by the  
174 epidermal growth factor, and others are specifically phosphorylated during mitosis  
175 (Figure 6; Supplementary file 3). We provide examples of spectra validation using  
176 synthetic peptides (Figure 6-figure supplement 1-2). A fourth proteomic dataset contained  
177 113 alternative proteins in the epidermal growth factor receptor interactome<sup>33</sup> (Figure



178 5b). A total of 10,362 different alternative proteins were detected in these proteomic data.  
179 Overall, by mining the proteomic and ribosomal profiling data, we detected the  
180 translation of a total of 22,155 unique alternative proteins. 823 of these alternative  
181 proteins were detected by both MS and ribosome profiling (Figure 7), providing a high-  
182 confidence collection of nearly one thousand small alternative proteins for further studies.

183

184 **Functional annotations of alternative proteins.** An important goal of this study is to  
185 associate potential functions to alternative proteins, which we can do through  
186 annotations. Because the sequence similarities and the presence of particular signatures  
187 (families, domains, motifs, sites) are a good indicator of a protein's function, we analyzed  
188 the sequence of the predicted alternative proteins in several organisms with InterProScan,  
189 an analysis and classification tool for characterizing unknown protein sequences by  
190 predicting the presence of combined protein signatures from most main domain  
191 databases<sup>36</sup> (Figure 8; Figure 8-figure supplement 1). We found 41,511 (23%) human  
192 alternative proteins with at least one InterPro signature (Figure 8b). Of these, 37,739 (or  
193 20.6%) are classified as small proteins. Interestingly, the reference proteome has a  
194 smaller proportion (840 or 1.6%) of small proteins with at least one InterPro signature,  
195 supporting a biological activity for alternative proteins.

196 Similar to reference proteins, signatures linked to membrane proteins are abundant in the  
197 alternative proteome and represent more than 15,000 proteins (Figure 8c-e; Figure 8-  
198 supplemental figure 1). With respect to the targeting of proteins to the secretory pathway  
199 or to cellular membranes, the main difference between the alternative and the reference  
200 proteomes lies in the very low number of proteins with both signal peptides and

201 transmembrane domains. Most of the alternative proteins with a signal peptide do not  
202 have a transmembrane segment and are predicted to be secreted (Figure 8c, d), supporting  
203 the presence of large numbers of alternative proteins in plasma<sup>37</sup>. The majority of  
204 predicted alternative proteins with transmembrane domains have a single membrane  
205 spanning domain but some display up to 27 transmembrane regions, which is still within  
206 the range of reference proteins that show a maximum of 33 (Figure 8e).

207 A total of 585 alternative proteins were assigned 419 different InterPro entries, and 343 of  
208 them were tentatively assigned 192 gene ontology terms (Figure 9). 17.1% (100/585) of  
209 alternative proteins with an InterPro entry were detected by MS or/and ribosome  
210 profiling, compared to 13.7% (22,055/161,110) for alternative proteins without an  
211 InterPro entry. Thus, predicted alternative proteins with InterPro entries are more likely to  
212 be detected, supporting their functional role ( $p$ -value = 0.000035, Fisher's exact test and  
213 chi-square test). The most abundant class of predicted alternative proteins with at least  
214 one InterPro entry are C2H2 zinc finger proteins with 110 alternative proteins containing  
215 187 C2H2-type/integrase DNA-binding domains, 91 C2H2 domains and 23 C2H2-like  
216 domains (Figure 10a). Seventeen of these (15.4%) were detected in public proteomic and  
217 ribosome profiling datasets, a percentage that is similar to reference zinc finger proteins  
218 (20.1%) (Figure 2, Table 2). Alternative proteins have between 1 and 23 zinc finger  
219 domains (Figure 10b). Zinc fingers mediate protein-DNA, protein-RNA and protein-  
220 protein interactions<sup>38</sup>. The linker sequence separating adjacent finger motifs matches or  
221 resembles the consensus TGEK sequence in nearly half the annotated zinc finger  
222 proteins<sup>39</sup>. This linker confers high affinity DNA binding and switches from a flexible to  
223 a rigid conformation to stabilize DNA binding. The consensus TGEK linker is present 46

224 times in 31 alternative zinc finger proteins (Supplementary file 4). These analyses show  
225 that a number of alternative proteins can be classified into families and will help  
226 deciphering their functions.

227

228 **Evidence of functional coupling between reference and alternative proteins coded by**  
229 **the same genes.** Since one gene codes for both a reference and one or several alternative  
230 proteins, we asked whether paired (encoded in the same gene) alternative and reference  
231 proteins have functional relationships. There are a few known examples of functional  
232 interactions between different proteins encoded in the same gene (Table 3). If there is  
233 functional cooperation or shared function, one would expect orthologous alternative-  
234 reference protein pairs to be co-conserved<sup>40</sup>. Our results show a large fraction of co-  
235 conserved alternative- reference protein pairs in several species (Figure 11). Detailed  
236 results for all species are presented in Table 4.

237 Another mechanism that could functionally associate alternative and reference proteins  
238 from the same transcripts would be that they share protein domains. We compared the  
239 functional annotations of the 585 alternative proteins with an InterPro entry with the  
240 reference proteins expressed from the same genes. Strikingly, 89 of 110 altORFs coding  
241 for zinc finger proteins (Figure 10) are present in transcripts in which the CDS also codes  
242 for a zinc finger protein. Overall, 138 alternative/reference protein pairs share at least one  
243 InterPro entry and many pairs share more than one entry (Figure 12a). The number of  
244 shared entries was much higher than expected by chance (Figure 12b,  $p < 0.0001$ ). The  
245 correspondence between InterPro domains of alternative proteins and their corresponding  
246 reference proteins coded by the same transcripts also indicates that even when entries are

247 not identical, the InterPro terms are functionally related (Figure 12c; Figure 12-figure  
248 supplement 1), overall supporting a potential functional association between reference  
249 and predicted alternative proteins. Domain sharing remains significant even when the  
250 most frequent domains, zinc fingers, are not considered (Figure 12-figure supplement 2).

251

252 Recently, the interactome of each of 131 human zinc finger proteins was determined by  
253 affinity purification followed by mass spectrometry<sup>41</sup>. This study provides a unique  
254 opportunity to test if, in addition to possessing zinc finger domains, some pairs of  
255 reference and alternative proteins coded by the same gene also interact. We re-analyzed  
256 the MS data using our alternative protein sequence database to detect alternative proteins  
257 in this interactome. Five alternative proteins were identified within the interactome of  
258 their reference zinc finger proteins. This number was higher than expected by chance  
259 ( $p < 10^{-6}$ ) based on 1 million binomial simulations of randomized interactomes. This result  
260 strongly supports the hypothesis of functional cooperation between alternative and  
261 reference proteins coded by the same genes.

262

263 Finally, we integrated the co-conservation and expression analyses to produce a high-  
264 confidence list of predicted functional and co-operating alternative proteins and found  
265 3,028 alternative proteins in mammals (*H. sapiens* to *B. taurus*), and 51 in vertebrates (*H.*  
266 *sapiens* to *D. rerio*) (supplementary file 6). In order to further test for functional  
267 cooperation between alternative/reference protein pairs in this list, we focused on  
268 alternative proteins detected with at least two peptide spectrum matches. From this  
269 subset, we selected altMID51 (IP\_294711.1) among the top 3% of alternative proteins

270 detected with the highest number of peptide spectrum matches in proteomics studies, and  
271 altDDIT3 (IP\_211724.1) among the top 3% of altORFs with the most cumulative reads in  
272 translation initiation ribosome profiling studies.

273 AltMiD51 is a 70 amino acid alternative protein conserved in vertebrates<sup>42</sup> and co-  
274 conserved with its reference protein MiD51 from humans to zebrafish (supplementary  
275 file 6). Its coding sequence is present in exon 2 of the *MiD51/MIEF1/SMCR7L* gene. This  
276 exon forms part of the 5'UTR for the canonical mRNA and is annotated as non-coding in  
277 current gene databases (Figure 13a). Yet, altMiD51 is robustly detected by MS in several  
278 cell lines (Supplementary file 2: HEK293, HeLa, HeLa S3, LNCaP, NCI60 and U2OS  
279 cells), and we validated some spectra using synthetic peptides (Figure 13-figure  
280 supplement 1), and is also detected by ribosome profiling (Supplementary file 1)<sup>37,42,43</sup>.

281 We confirmed co-expression of altMiD51 and MiD51 from the same transcript (Figure  
282 13b). Importantly, the tripeptide LYR motif predicted with InterProScan and located in  
283 the N-terminal domain of altMiD51 (Figure 13a) is a signature of mitochondrial proteins  
284 localized in the mitochondrial matrix<sup>44</sup>. Since *MiD51/MIEF1/SMCR7L* encodes the  
285 mitochondrial protein MiD51, which promotes mitochondrial fission by recruiting  
286 cytosolic Drp1, a member of the dynamin family of large GTPases, to mitochondria<sup>45</sup>, we  
287 tested for a possible functional connection between these two proteins expressed from the  
288 same mRNA. We first confirmed that MiD51 induces mitochondrial fission (Figure 13-  
289 figure supplement 2). Remarkably, we found that altMiD51 also localizes at the  
290 mitochondria (Figure 13c; Figure 13-figure supplement 3) and that its overexpression  
291 results in mitochondrial fission (Figure 13d). This activity is unlikely to be through  
292 perturbation of oxidative phosphorylation since the overexpression of altMiD51 did not

293 change oxygen consumption nor ATP and reactive oxygen species production (Figure 13-  
294 figure supplement 4). The decrease in spare respiratory capacity in altMiD51-expressing  
295 cells (Figure 13-figure supplement 4a) likely resulted from mitochondrial fission<sup>46</sup>. The  
296 LYR domain is essential for altMiD51-induced mitochondrial fission since a mutant of  
297 the LYR domain, altMiD51(LYR→AAA) was unable to convert the mitochondrial  
298 morphology from tubular to fragmented (Figure 13d). Drp1(K38A), a dominant negative  
299 mutant of Drp1<sup>47</sup>, largely prevented the ability of altMiD51 to induce mitochondrial  
300 fragmentation (Figure 13d; Figure 13-figure supplement 5a). In a control experiment, co-  
301 expression of wild-type Drp1 and altMiD51 proteins resulted in mitochondrial  
302 fragmentation (Figure 13-figure supplement 5b). Expression of the different constructs  
303 used in these experiments was verified by western blot (Figure 13-figure supplement 6).  
304 Drp1 knockdown interfered with altMiD51-induced mitochondrial fragmentation (Figure  
305 14), confirming the proposition that Drp1 mediates altMiD51-induced mitochondrial  
306 fragmentation. It remains possible that altMiD51 promotes mitochondrial fission  
307 independently of Drp1 and is able to reverse the hyperfusion induced by Drp1  
308 inactivation. However, Drp1 is the key player mediating mitochondrial fission and most  
309 likely mediates altMiD51-induced mitochondrial fragmentation, as indicated by our  
310 results.

311 AltDDIT3 is a 34 amino acid alternative protein conserved in vertebrates and co-  
312 conserved with its reference protein DDIT3 from human to bovine (supplementary file  
313 6). Its coding sequence overlaps the end of exon 1 and the beginning of exon 2 of the  
314 *DDIT3/CHOP/GADD153* gene. These exons form part of the 5'UTR for the canonical  
315 mRNA (Figure 15a). To determine the cellular localization of altDDIT3 and its possible

316 relationship with DDIT3, confocal microscopy analyses were performed on HeLa cells  
317 co-transfected with altDDIT3<sup>GFP</sup> and DDIT3<sup>mCherry</sup>. Interestingly, both proteins were  
318 mainly localized in the nucleus and partially localized in the cytoplasm (Figure 15b). This  
319 distribution for DDIT3 confirms previous studies<sup>48,49</sup>. Both proteins seemed to co-  
320 localize in these two compartments (Pearson correlation coefficient of 0.92, Figure 15c).  
321 We further confirmed the statistical significance of this colocalization by applying  
322 Costes' automatic threshold and Costes' randomization colocalization analysis and  
323 Manders Correlation Coefficient (Figure 15d)<sup>50</sup>. This was tested by co-  
324 immunoprecipitation. In lysates from cells co-expressing altDDIT3<sup>GFP</sup> and DDIT3<sup>mCherry</sup>,  
325 DDIT3<sup>mCherry</sup> was immunoprecipitated with anti-GFP antibodies, confirming an  
326 interaction between the small altDDIT3 and the large DDIT3 proteins encoded in the  
327 same gene.

328

329

### 330 **Discussion**

331 In light of the increasing evidence from approaches such as ribosome profiling and MS-  
332 based proteomics that the one mRNA-one canonical CDS assumption is strongly  
333 challenged, our findings provide the first clear functional insight into a new layer of  
334 regulation in genome function. While many observed altORFs may be evolutionary  
335 accidents with no functional role, at least 9 independent lines of evidence support  
336 translation and a functional role for thousands of alternative proteins: (1)  
337 overrepresentation of altORFs relative to shuffled sequences; (2) overrepresentation of  
338 altORF Kozak sequences; (3) active altORF translation detected via ribosomal profiling;

339 (4) detection of thousand alternative proteins in multiple existing proteomic databases;  
340 (5) correlated altORF-CDS conservation, but with overrepresentation of highly conserved  
341 and fast-evolving altORFs; (6) underrepresentation of altORFs in repeat sequences; (7)  
342 overrepresentation of identical InterPro signatures between alternative and reference  
343 proteins encoded in the same mRNAs; (8) several thousand co-conserved paired  
344 alternative-reference proteins encoded in the same gene; and (9) presence of clear,  
345 striking examples in altMiD51, altDDI3T and 5 alternative proteins interacting with their  
346 reference zinc finger proteins. While 5 of these 9 lines of evidence support an unspecified  
347 functional altORF role, 4 of them (5, 7, 8 and 9) independently support a specific  
348 functional/evolutionary interpretation of their role: that alternative proteins and reference  
349 proteins have paired functions. Note that this hypothesis does not require binding, just  
350 functional cooperation such as activity on a shared pathway.

351

352 Upstream ORFs here labeled altORFs<sup>5'</sup> are important translational regulators of canonical  
353 CDSs in vertebrates<sup>51</sup>. Interestingly, the altORF<sup>5'</sup> encoding altDDIT3 was characterized  
354 as an inhibitory upstream ORF<sup>52</sup>, but the corresponding small protein was not sought.  
355 The detection of altMiD51 and altDDI3T suggests that a fraction of altORFs<sup>5'</sup> may have  
356 dual functions as translation regulators and functional proteins.

357

358 Our results raise the question of the evolutionary origins of these altORFs. A first  
359 possible mechanism involves the polymorphism of initiation and stop codons during  
360 evolution<sup>53,54</sup>. For instance, the generation of an early stop codon in the 5' end of a CDS  
361 could be followed by the evolution of another translation initiation site downstream,



362 creating a new independent ORF in the 3'UTR of the canonical gene. This mechanism of  
363 altORF origin, reminiscent of gene fission, would at the same time produce a new altORF  
364 that shares protein domains with the annotated CDS, as we observed for a substantial  
365 fraction (24%) of the 585 alternative proteins with an InterPro entry. A second mechanism  
366 would be de novo origin of ORFs, which would follow the well-established models of  
367 gene evolution *de novo*<sup>20,55,56</sup> in which new ORFs are transcribed and translated and have  
368 new functions or await the evolution of new functions by mutations. The numerous  
369 altORFs with no detectable protein domains may have originated this way from  
370 previously non-coding regions or in regions that completely overlap with CDS in other  
371 reading frames.

372

373 Detection is an important challenge in the study of small proteins. A TIS detected by  
374 ribosome profiling does not necessarily imply that the protein is expressed as a stable  
375 molecule, and proteomic analyses more readily detect large proteins that generate several  
376 peptides after enzymatic digestion. In addition, evolutionary novel genes tend to be lowly  
377 expressed, again reducing the probability of detection<sup>20</sup>. Here, we used a combination of  
378 five search engines and false discovery rate cut-offs were set at 1% for peptide-spectrum  
379 match, peptides and proteins, thus increasing the confidence and sensitivity of hits  
380 compared to single-search-engine processing<sup>57,58</sup>. This strategy led to the detection of  
381 several thousand alternative proteins. However, ribosome profiling and MS have  
382 technical caveats and the comprehensive contribution of small proteins to the proteome  
383 will require more efforts, including the development of new tools such as specific  
384 antibodies.

385

386 In conclusion, our deep annotation of the transcriptome reveals that a large number of  
387 small eukaryotic proteins, which may even represent the majority, are still officially  
388 unannotated. Our results also suggest that many small and large proteins coded by the  
389 same mRNA may cooperate by regulating each other's function or by functioning in the  
390 same pathway, confirming the few examples in the literature of unrelated proteins  
391 encoded in the same genes and functionally cooperating<sup>59-63</sup>. To determine whether or not  
392 this functional cooperation is a general feature of small/large protein pairs encoded in the  
393 same gene will require much more experimental evidence, but our results strongly  
394 support this hypothesis.

395

## 396 **Materials and methods**

### 397 **Generation of alternative open reading frames (altORFs) and alternative protein**

398 **databases.** Throughout this manuscript, annotated protein coding sequences and proteins  
399 in current databases are labelled annotated coding sequences or CDSs and reference  
400 proteins, respectively. For simplicity reasons, predicted alternative protein coding  
401 sequences are labelled alternative open reading frames or altORFs.

402 To generate MySQL databases containing the sequences of all predicted alternative  
403 proteins translated from reference annotation of different organisms, a computational  
404 pipeline of Perl scripts was developed as previously described with some modifications<sup>37</sup>.

405 Genome annotations for *H. sapiens* (release hg38, Assembly: GCF\_000001405.26), *P.*  
406 *troglydytes* (Pan\_troglydytes-2.1.4, Assembly: GCF\_000001515.6), *M. musculus*  
407 (GRCm38.p2, Assembly: GCF\_000001635.22), *D. melanogaster* (release 6, Assembly:

408 GCA\_000705575.1), *C. elegans* (WBcel235, Assembly: GCF\_000002985.6) and *S.*  
409 *cerevisiae* (Sc\_YJM993\_v1, Assembly: GCA\_000662435.1) were downloaded from the  
410 NCBI website (<http://www.ncbi.nlm.nih.gov/genome>). For *B. taurus* (release UMD  
411 3.1.86), *X. tropicalis* (release JGI\_4.2) and *D. rerio* (GRCz10.84), genome annotations  
412 were downloaded from Ensembl (<http://www.ensembl.org/info/data/ftp/>). Each annotated  
413 transcript was translated *in silico* with Transeq<sup>64</sup>. All ORFs starting with an AUG and  
414 ending with a stop codon different from the CDS, with a minimum length of 30 codons  
415 (including the stop codon) and identified in a distinct reading frame compared to the  
416 annotated CDS were defined as altORFs.

417 An additional quality control step was performed to remove initially predicted altORFs  
418 with a high level of identity with reference proteins. Such altORFs typically start in a  
419 different coding frame than the reference protein but through alternative splicing, end  
420 with the same amino acid sequence as their associated reference protein. Using BLAST,  
421 altORFs overlapping CDSs chromosomal coordinates and showing more than 80%  
422 identity and overlap with an annotated CDS were rejected.

423 AltORF localization was assigned according to the position of the predicted translation  
424 initiation site (TIS): altORFs<sup>5'</sup>, altORFs<sup>CDS</sup> and altORFs<sup>3'</sup> are altORFs with TISs located  
425 in 5'UTRs, CDSs and 3'UTRs, respectively. Non-coding RNAs (ncRNAs) have no  
426 annotated CDS and all ORFs located within ncRNAs are labelled altORFs<sup>nc</sup>.

427 The presence of the simplified Kozak sequence (A/GNNATGG) known to be favorable  
428 for efficient translation initiation was also assessed for each predicted altORF<sup>65</sup>.

429

430 **Identification of TISs.** The global aggregates of initiating ribosome profiles data were

431 obtained from the initiating ribosomes tracks in the GWIPS-viz genome browser<sup>28</sup> with  
432 ribosome profiling data collected from five large scale studies<sup>2,9,66-68</sup>. Sites were mapped  
433 to hg38 using a chain file from the UCSC genome browser  
434 (<http://hgdownload.soe.ucsc.edu/goldenPath/hg19/liftOver/hg19ToHg38.over.chain.gz>)  
435 and CrossMap v0.1.6 (<http://crossmap.sourceforge.net/>). Similar to the methods used in  
436 these studies, an altORF is considered as having an active TIS if it is associated with at  
437 least 10 reads at one of the 7 nucleotide positions of the sequence NNNAUGN (AUG is  
438 the predicted altORF TIS). An additional recent study was also included in our analysis<sup>29</sup>.  
439 Raw sequencing data for ribosome protected fragments in harringtonine treated cells was  
440 aligned to the human genome (GRCh38) using bowtie2 (2.2.8). Similar to the method  
441 used in this work, altORFs with at least 5 reads overlapping one position in the kozak  
442 region were considered as having an experimentally validated TIS.

443

444 **Generation of shuffled transcriptomes.** Each annotated transcript was shuffled using  
445 the Fisher-Yates shuffle algorithm. In CDS regions, all codons were shuffled except the  
446 initiation and stop codons. For mRNAs, we shuffled the 5'UTRs, CDSs and 3'UTRs  
447 independently to control for base composition. Non-coding regions were shuffled at the  
448 nucleotide level. The resulting shuffled transcriptome has the following features  
449 compared to hg38: same number of transcripts, same transcripts lengths, same nucleotide  
450 composition, and same amino-acid composition for the proteins translated from the  
451 CDSs. Shuffling was repeated 100 times and the results are presented with average values  
452 and standard deviations. The total number of altORFs is 551,380 for hg38, and an  
453 average of 489,073 for shuffled hg38. AltORFs and kozak motifs in the 100 shuffled

454 transcriptomes were detected as described above for hg38.

455

456 **Identification of paralogs/orthologs in alternative proteomes.** Both alternative and  
457 reference proteomes were investigated. Pairwise ortholog and paralog relationships  
458 between the human proteomes and the proteomes from other species, were calculated  
459 using an InParanoid-like approach<sup>69</sup>, as described below. The following BLAST  
460 procedure was used. Comparisons using our datasets of altORFs/CDS protein sequences  
461 in multiple FASTA formats from *Saccharomyces cerevisiae*, *Caenorhabditis elegans*,  
462 *Drosophila melanogaster*, *Danio rerio*, *Xenopus tropicalis* *Bos taurus*, *Mus musculus*,  
463 *Pan troglodytes*, *Homo sapiens* were performed between each pair of species (human  
464 against the other species), involving four whole proteome runs per species pair: pairwise  
465 comparisons (organism A vs organism B, organism B vs organism A), plus two self-self  
466 runs(organism A vs organism A, organism B vs organism B). BLAST homology  
467 inference was accepted when the length of the aligned region between the query and the  
468 match sequence equalled or exceeded 50% of the length of the sequence, and when the  
469 bitscore reached a minimum of 40<sup>70</sup>. Orthologs were detected by finding the mutually  
470 best scoring pairwise hits (reciprocal best hits) between datasets A-B and B-A. The self-  
471 self runs were used to identify paralogy relationships as described<sup>69</sup>.

472

473 **Co-conservation analyses.** For each orthologous alternative protein pair A-B between  
474 two species, we evaluated the presence and the orthology of their corresponding  
475 reference proteins A'-B' in the same species. In addition, the corresponding altORFs and  
476 CDSs had to be present in the same gene.

477 In order to develop a null model to assess co-conservation of alternative proteins and  
478 their reference pairs, we needed to establish a probability that any given orthologous  
479 alternative protein would by chance occur encoded on the same transcript as its paired,  
480 orthologous reference protein. Although altORFs might in theory shift among CDSs (and  
481 indeed, a few examples have been observed), transposition events are expected to be  
482 relatively rare; we thus used the probability that the orthologous alternative protein is  
483 paired with any orthologous CDS for our null model. Because this probability is by  
484 definition higher than the probability that the altORF occurs on the paired CDS, it is a  
485 conservative estimate of co-conservation. We took two approaches to estimating this  
486 percentage, and then used whichever was higher for each species pair, yielding an even  
487 more conservative estimate. First, we assessed the percentage of orthologous reference  
488 proteins under the null supposition that each orthologous alternative protein had an equal  
489 probability of being paired with any reference protein, orthologous or not. Second, we  
490 assessed the percentage of non-orthologous alternative proteins that were paired with  
491 orthologous reference proteins. This would account for factors such as longer CDSs  
492 having a higher probability of being orthologous and having a larger number of paired  
493 altORFs. For example, between humans and mice, we found that 22,304 of 51,819  
494 reference proteins (43%) were orthologs. Of the 157,261 non-orthologous alternative  
495 proteins, 106,987 (68%) were paired with an orthologous reference protein. Because 68%  
496 is greater than 43%, we used 68% as the probability for use in our null model.  
497 Subsequently, our model strongly indicates co-conservation (Fig. 11;  $p < 10^{-6}$  based on 1  
498 million binomial simulations; highest observed random percentage = 69%, much lower  
499 than the observed 96% co-conservation).

500

501 **Analysis of third codon position (wobble) conservation.** Basewise conservation scores  
502 for the alignment of 100 vertebrate genomes including *H. sapiens* were obtained from  
503 UCSC genome browser  
504 (<http://hgdownload.soe.ucsc.edu/goldenPath/hg38/phyloP100way/>). Conservation PhyloP  
505 scores relative to each nucleotide position within codons were extracted using a custom  
506 Perl script and the Bio-BigFile module version 1.07. The PhyloP conservation score for  
507 the wobble nucleotide of each codon within the CDS was extracted. For the 53,862  
508 altORFs completely nested inside 20,814 CDSs, the average PhyloP score for wobble  
509 nucleotides within the altORF region was compared to the average score for the complete  
510 CDS. To generate controls, random regions in CDSs with a similar length distribution as  
511 altORFs were selected and PhyloP scores for wobble nucleotides were extracted. We  
512 compared the differences between altORF and CDS PhyloP scores (altORF PhyloP –  
513 CDS PhyloP) to those generated based on random regions. We identified expected  
514 quantiles of the differences (“DQ” column in the table), and compared these to the  
515 observed differences. Because there was greater conservation of wobble nucleotide  
516 PhyloP scores within altORFs regions located farther from the center of their respective  
517 genes ( $r = 0.08$ ,  $p < 0.0001$ ), observed differences were adjusted using an 8-knot cubic  
518 basis spline of percent distance from center. These observed differences were also  
519 adjusted for site-specific signals as detected in the controls.

520

521 **Human alternative protein classification and in silico functional annotation.**

522 *Repeat and transposable element annotation*

523 RepeatMasker, a popular software to scan DNA sequences for identifying and classifying  
524 repetitive elements, was used to investigate the extent of altORFs derived from  
525 transposable elements<sup>71</sup>. Version 3-3-0 was run with default settings.

#### 526 *Alternative protein analysis using InterProScan*

527 InterProScan combines 15 different databases, most of which use Hidden Markov models  
528 for signature identification<sup>72</sup>. Interpro merges the redundant predictions into a single  
529 entry and provides a common annotation. A recent local version of InterProScan 5.14-  
530 53.0 was run using default parameters to scan for known protein domains in alternative  
531 proteins. Gene ontology (GO) and pathway annotations were also reported if available  
532 with -goterm and -pa options. Only protein signatures with an E-value  $\leq 10^{-3}$  were  
533 considered.

534 We classified the reported InterPro hits as belonging to one or several of three clusters;  
535 (1) alternative proteins with InterPro entries; (2) alternative proteins with signal peptides  
536 (SP) and/or transmembrane domains (TM) predicted by at least two of the three SignalP,  
537 PHOBIUS, TMHMM tools and (3) alternative proteins with other signatures.

538 The GO terms assigned to alternative proteins with InterPro entries were grouped and  
539 categorised into 13 classes within the three ontologies (cellular component, biological  
540 process, molecular function) using the CateGORizer tool<sup>73</sup>.

541 Each unique alternative protein with InterPro entries and its corresponding reference  
542 protein (encoded in the same transcript) were retrieved from our InterProscan output.

543 Alternative and reference proteins without any InterPro entries were ignored. The overlap  
544 in InterPro entries between alternative and reference proteins was estimated as follows.

545 We went through the list of alternative/reference protein pairs and counted the overlap in



546 the number of entries between the alternative and reference proteins as  
547  $100 \times \text{intersection/union}$ . All reference proteins and the corresponding alternative proteins  
548 were combined together in each comparison so that all domains of all isoforms for a  
549 given reference protein were considered in each comparison. The random distribution of  
550 the number of alternative/reference protein pairs that share at least one InterPro entry was  
551 computed by shuffling the alternative/reference protein pairs and calculating how many  
552 share at least one InterPro entry. This procedure was repeated 1,000 times. Finally, we  
553 compared the number and identity of shared InterPro entries in a two dimensional matrix  
554 to illustrate which Interpro entries are shared. In many instances, including for zinc-finger  
555 coding genes, InterPro entries in alternative/reference protein pairs tend to be related  
556 when they are not identical.

557

558 **Mass Spectrometry identification parameters.** Wrapper Perl scripts were developed for  
559 the use of SearchGUI v2.0.11<sup>74</sup> and PeptideShaker v1.1.0<sup>57</sup> on the Université de  
560 Sherbrooke's 39,168 core high-performance Mammouth Parallèle 2 computing cluster  
561 (<http://www.calculquebec.ca/en/resources/compute-servers/mammouth-parallele-ii>).

562 SearchGUI was configured to run the following proteomics identification search engines:  
563 X!Tandem<sup>75</sup>, MS-GF+<sup>76</sup>, MyriMatch<sup>77</sup>, Comet<sup>78</sup>, and OMSSA<sup>79</sup>. SearchGUI parameters  
564 were set as follow: maximum precursor charge, 5; maximum number of PTM per peptide,  
565 5; X!Tandem minimal fragment m/z, 140; removal of initiator methionine for Comet, 1. A  
566 full list of parameters used for SearchGUI and PeptideShaker is available in  
567 Supplementary file 2, sheet 1. For PXD000953 dataset<sup>35</sup>, precursor and fragment  
568 tolerance were set 0.006 Da and 0.1 Da respectively, with carbamidomethylation of C as

569 a fixed modification and Nter-Acetylation and methionine oxidation as variable  
570 modifications. For PXD000788<sup>33</sup> and PXD000612<sup>34</sup> datasets, precursor and fragment  
571 tolerance were set to 4.5 ppm and 0.1 Da respectively with carbamidomethylation of  
572 cysteine as a fixed modification and Nter-Acetylation, methionine oxidation and  
573 phosphorylation of serine, threonine and tyrosine as variable modifications. For  
574 PXD002815 dataset<sup>32</sup>, precursor and fragment tolerance were set to 4.5 ppm and 0.1 Da  
575 respectively with carbamidomethylation of cysteine as a fixed modification and Nter-  
576 Acetylation and methionine oxidation as variable modifications. Datasets were searched  
577 using a target-decoy approach against a composite database composed of a target  
578 database [Uniprot canonical and isoform reference proteome (16 January 2015) for a total  
579 of 89,861 sequences + custom alternative proteome resulting from the in silico translation  
580 of all human altORFs (available to download at  
581 <https://www.roucoulab.com/p/downloads>)], and their reverse protein sequences from the  
582 target database used as decoys. False discovery rate cut-offs were set at 1% for PSM,  
583 peptides and proteins. Only alternative proteins identified with at least one unique and  
584 specific peptide, and with at least one confident PSM in the PeptideShaker Hierarchical  
585 Report were considered valid<sup>57</sup>.  
586 Peptides matching proteins in a protein sequence database for common contaminants  
587 were rejected<sup>80</sup>.  
588 For spectral validation (Figure 13-figure supplement 1; Supplementary Figures 1-4),  
589 synthetic peptides were purchased from the peptide synthesis service at the Université de  
590 Sherbrooke. Peptides were solubilized in 10% acetonitrile, 1% formic acid and directly  
591 injected into a Q-Exactive mass spectrometer (Thermo Scientific) via an electro spray

592 ionization source (Thermo Scientific). Spectra were acquired using Xcalibur 2.2 at 70000  
593 resolution with an AGC target of 3e6 and HCD collision energy of 25. Peaks were  
594 assigned manually by comparing monoisotopic m/z theoretical fragments and  
595 experimental (PeptideShaker) spectra.

596 In order to test if the interaction between alternative zinc-finger/reference zinc-finger  
597 protein pairs (encoded in the same gene) may have occurred by chance only, all  
598 interactions between alternative proteins and reference proteins were randomized with an  
599 in-house randomisation script. The number of interactions with reference proteins for  
600 each altProt was kept identical as the number of observed interactions. The results  
601 indicate that interactions between alternative zinc-finger/reference zinc-finger protein  
602 pairs did not occur by chance ( $p < 10^{-6}$ ) based on 1 million binomial simulations; highest  
603 observed random interactions between alternative zinc-finger proteins and their reference  
604 proteins = 3 (39 times out of 1 million simulations), compared to detected interactions=5.

605 **Code availability.** Computer codes are available upon request with no restrictions.

606

607 **Data availability.** Most Data are available in Supplementary information. Alternative  
608 protein databases for different species can be accessed at  
609 <https://www.roucoulab.com/p/downloads> with no restrictions.

610

611 **Cloning and antibodies.** Human Flag-tagged altMiD51(WT) and  
612 altMiD51(LYR→AAA), and HA-tagged DrP1(K38A) were cloned into pcDNA3.1  
613 (Invitrogen) using a Gibson assembly kit (New England Biolabs, E26115). The cDNA

614 corresponding to human MiD51/MIEF1/SMCR7L transcript variant 1 (NM\_019008) was  
615 also cloned into pcDNA3.1 by Gibson assembly. In this construct, altMiD51 and MiD51  
616 were tagged with Flag and HA tags, respectively. MiD51<sup>GFP</sup> and altMiD51<sup>GFP</sup> were also  
617 cloned into pcDNA3.1 by Gibson assembly. For MiD51<sup>GFP</sup>, a LAP tag<sup>32</sup> was inserted  
618 between MiD51 and GFP. gBlocks were purchased from IDT. Human altDDIT3<sup>mCherry</sup>  
619 was cloned into pcDNA3.1 by Gibson assembly using coding sequence from transcript  
620 variant 1 (NM\_001195053) and mCherry coding sequence from pLenti-myc-GLUT4-  
621 mCherry (Addgene plasmid # 64049). Human DDIT3<sup>GFP</sup> was also cloned into pcDNA3.1  
622 by Gibson assembly using CCDS8943 sequence. gBlocks were purchased from IDT.  
623 For immunofluorescence, primary antibodies were diluted as follow: anti-Flag (Sigma,  
624 F1804) 1/1000, anti-TOM20 (Abcam, ab186734) 1/500. For western blots, primary  
625 antibodies were diluted as follow: anti-Flag (Sigma, F1804) 1/1000, anti-HA (BioLegend,  
626 901515) 1/500, anti-actin (Sigma, A5441) 1/10000, anti-Drp1 (BD Transduction  
627 Laboratories, 611112) 1/500, anti-GFP (Santa Cruz Biotechnology, sc-9996) 1/10000,  
628 anti-mCherry (Abcam, ab125096) 1/2000.

629

630 **Cell culture, immunofluorescence, knockdown and western blots.** HeLa cell (ATCC  
631 CCL-2) cultures, transfections, immunofluorescence, confocal analyses and western blots  
632 were carried out as previously described<sup>81</sup>. Mitochondrial morphology was analyzed as  
633 previously described<sup>82</sup>. A minimum of 100 cells were counted (n=3 or 300 cells for each  
634 experimental condition). Three independent experiments were performed.  
635 For Drp1 knockdown, 25,000 HeLa cells in 24-well plates were transfected with 25 nM  
636 Drp1 SMARTpool: siGENOME siRNA (Dharmacon, M-012092-01-0005) or ON-

637 TARGET plus Non-targeting pool siRNAs (Dharmacon, D-001810-10-05) with  
638 DharmaFECT 1 transfection reagent (Dharmacon, T-2001-02) according to the  
639 manufacturer's protocol. After 24h, cells were transfected with pcDNA3.1 or altMiD51,  
640 incubated for 24h, and processed for immunofluorescence or western blot. Colocalization  
641 analyses were performed using the JACoP plugin (Just Another Co-localization Plugin)<sup>50</sup>  
642 implemented in Image J software.

643

644 **Mitochondrial localization, parameters and ROS production.** Trypan blue quenching  
645 experiment was performed as previously described<sup>83</sup>.

646 A flux analyzer (XF96 Extracellular Flux Analyzer; Seahorse Bioscience, Agilent  
647 technologies) was used to determine the mitochondrial function in HeLa cells  
648 overexpressing AltMiD51<sup>Flag</sup>. Cells were plated in a XF96 plate (Seahorse Biosciences)  
649 at  $1 \times 10^4$  cells per well in Dulbecco's modified Eagle's medium supplemented with 10%  
650 FBS with antibiotics. After 24 hours, cells were transfected for 24 hours with an empty  
651 vector (pcDNA3.1) or with the same vector expressing AltMiD51<sup>Flag</sup> with GeneCellin  
652 tranfection reagent according to the manufacturer's instructions. Cells were equilibrated  
653 in XF assay media supplemented with 25 mM glucose and 1 mM pyruvate and were  
654 incubated at 37°C in a CO<sub>2</sub>-free incubator for 1 h. Baseline oxygen consumption rates  
655 (OCRs) of the cells were recorded with a mix/wait/measure times of 3/0/3 min  
656 respectively. Following these measurements, oligomycin (1 μM), FCCP (0.5 μM), and  
657 antimycin A/rotenone (1 μM) were sequentially injected, with oxygen consumption rate  
658 measurements recorded after each injection. Data were normalized to total protein in each  
659 well. For normalization, cells were lysed in the 96-well XF plates using 15 μl/well of

660 RIPA lysis buffer (1% Triton X-100, 1% NaDeoxycholate, 0.1% SDS, 1mM EDTA, 50  
661 mM Tris-HCl pH7.5). Protein concentration was measured using the BCA protein assay  
662 reagent (Pierce, Waltham, MA, USA).

663 Reactive oxygen species (ROS) levels were measured using Cellular ROS/Superoxide  
664 Detection Assay Kit (Abcam #139476). HeLa cells were seeded onto 96-well black/clear  
665 bottom plates at a density of 6,000 cells per well with 4 replicates for each condition.  
666 After 24 hours, cells were transfected for 24 hours with an empty vector (pcDNA3.1) or  
667 with the same vector expressing AltMiD51<sup>Flag</sup> with GeneCellin according to the  
668 manufacturer's instruction. Cells were untreated or incubated with the ROS inhibitor (N-  
669 acetyl-L-cysteine) at 10mM for 1 hour. Following this, the cells were washed twice with  
670 the wash solution and then labeled for 1 hour with the Oxidative Stress Detection  
671 Reagent (green) diluted 1:1000 in the wash solution with or without the positive control  
672 ROS Inducer Pyocyanin at 100µM. Fluorescence was monitored in real time. ROS  
673 accumulation rate was measured between 1 to 3 hours following induction. After the  
674 assay, total cellular protein content was measured using BCA protein assay reagent  
675 (Pierce, Waltham, MA, USA) after lysis with RIPA buffer. Data were normalised for  
676 initial fluorescence and protein concentration.

677 ATP synthesis was measured as previously described<sup>84</sup> in cells transfected for 24 hours  
678 with an empty vector (pcDNA3.1) or with the same vector expressing AltMiD51<sup>Flag</sup>.

679

## 680 **Acknowledgements**

681 This research was supported by CIHR grants MOP-137056 and MOP-136962 to X.R;  
682 MOP-299432 and MOP-324265 to C.L; a Université de Sherbrooke institutional research

683 grant made possible through a generous donation by Merck Sharp & Dohme to X.R; a  
684 FRQNT team grant 2015-PR-181807 to C.L. and X.R; Canada Research Chairs in  
685 Functional Proteomics and Discovery of New Proteins to X.R, in Evolutionary Cell and  
686 Systems Biology to C.L and in Computational and Biological Complexity to A.O; A.A.C  
687 is supported by a CIHR New Investigator Salary Award; M.S.S is a recipient of a Fonds  
688 de Recherche du Québec – Santé Research Scholar Junior 1 Career Award; V.D is  
689 supported in part by fellowships from Région Nord-Pas de Calais and PROTEO; A.A.C,  
690 D.J.H, M.S.S and X.R are members of the Fonds de Recherche du Québec Santé-  
691 supported Centre de Recherche du Centre Hospitalier Universitaire de Sherbrooke. We  
692 thank the staff from the Centre for Computational Science at the Université de  
693 Sherbrooke, Compute Canada and Compute Québec for access to the Mammoth  
694 supercomputer.

695

696

697 **References**

- 698 1. Ingolia, N. T., Lareau, L. F. & Weissman, J. S. Ribosome profiling of mouse  
699 embryonic stem cells reveals the complexity and dynamics of mammalian  
700 proteomes. *Cell* **147**, 789–802 (2011).
- 701 2. Lee, S. S. *et al.* Global mapping of translation initiation sites in mammalian cells at  
702 single-nucleotide resolution. *Proc. Natl. Acad. Sci. U. S. A.* **109**, E2424-2432  
703 (2012).
- 704 3. Mouilleron, H., Delcourt, V. & Roucou, X. Death of a dogma: eukaryotic mRNAs  
705 can code for more than one protein. *Nucleic Acids Res.* **44**, 14–23 (2015).
- 706 4. Pauli, A. *et al.* Toddler: An Embryonic Signal That Promotes Cell Movement via  
707 Apelin Receptors. *Science* **343**, 1248636–1248636 (2014).
- 708 5. Anderson, D. M. *et al.* A Micropeptide Encoded by a Putative Long Noncoding  
709 RNA Regulates Muscle Performance. *Cell* **160**, 595–606 (2015).
- 710 6. Zanet, J. *et al.* Pri sORF peptides induce selective proteasome-mediated protein  
711 processing. *Science* **349**, 1356–1358 (2015).
- 712 7. Nelson, B. R. *et al.* A peptide encoded by a transcript annotated as long noncoding  
713 RNA enhances SERCA activity in muscle. *Science (80-. ).* **351**, 271–275 (2016).
- 714 8. Bazzini, A. A. *et al.* Identification of small ORFs in vertebrates using ribosome  
715 footprinting and evolutionary conservation. *EMBO J.* **33**, 981–993 (2014).
- 716 9. Ji, Z., Song, R., Regev, A. & Struhl, K. Many lncRNAs, 5'UTRs, and pseudogenes  
717 are translated and some are likely to express functional proteins. *Elife* **4**, e08890  
718 (2015).
- 719 10. Prabakaran, S. *et al.* Quantitative profiling of peptides from RNAs classified as



- 720 noncoding. *Nat. Commun.* **5**, 5429 (2014).
- 721 11. Slavoff, S. a *et al.* Peptidomic discovery of short open reading frame-encoded  
722 peptides in human cells. *Nat. Chem. Biol.* **9**, 59–64 (2013).
- 723 12. Andrews, S. J. & Rothnagel, J. A. Emerging evidence for functional peptides  
724 encoded by short open reading frames. *Nat. Rev. Genet.* **15**, 193–204 (2014).
- 725 13. Landry, C. R., Zhong, X., Nielly-Thibault, L. & Roucou, X. Found in translation:  
726 Functions and evolution of a recently discovered alternative proteome. *Curr. Opin.*  
727 *Struct. Biol.* **32**, 74–80 (2015).
- 728 14. Fields, A. P. *et al.* A Regression-Based Analysis of Ribosome-Profiling Data  
729 Reveals a Conserved Complexity to Mammalian Translation. *Mol. Cell* **60**, 816–  
730 827 (2015).
- 731 15. Saghatelian, A. & Couso, J. P. Discovery and characterization of smORF-encoded  
732 bioactive polypeptides. *Nat. Chem. Biol.* **11**, 909–16 (2015).
- 733 16. Stock, D., Leslie, A. G. & Walker, J. E. Molecular architecture of the rotary motor  
734 in ATP synthase. *Science* **286**, 1700–1705 (1999).
- 735 17. Schmitt, J. P. *et al.* Dilated cardiomyopathy and heart failure caused by a mutation  
736 in phospholamban. *Science* **299**, 1410–1413 (2003).
- 737 18. Nemeth, E. *et al.* Heparin regulates cellular iron efflux by binding to ferroportin  
738 and inducing its internalization. *Science* **306**, 2090–2093 (2004).
- 739 19. Carvunis, A.-R. *et al.* Proto-genes and de novo gene birth. *Nature* 3–7 (2012).  
740 doi:10.1038/nature11184
- 741 20. Schlötterer, C. Genes from scratch--the evolutionary fate of de novo genes. *Trends*  
742 *Genet.* **31**, 215–9 (2015).

- 743 21. McLysaght, A. & Hurst, L. D. Open questions in the study of de novo genes: what,  
744 how and why. *Nat. Rev. Genet.* **17**, 567–578 (2016).
- 745 22. Sabath, N., Wagner, A. & Karlin, D. Evolution of viral proteins originated de novo  
746 by overprinting. *Mol. Biol. Evol.* **29**, 3767–80 (2012).
- 747 23. Iacono, M., Mignone, F. & Pesole, G. uAUG and uORFs in human and rodent  
748 5'untranslated mRNAs. *Gene* **349**, 97–105 (2005).
- 749 24. Neafsey, D. E. & Galagan, J. E. Dual modes of natural selection on upstream open  
750 reading frames. *Mol. Biol. Evol.* **24**, 1744–51 (2007).
- 751 25. Smith, E. *et al.* Leaky ribosomal scanning in mammalian genomes: significance of  
752 histone H4 alternative translation in vivo. *Nucleic Acids Res.* **33**, 1298–1308  
753 (2005).
- 754 26. Pop, C. *et al.* Causal signals between codon bias, mRNA structure, and the  
755 efficiency of translation and elongation. *Mol. Syst. Biol.* **10**, 770 (2014).
- 756 27. Pollard, K. S., Hubisz, M. J., Rosenbloom, K. R. & Siepel, A. Detection of  
757 nonneutral substitution rates on mammalian phylogenies. *Genome Res.* **20**, 110–  
758 121 (2010).
- 759 28. Michel, A. M. *et al.* GWIPS-viz: development of a ribo-seq genome browser.  
760 *Nucleic Acids Res.* **42**, D859-864 (2014).
- 761 29. Raj, A. *et al.* Thousands of novel translated open reading frames in humans  
762 inferred by ribosome footprint profiling. *Elife* **5**, 1–24 (2016).
- 763 30. Miettinen, T. P. & Björklund, M. Modified ribosome profiling reveals high  
764 abundance of ribosome protected mRNA fragments derived from 3' untranslated  
765 regions. *Nucleic Acids Res.* **43**, 1019–1034 (2015).

- 766 31. Weingarten-Gabbay, S. *et al.* Systematic discovery of cap-independent translation  
767 sequences in human and viral genomes. *Science (80-. )*. **351**, 1–24 (2016).
- 768 32. Hein, M. Y. *et al.* A Human Interactome in Three Quantitative Dimensions  
769 Organized by Stoichiometries and Abundances. *Cell* **163**, 712–723 (2015).
- 770 33. Tong, J., Taylor, P. & Moran, M. F. Proteomic analysis of the epidermal growth  
771 factor receptor (EGFR) interactome and post-translational modifications associated  
772 with receptor endocytosis in response to EGF and stress. *Mol. Cell. Proteomics* **13**,  
773 1644–1658 (2014).
- 774 34. Sharma, K. *et al.* Ultradeep Human Phosphoproteome Reveals a Distinct  
775 Regulatory Nature of Tyr and Ser/Thr-Based Signaling. *Cell Rep.* **8**, 1583–1594  
776 (2014).
- 777 35. Rosenberger, G. *et al.* A repository of assays to quantify 10,000 human proteins by  
778 SWATH-MS. *Sci. data* **1**, 140031 (2014).
- 779 36. Mitchell, A. *et al.* The InterPro protein families database: the classification  
780 resource after 15 years. *Nucleic Acids Res.* **43**, D213–221 (2014).
- 781 37. Vanderperre, B. *et al.* Direct detection of alternative open reading frames  
782 translation products in human significantly expands the proteome. *PLoS One* **8**,  
783 e70698 (2013).
- 784 38. Wolfe, S. A., Nekludova, L. & Pabo, C. O. DNA recognition by Cys2His2 zinc  
785 finger proteins. *Annu. Rev. Biophys. Biomol. Struct.* **29**, 183–212 (2000).
- 786 39. Laity, J. H., Lee, B. M. & Wright, P. E. Zinc finger proteins: new insights into  
787 structural and functional diversity. *Curr. Opin. Struct. Biol.* **11**, 39–46 (2001).
- 788 40. Karimpour-Fard, A., Detweiler, C. S., Erickson, K. D., Hunter, L. & Gill, R. T.

- 789 Cross-species cluster co-conservation: a new method for generating protein  
790 interaction networks. *Genome Biol.* **8**, R185 (2007).
- 791 41. Schmitges, F. W. *et al.* Multiparameter functional diversity of human C2H2 zinc  
792 finger proteins. *Genome Res.* **26**, 1742–1752 (2016).
- 793 42. Andreev, D. E. *et al.* Translation of 5' leaders is pervasive in genes resistant to  
794 eIF2 repression. *Elife* **4**, e03971 (2015).
- 795 43. Kim, M.-S. *et al.* A draft map of the human proteome. *Nature* **509**, 575–581  
796 (2014).
- 797 44. Angerer, H. Eukaryotic LYR Proteins Interact with Mitochondrial Protein  
798 Complexes. *Biology (Basel)*. **4**, 133–150 (2015).
- 799 45. Losón, O. C., Song, Z., Chen, H. & Chan, D. C. Fis1, Mff, MiD49, and MiD51  
800 mediate Drp1 recruitment in mitochondrial fission. *Mol. Biol. Cell* **24**, 659–667  
801 (2013).
- 802 46. Motori, E. *et al.* Inflammation-Induced Alteration of Astrocyte Mitochondrial  
803 Dynamics Requires Autophagy for Mitochondrial Network Maintenance. *Cell*  
804 *Metab.* **18**, 844–859 (2013).
- 805 47. Smirnova, E., Shurland, D. L., Ryazantsev, S. N. & van der Bliek, A. M. A human  
806 dynamin-related protein controls the distribution of mitochondria. *J. Cell Biol.*  
807 **143**, 351–358 (1998).
- 808 48. Cui, K., Coutts, M., Stahl, J. & Sytkowski, A. J. Novel interaction between the  
809 transcription factor CHOP (GADD153) and the ribosomal protein FTE/S3a  
810 modulates erythropoiesis. *J. Biol. Chem.* **275**, 7591–6 (2000).
- 811 49. Chiribau, C.-B., Gaccioli, F., Huang, C. C., Yuan, C. L. & Hatzoglou, M.

- 812 Molecular symbiosis of CHOP and C/EBP beta isoform LIP contributes to  
813 endoplasmic reticulum stress-induced apoptosis. *Mol. Cell. Biol.* **30**, 3722–31  
814 (2010).
- 815 50. Bolte, S. & Cordelières, F. P. A guided tour into subcellular colocalization analysis  
816 in light microscopy. *J. Microsc.* **224**, 213–32 (2006).
- 817 51. Johnstone, T. G., Bazzini, A. A. & Giraldez, A. J. Upstream ORFs are prevalent  
818 translational repressors in vertebrates. *EMBO J.* (2016).  
819 doi:10.15252/embj.201592759
- 820 52. Jousse, C. *et al.* Inhibition of CHOP translation by a peptide encoded by an open  
821 reading frame localized in the chop 5'UTR. *Nucleic Acids Res.* **29**, 4341–51  
822 (2001).
- 823 53. Lee, Y. C. G. & Reinhardt, J. A. Widespread Polymorphism in the Positions of  
824 Stop Codons in *Drosophila melanogaster*. *Genome Biol. Evol.* **4**, 533–549 (2012).
- 825 54. Andreatta, M. E. *et al.* The Recent De Novo Origin of Protein C-Termini. *Genome*  
826 *Biol. Evol.* **7**, 1686–701 (2015).
- 827 55. Knowles, D. G. & McLysaght, A. Recent de novo origin of human protein-coding  
828 genes. *Genome Res.* **19**, 1752–9 (2009).
- 829 56. Neme, R. & Tautz, D. Phylogenetic patterns of emergence of new genes support a  
830 model of frequent de novo evolution. *BMC Genomics* **14**, 117 (2013).
- 831 57. Vaudel, M. *et al.* PeptideShaker enables reanalysis of MS-derived proteomics data  
832 sets. *Nat. Biotechnol.* **33**, 22–24 (2015).
- 833 58. Shteynberg, D. *et al.* iProphet: multi-level integrative analysis of shotgun  
834 proteomic data improves peptide and protein identification rates and error

- 835 estimates. *Mol. Cell. Proteomics* **10**, M111.007690 (2011).
- 836 59. Quelle, D. E., Zindy, F., Ashmun, R. A. & Sherr, C. J. Alternative reading frames  
837 of the INK4a tumor suppressor gene encode two unrelated proteins capable of  
838 inducing cell cycle arrest. *Cell* **83**, 993–1000 (1995).
- 839 60. Abramowitz, J., Grenet, D., Birnbaumer, M., Torres, H. N. & Birnbaumer, L.  
840 XLalphas, the extra-long form of the alpha-subunit of the Gs G protein, is  
841 significantly longer than suspected, and so is its companion Alex. *Proc. Natl.*  
842 *Acad. Sci. U. S. A.* **101**, 8366–8371 (2004).
- 843 61. Bergeron, D. *et al.* An out-of-frame overlapping reading frame in the ataxin-1  
844 coding sequence encodes a novel ataxin-1 interacting protein. *J. Biol. Chem.* **288**,  
845 21824–35 (2013).
- 846 62. Lee, C. -f. C., Lai, H.-L. H.-L., Lee, Y.-C., Chien, C.-L. C.-L. & Chern, Y. The  
847 A2A Adenosine Receptor Is a Dual Coding Gene: A NOVEL MECHANISM OF  
848 GENE USAGE AND SIGNAL TRANSDUCTION. *J. Biol. Chem.* **289**, 1257–  
849 1270 (2014).
- 850 63. Yosten, G. L. C. *et al.* A 5'-Upstream short open reading frame encoded peptide  
851 regulates angiotensin type 1a receptor production and signaling via the beta-  
852 arrestin pathway. *J. Physiol.* **6**, n/a-n/a (2015).
- 853 64. Rice, P., Longden, I. & Bleasby, A. EMBOSS: the European Molecular Biology  
854 Open Software Suite. *Trends Genet.* **16**, 276–277 (2000).
- 855 65. Kozak, M. Pushing the limits of the scanning mechanism for initiation of  
856 translation. *Gene* **299**, 1–34 (2002).
- 857 66. Fritsch, C. *et al.* Genome-wide search for novel human uORFs and N-terminal

- 858 protein extensions using ribosomal footprinting. *Genome Res.* **22**, 2208–2218  
859 (2012).
- 860 67. Stern-Ginossar, N. *et al.* Decoding human cytomegalovirus. *Science* **338**, 1088–93  
861 (2012).
- 862 68. Gao, X. *et al.* Quantitative profiling of initiating ribosomes in vivo. *Nat. Methods*  
863 **12**, 147–53 (2015).
- 864 69. Sonnhammer, E. L. L. & Östlund, G. InParanoid 8: orthology analysis between  
865 273 proteomes, mostly eukaryotic. *Nucleic Acids Res.* **43**, D234–239 (2015).
- 866 70. Remm, M., Storm, C. E. & Sonnhammer, E. L. Automatic clustering of orthologs  
867 and in-paralogs from pairwise species comparisons. *J. Mol. Biol.* **314**, 1041–1052  
868 (2001).
- 869 71. Tarailo-Graovac, M. & Chen, N. Using RepeatMasker to identify repetitive  
870 elements in genomic sequences. *Curr. Protoc. Bioinformatics* **Chapter 4**, Unit  
871 4.10 (2009).
- 872 72. Jones, P. *et al.* InterProScan 5: genome-scale protein function classification.  
873 *Bioinformatics* **30**, 1236–1240 (2014).
- 874 73. Na, D., Son, H. & Gsponer, J. Categorizer: a tool to categorize genes into user-  
875 defined biological groups based on semantic similarity. *BMC Genomics* **15**, 1091  
876 (2014).
- 877 74. Vaudel, M., Barsnes, H., Berven, F. S., Sickmann, A. & Martens, L. SearchGUI:  
878 An open-source graphical user interface for simultaneous OMSSA and X!Tandem  
879 searches. *Proteomics* **11**, 996–999 (2011).
- 880 75. Craig, R. & Beavis, R. C. TANDEM: matching proteins with tandem mass spectra.

- 881 *Bioinformatics* **20**, 1466–1467 (2004).
- 882 76. Kim, S. & Pevzner, P. A. MS-GF+ makes progress towards a universal database  
883 search tool for proteomics. *Nat. Commun.* **5**, 5277 (2014).
- 884 77. Tabb, D. L., Fernando, C. G. & Chambers, M. C. MyriMatch: highly accurate  
885 tandem mass spectral peptide identification by multivariate hypergeometric  
886 analysis. *J. Proteome Res.* **6**, 654–661 (2007).
- 887 78. Eng, J. K., Jahan, T. A. & Hoopmann, M. R. Comet: an open-source MS/MS  
888 sequence database search tool. *Proteomics* **13**, 22–24 (2013).
- 889 79. Geer, L. Y. *et al.* Open mass spectrometry search algorithm. *J. Proteome Res.* **3**,  
890 958–64 (2004).
- 891 80. Perkins, D. N., Pappin, D. J. C., Creasy, D. M. & Cottrell, J. S. Probability-based  
892 protein identification by searching sequence databases using mass spectrometry  
893 data. *Electrophoresis* **20**, 3551–3567 (1999).
- 894 81. Vanderperre, B. *et al.* An overlapping reading frame in the PRNP gene encodes a  
895 novel polypeptide distinct from the prion protein. *FASEB J.* **25**, 2373–86 (2011).
- 896 82. Palmer, C. S. *et al.* MiD49 and MiD51, new components of the mitochondrial  
897 fission machinery. *EMBO Rep.* **12**, 565–573 (2011).
- 898 83. Vanderperre, B. *et al.* MPC1-like: a Placental Mammal-Specific Mitochondrial  
899 Pyruvate Carrier Subunit Expressed in Post-Meiotic Male Germ Cells. *J. Biol.*  
900 *Chem.* (2016). doi:10.1074/jbc.M116.733840
- 901 84. Vives-Bauza, C., Yang, L. & Manfredi, G. Assay of Mitochondrial ATP Synthesis  
902 in Animal Cells and Tissues. *Methods Cell Biol* **80**, 155–171 (2007).
- 903



904

905 **Supplementary figure 1: Spectra validation for altSLC35A4<sup>5'</sup>**

906

907 **Supplementary Figure 2: Spectra validation for altRELT<sup>5'</sup>**

908

909 **Supplementary Figure 3: Spectra validation for altLINC01420<sup>nc</sup>**

910

911 **Supplementary Figure 4: Spectra validation for altSRRM2<sup>CDS</sup>**

912

913 **Supplementary file 1: 12,616 alternative proteins with translation initiation sites**

914 **detected by ribosome profiling after re-analysis of large scale studies.** Sheet 1: list of

915 alternative proteins; sheet 2: pie chart of corresponding altORFs localization.

916

917 **Supplementary file 2: 10,362 alternative proteins detected by mass spectrometry**

918 **(MS) after re-analysis of large proteomic studies.** Sheet 1: MS identification

919 parameters; sheet 2: raw MS output; sheet 3: list of detected alternative proteins; sheet 4:

920 pie chart of corresponding altORFs localization.

921

922 **Supplementary file 3: list of phosphopeptides.**

923

924 **Supplementary file 4: linker sequences separating adjacent zinc finger motifs.**

925

926 **Supplementary file 5: 260 alternative proteins detected by mass spectrometry in the**

927 **interactome of 131 zinc finger proteins.** Sheet 1: MS identification parameters; sheet 2:

928 raw MS output; sheet 3: list of detected alternative proteins.

929

930 **Supplementary file 6: high-confidence list of predicted functional and co-operating**

931 **alternative proteins based on co-conservation and expression analyses.** Sheet 1: co-

932 conservation in mammals; sheet 2: co-conservation in vertebrates.

**Figure 1**

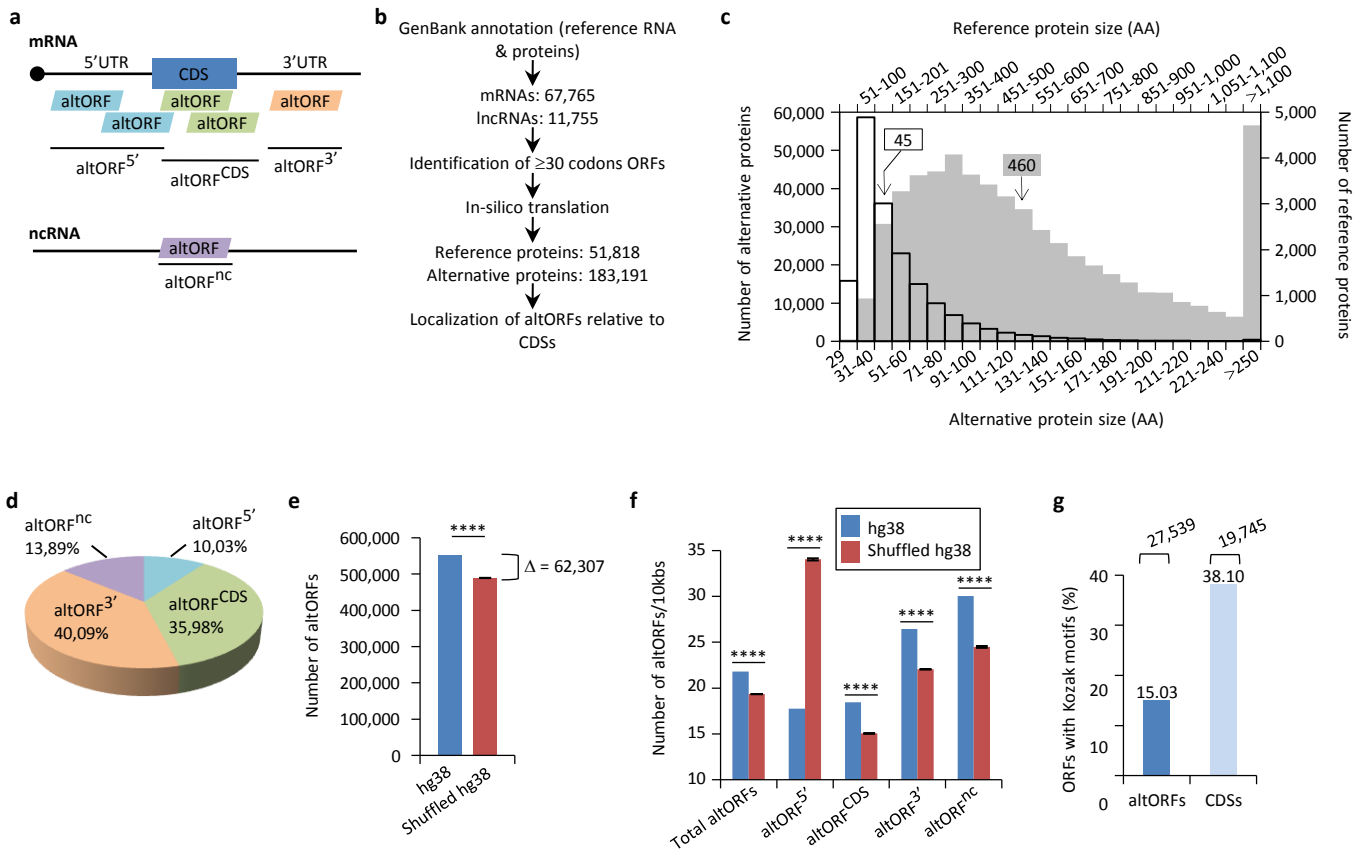

**Figure 1. Annotation of human altORFs.**

(a) AltORF nomenclature. AltORFs partially overlapping the CDS must be in a different reading frame. (b) Pipeline for the identification of altORFs. (c) Size distribution of alternative (empty bars, vertical and horizontal axes) and reference (grey bars, secondary horizontal and vertical axes) proteins. Arrows indicate the median size. The median alternative protein length is 45 amino acids (AA) compared to 460 for the reference proteins. (d) Distribution of altORFs in the human hg38 transcriptome. (e, f) Number of total altORFs (e) or number of altORFs/10kbs (f) in hg38 compared to shuffled hg38. Means and standard deviations for 100 replicates obtained by sequence shuffling are shown. Statistical significance was determined by using one sample t-test with two-tailed  $p$ -values. \*\*\*\*  $P < 0,0001$ . (g) Percentage of altORFs with an optimal Kozak motif. The total number of altORFs with an optimal Kozak motif is also indicated at the top.

Figure 2

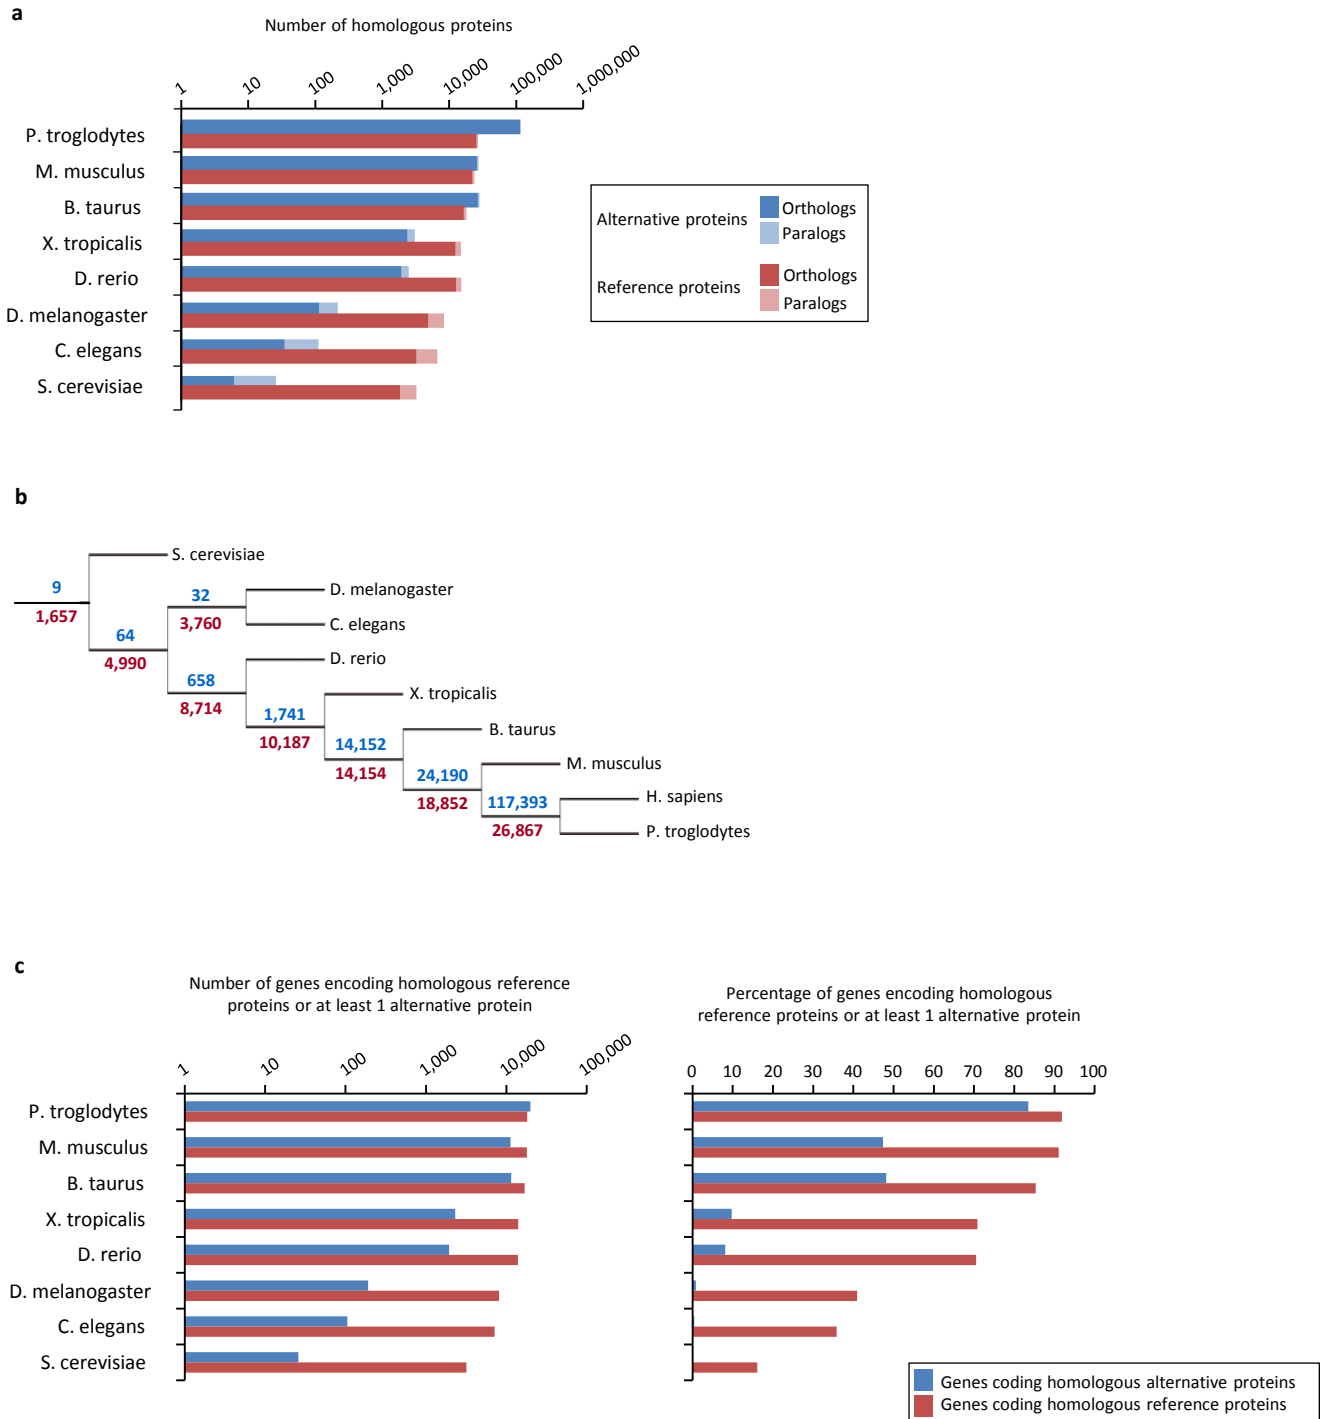

**Figure 2: Conservation of alternative and reference proteins across different species.**

(a) Number of orthologous and paralogous alternative and reference proteins between *H. sapiens* and other species (pairwise study). (b) Phylogenetic tree: conservation of alternative (blue) and reference (red) proteins across various eukaryotic species. (c) Number and fraction of genes encoding homologous reference proteins or at least 1 homologous alternative protein.

Figure 3

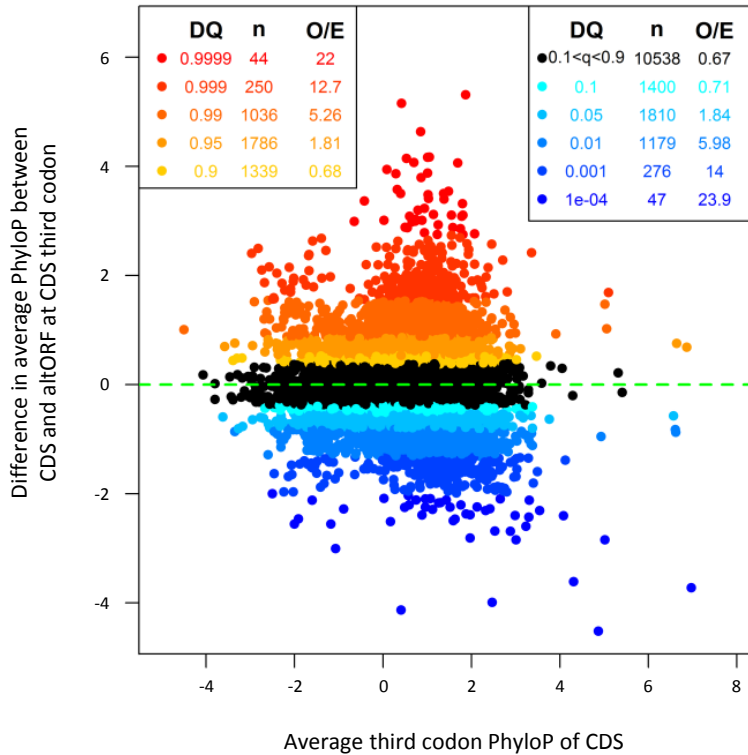

**Figure 3: AltORFs completely nested within CDSs show more extreme PhyloP values (more conserved or faster evolving) than their CDSs.** Differences between altORF and CDS PhyloP scores (altORF PhyloP – CDS PhyloP, y-axis) are plotted against PhyloPs for their respective CDSs (x-axis). The plot contains all 20,814 CDSs containing at least one fully nested altORF, paired with one of its altORFs selected at random (to avoid problems with statistical non-independence). PhyloPs for both altORFs and CDSs are based on 3<sup>rd</sup> codons in the CDS reading frame, calculated across 100 vertebrate species. We compared these differences to those generated based on five random regions in CDSs with a similar length as altORFs. Expected quantiles of the differences (“DQ” columns) were identified and compared to the observed differences. We show the absolute numbers (“n”) and observed-to-expected ratios (“O/E”) for each quantile. There are clearly substantial over-representations of extreme values (red signalling conservation  $DQ \geq 0.95$ , and blue signalling accelerated evolution  $DQ \leq 0.05$ ) with 6,428 of 19,705 altORFs (36.2%). A random distribution would have implied a total of 10% (or 1,970) of altORFs in the extreme values. This suggests that 26.2% (36.2%–10%) of altORFs (or 4,458) undergo specific selection different from random regions in their CDSs with a similar length distribution.

Figure 4

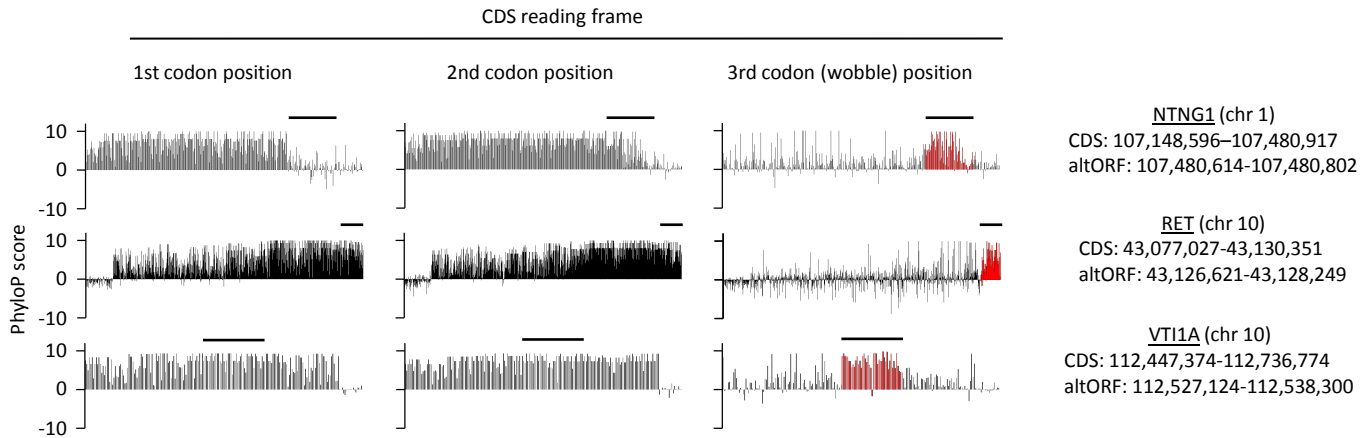

**Figure 4: First, second, and third codon nucleotide PhyloP scores for 100 vertebrate species for the CDSs of the NTNG1, RET and VTI1A genes.** Chromosomal coordinates for the different CDSs and altORFs are indicated on the right. The regions highlighted in red indicate the presence of an altORF characterized by a region with elevated PhyloP scores for wobble nucleotides. The region of the altORF is indicated by a black bar above each graph.

Figure 5

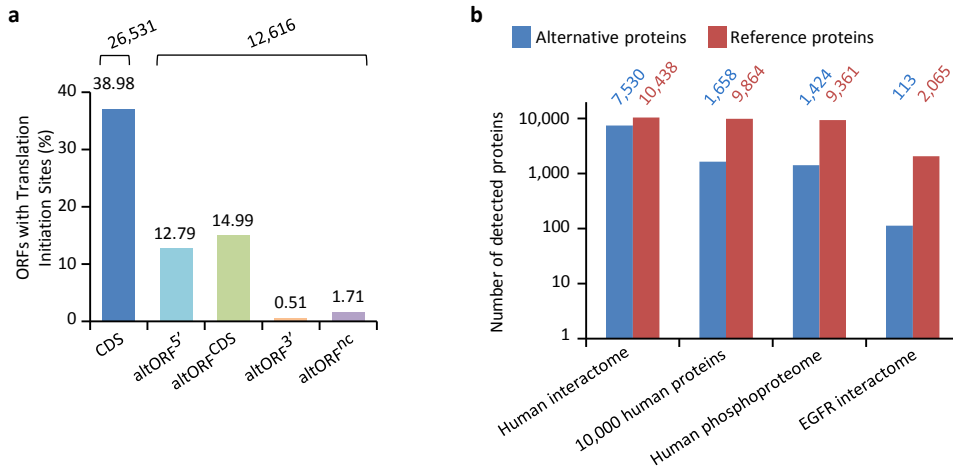

**Figure 5. Expression of human altORFs.**

(a) Percentage of CDSs and altORFs with detected TISs by ribosomal profiling and footprinting of human cells<sup>23</sup>. The total number of CDSs and altORFs with a detected TIS is indicated at the top. (b) Alternative and reference proteins detected in three large proteomic datasets: human interactome<sup>28</sup>, 10,000 human proteins<sup>31</sup>, human phosphoproteome<sup>30</sup>, EGFR interactome<sup>29</sup>. Numbers are indicated above each column.

Figure 6

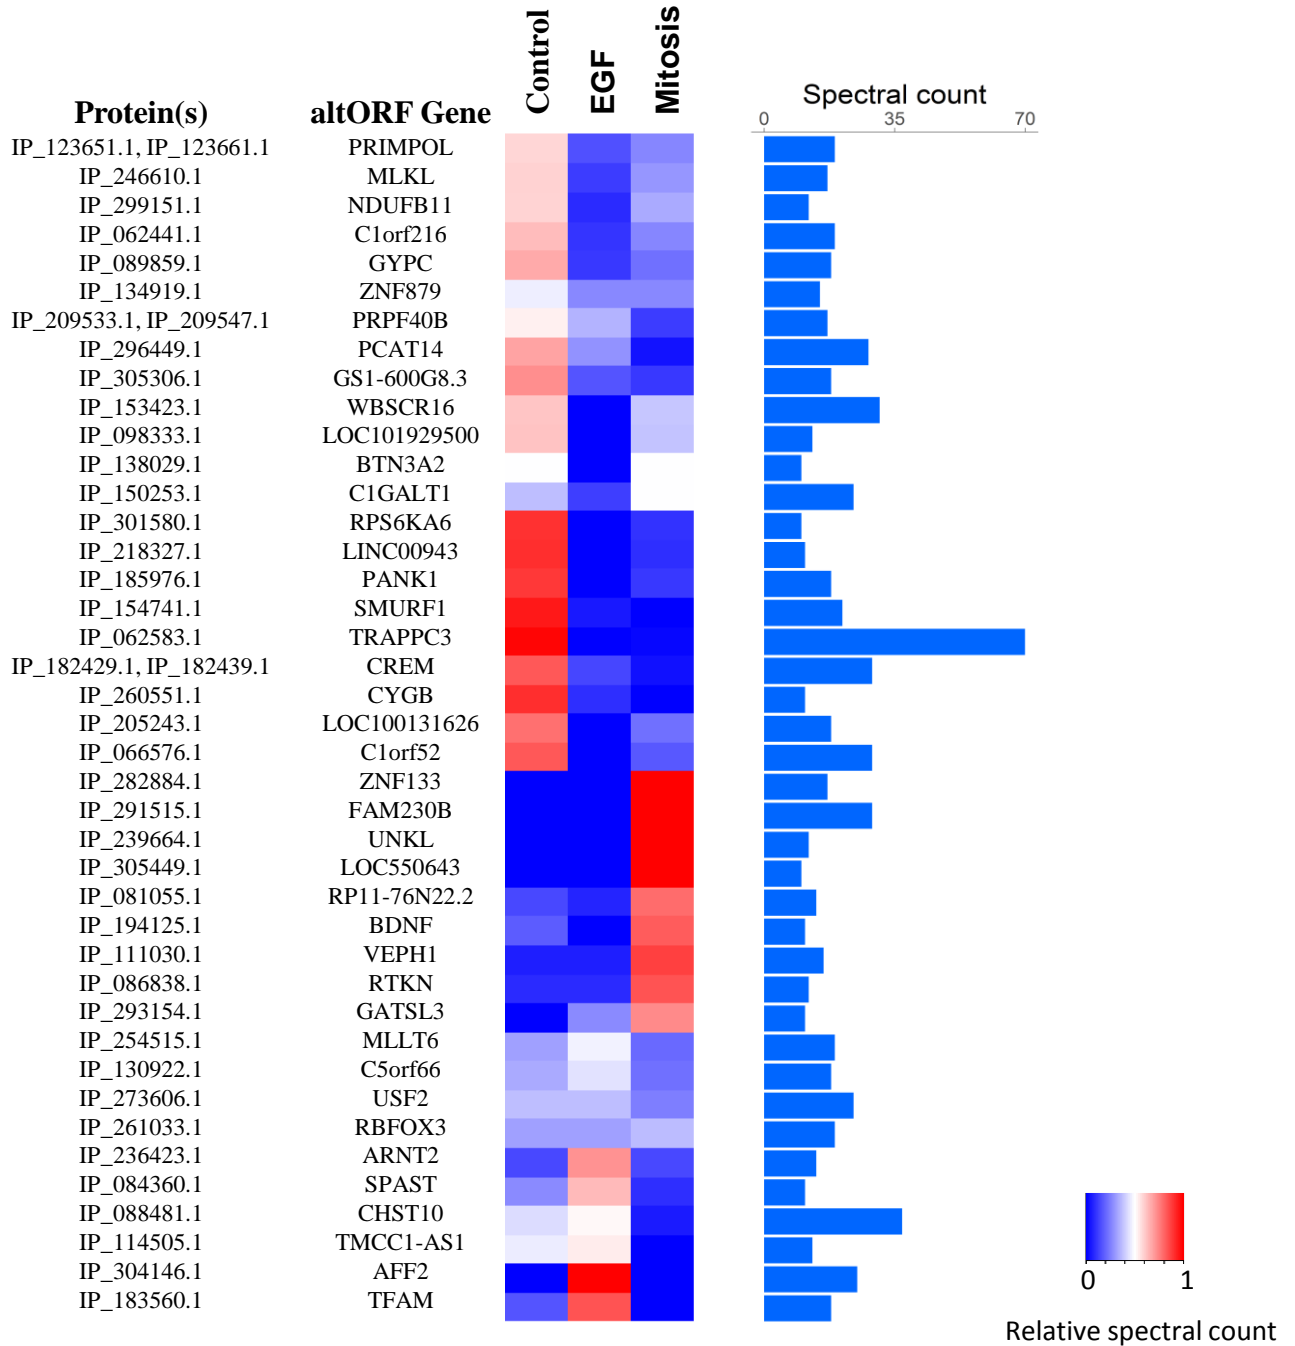

**Figure 6: The alternative phosphoproteome in mitosis and EGF-treated cells.** Heatmap showing relative levels of spectral counts for phosphorylated peptides following the indicated treatment<sup>29</sup>. For each condition, heatmap colors show the percentage of spectral count on total MS/MS phosphopeptide spectra. Blue bars on the right represent the number of MS/MS spectra; only proteins with spectral counts covering a range between 70 and 10 are shown.



Figure 7

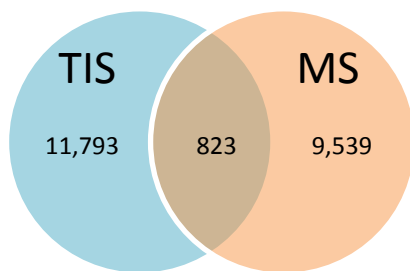

**Figure 7: Number of alternative proteins detected by ribosome profiling and mass spectrometry.**

The expression of 823 alternative proteins was detected by both ribosome profiling (translation initiation sites, TIS) and mass spectrometry (MS).

Figure 8

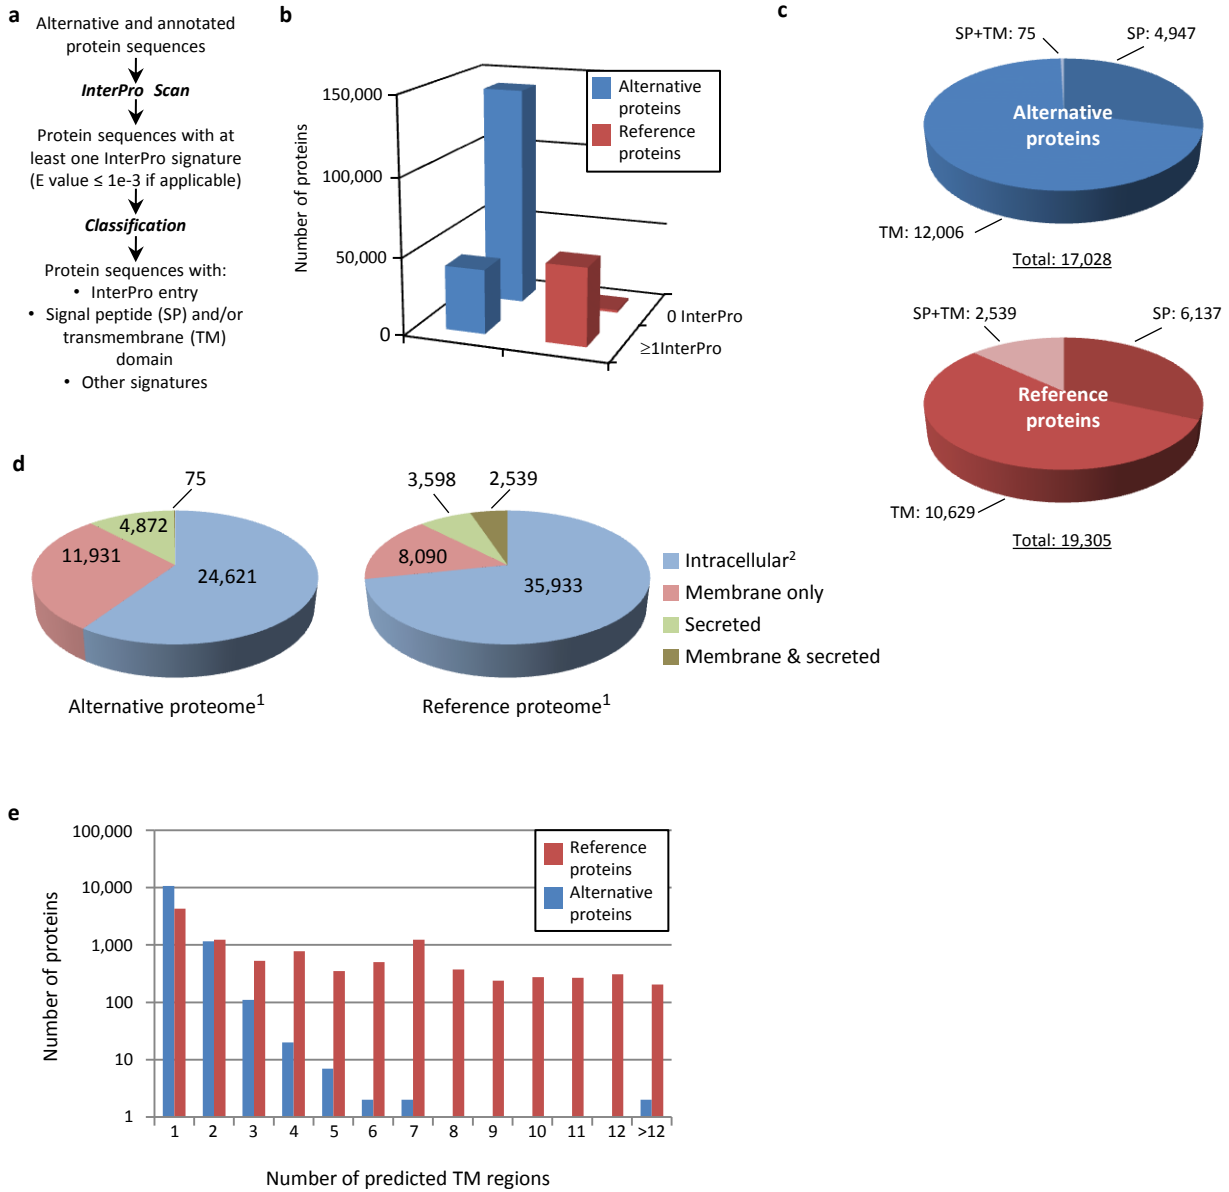

**Figure 8: Human alternative proteome sequence analysis and classification using InterProScan.**

(a) InterPro annotation pipeline. (b) Alternative and reference proteins with InterPro signatures. (c) Number of alternative and reference proteins with transmembrane domains (TM), signal peptides (S) and both TM and SP. (d) Number of all alternative and reference proteins predicted to be intracellular, membrane, secreted and membrane-spanning and secreted. <sup>1</sup>Proteins with at least one InterPro signature; <sup>2</sup>Proteins with no predicted signal peptide or transmembrane features. (e) Number of predicted TM regions for alternative and reference proteins.

# Figure 9

## a Cellular components

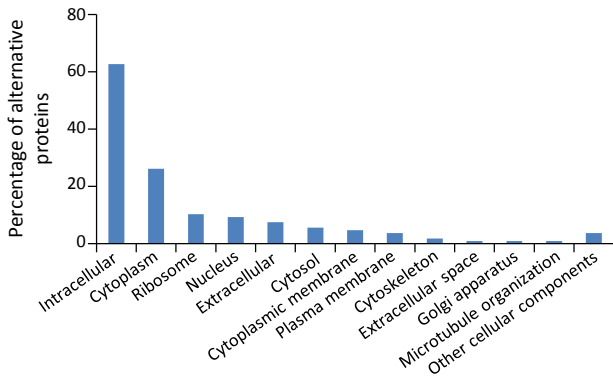

## b Biological process

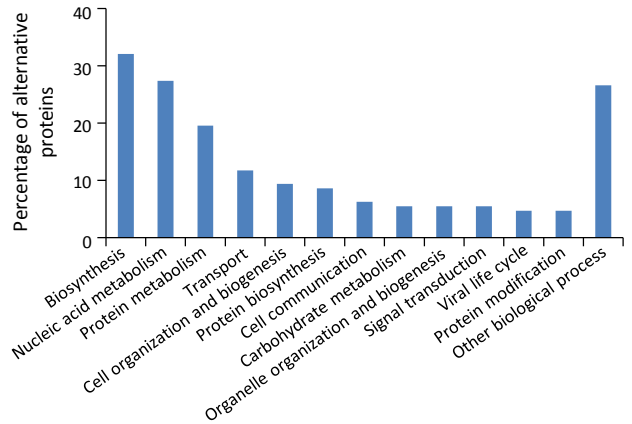

## c Molecular functions

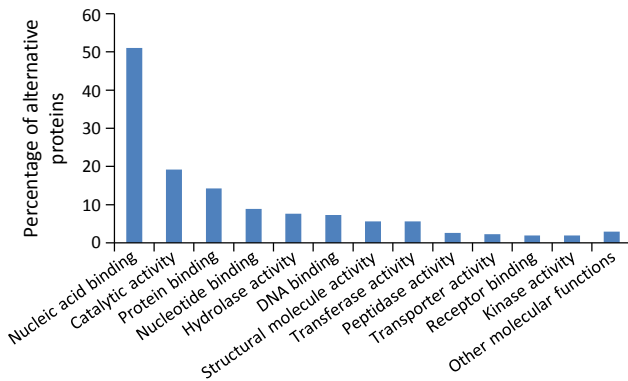

### Figure 9: Gene ontology (GO) annotations for human alternative proteins.

GO terms assigned to InterPro entries are grouped into 13 categories for each of the three ontologies. (a) 34 GO terms were categorized into cellular component for 107 alternative proteins. (b) 64 GO terms were categorized into biological process for 128 alternative proteins. (c) 94 GO terms were categorized into molecular function for 302 alternative proteins. The majority of alternative proteins with GO terms are predicted to be intracellular, to function in nucleic acid-binding, catalytic activity and protein binding and to be involved in biosynthesis and nucleic acid metabolism processes.

Figure 10

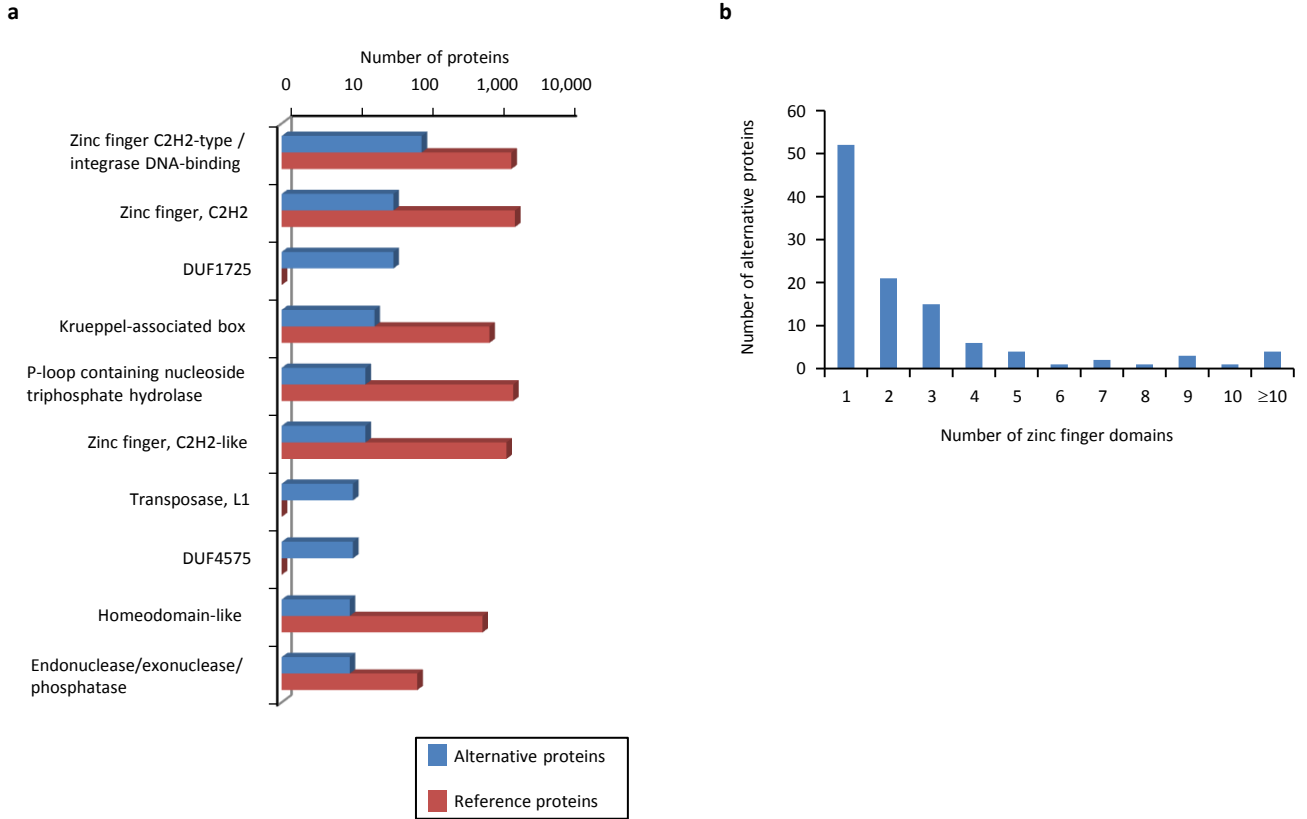

**Figure 10: Main InterPro entries in human alternative proteins.** (a) The top 10 InterPro families in the human alternative proteome. (b) A total of 110 alternative proteins have between 1 and 23 zinc finger domains.

Figure 11

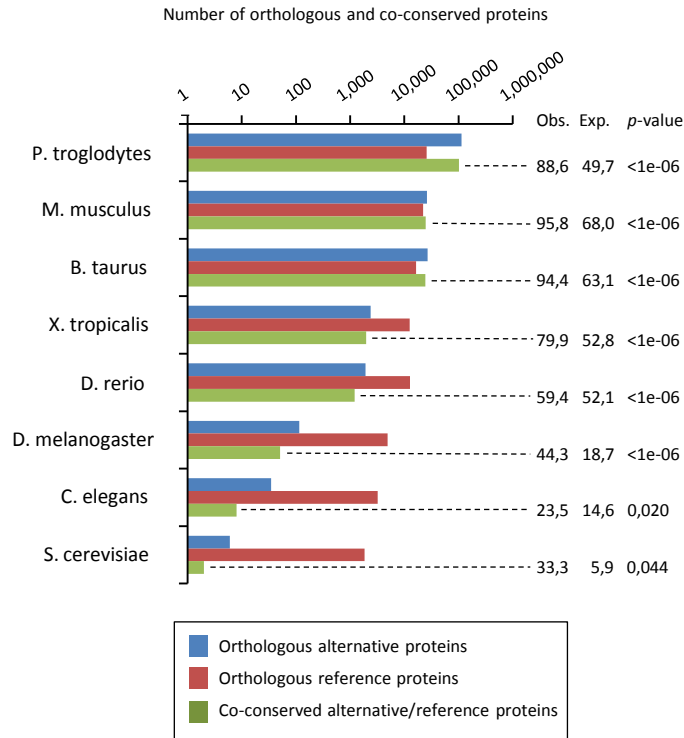

**Figure 11: Number of orthologous and co-conserved alternative and reference proteins between *H. sapiens* and other species (pairwise).** For the co-conservation analyses, the percentage of observed (Obs.), expected (Exp.) and corresponding *p*-values is indicated on the right (see Table 4 for details).

Figure 12

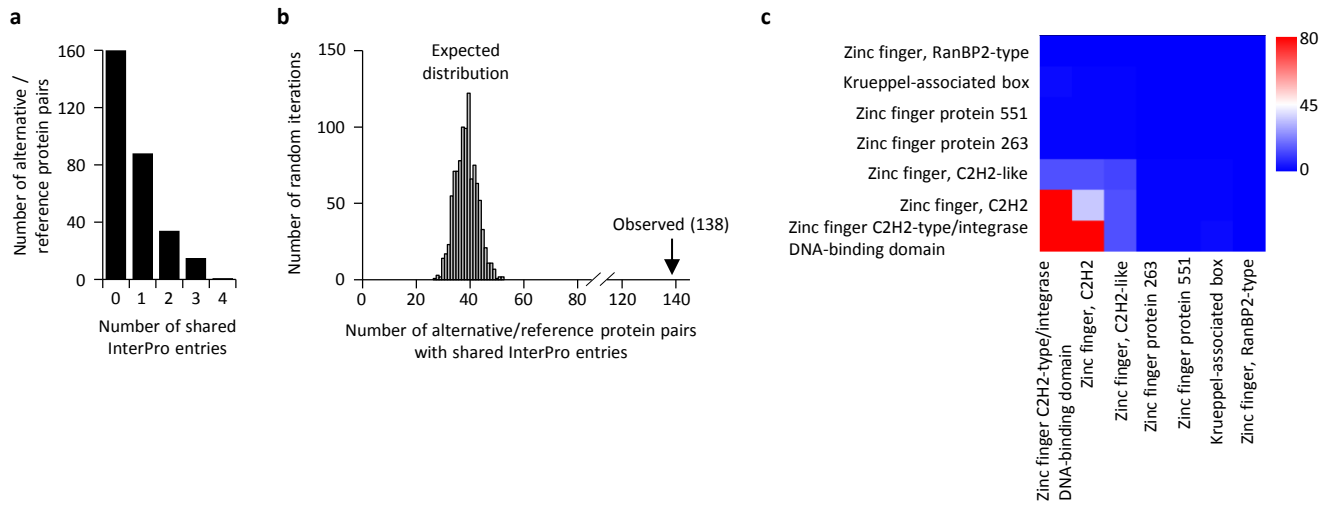

**Figure 12. Reference and alternative proteins share functional domains.**

(a) Distribution of the number of shared InterPro entries between alternative and reference proteins coded by the same transcripts. 138 pairs of alternative and reference proteins share between 1 and 4 protein domains (InterPro entries). Only alternative/reference protein pairs that have at least one domain are considered ( $n = 298$ ). (b) The number of reference/alternative protein pairs that share domains ( $n = 138$ ) is higher than expected by chance alone. The distribution of expected pairs sharing domains and the observed number are shown. (c) Matrix of co-occurrence of domains related to zinc fingers. The entries correspond to the number of times entries co-occur in reference and alternative proteins. The full matrix is available in figure 12-figure supplement 1.

# Figure 13

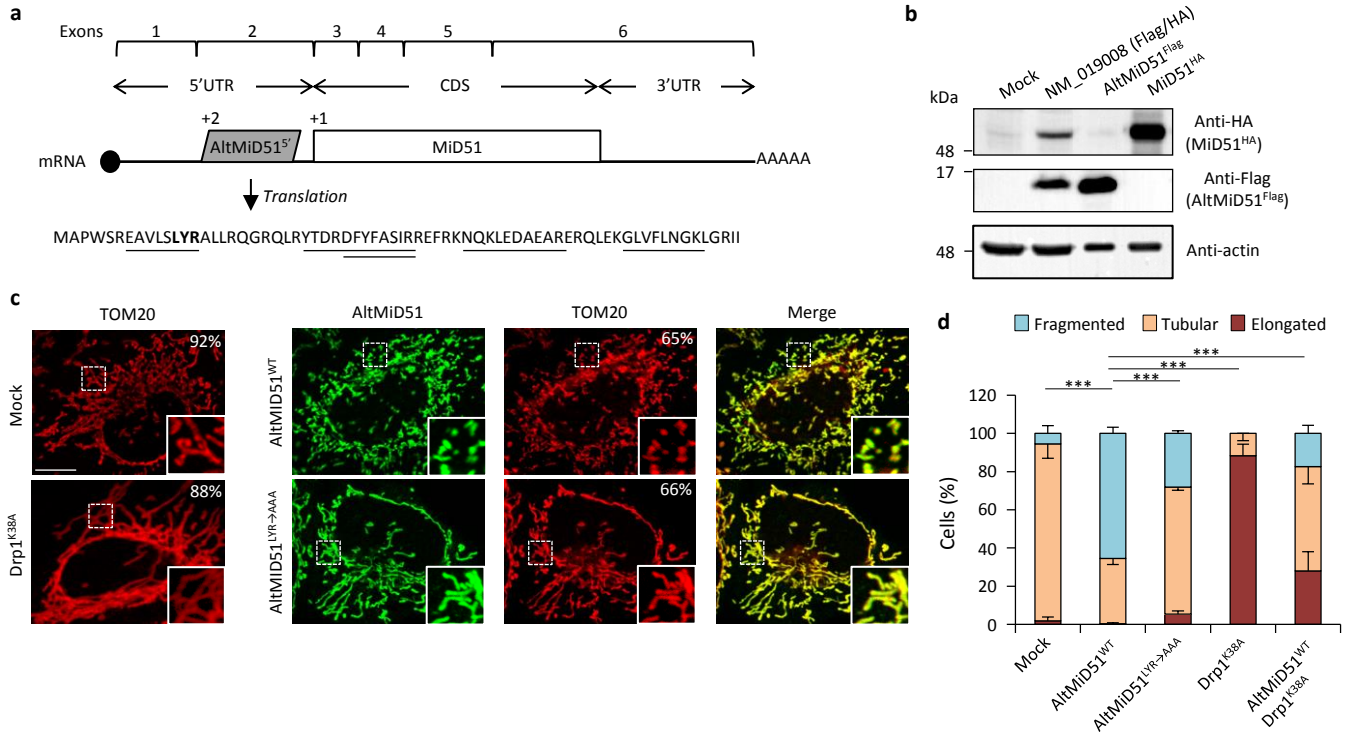

## Figure 13. AltMiD51<sup>5'</sup> expression induces mitochondrial fission.

(a) AltMiD51<sup>5'</sup> coding sequence is located in exon 2 or the *MiD51/Mief1/SMCR7L* gene and in the 5'UTR of the canonical mRNA (RefSeq NM\_019008). +2 and +1 indicate reading frames. AltMiD51 amino acid sequence is shown with the LYR tripeptide shown in bold. Underlined peptides were detected by MS. (b) Human HeLa cells transfected with empty vector (mock), a cDNA corresponding to the canonical MiD51 transcript with a Flag tag in frame with altMiD51 and an HA tag in frame with MiD51, altMiD51<sup>Flag</sup> cDNA or MiD51<sup>HA</sup> cDNA were lysed and analyzed by western blot with antibodies against Flag, HA or actin, as indicated. (c) Confocal microscopy of mock-transfected cells, cells transfected with altMiD51<sup>WT</sup>, altMiD51<sup>LYR→AAA</sup> or Drp1<sup>K38A</sup> immunostained with anti-TOM20 (red channel) and anti-Flag (green channel) monoclonal antibodies. In each image, boxed areas are shown at higher magnification in the bottom right corner. % of cells with the most frequent morphology is indicated: mock (tubular), altMiD51<sup>WT</sup> (fragmented), altMiD51<sup>LYR→AAA</sup> (tubular), Drp1<sup>K38A</sup> (elongated). Scale bar, 10 mm. (d) Bar graphs show mitochondrial morphologies in HeLa cells. Means of three independent experiments per condition are shown. \*\*\* $p < 0.0005$  (Fisher's exact test) for the three morphologies between altMiD51(WT) and the other experimental conditions.

Figure 14

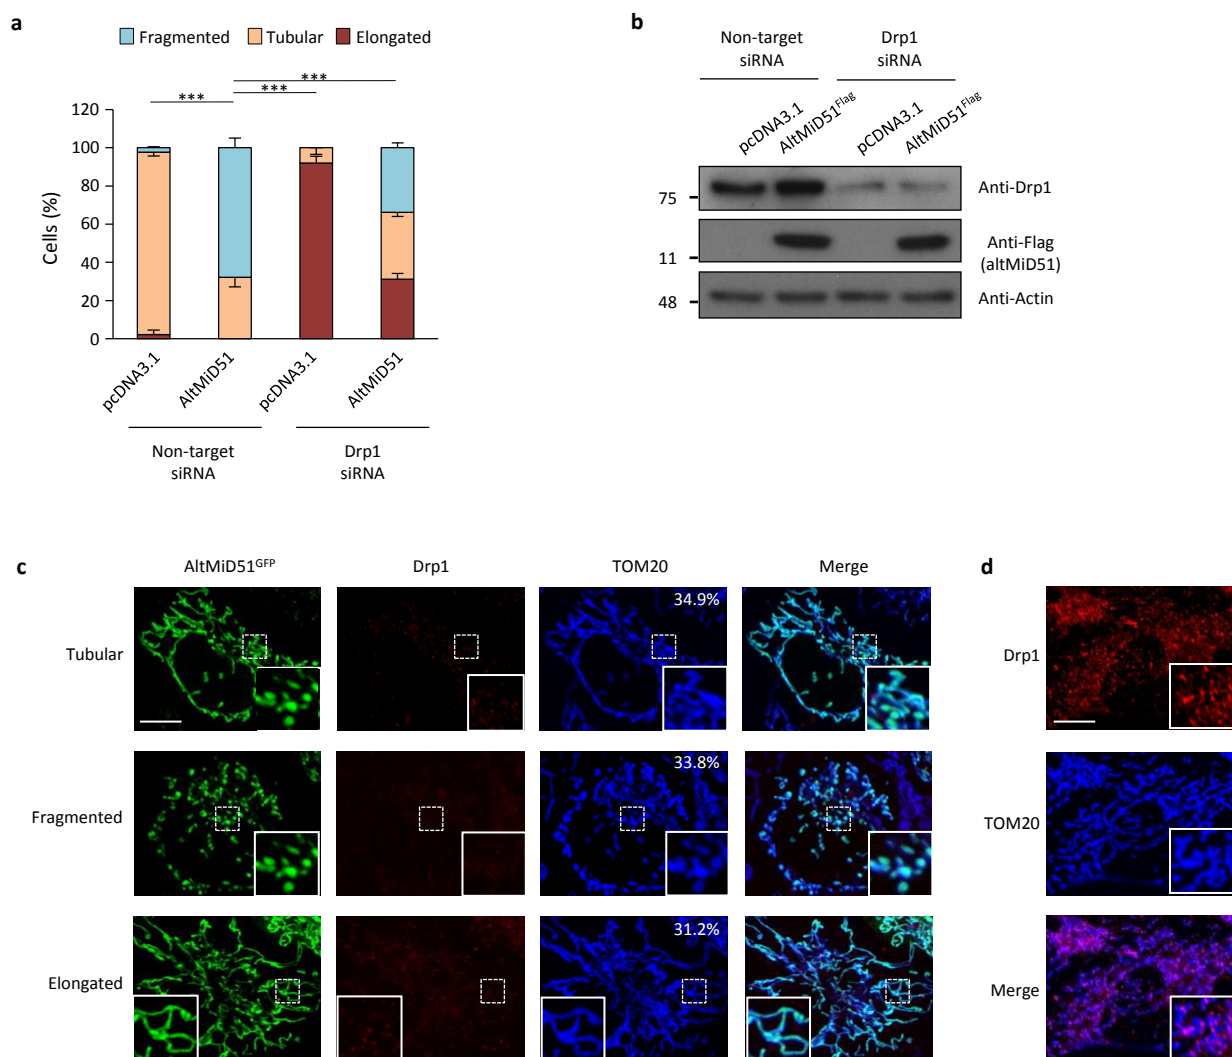

**Figure 14: AltMiD51-induced mitochondrial fragmentation is dependent on Drp1.**

(a) Bar graphs show mitochondrial morphologies in HeLa cells treated with non-target or Drp1 siRNAs. Cells were mock-transfected (pcDNA3.1) or transfected with altMiD51<sup>Flag</sup>. Means of three independent experiments per condition are shown. \*\*\* $p < 0.0005$  (Fisher's exact test) for the three morphologies between altMiD51 and the other experimental conditions. (b) HeLa cells treated with non-target or Drp1 siRNA were transfected with empty vector (pcDNA3.1) or altMiD51<sup>Flag</sup>, as indicated. Proteins were extracted and analyzed by western blot with antibodies against the Flag tag (altMiD51), Drp1 or actin, as indicated. Molecular weight markers are shown on the left (kDa). (c) Confocal microscopy of Drp1 knockdown cells transfected with altMiD51<sup>GFP</sup> immunostained with anti-TOM20 (blue channel) and anti-Drp1 (red channel) monoclonal antibodies. In each image, boxed areas are shown at higher magnification in the bottom right corner. % of cells with the indicated morphology is indicated on the TOM20 panels. Scale bar, 10  $\mu\text{m}$ . (d) Control Drp1 immunostaining in HeLa cells treated with a non-target siRNA. For (c) and (d), laser parameters for Drp1 and TOM20 immunostaining were identical.



Figure 13

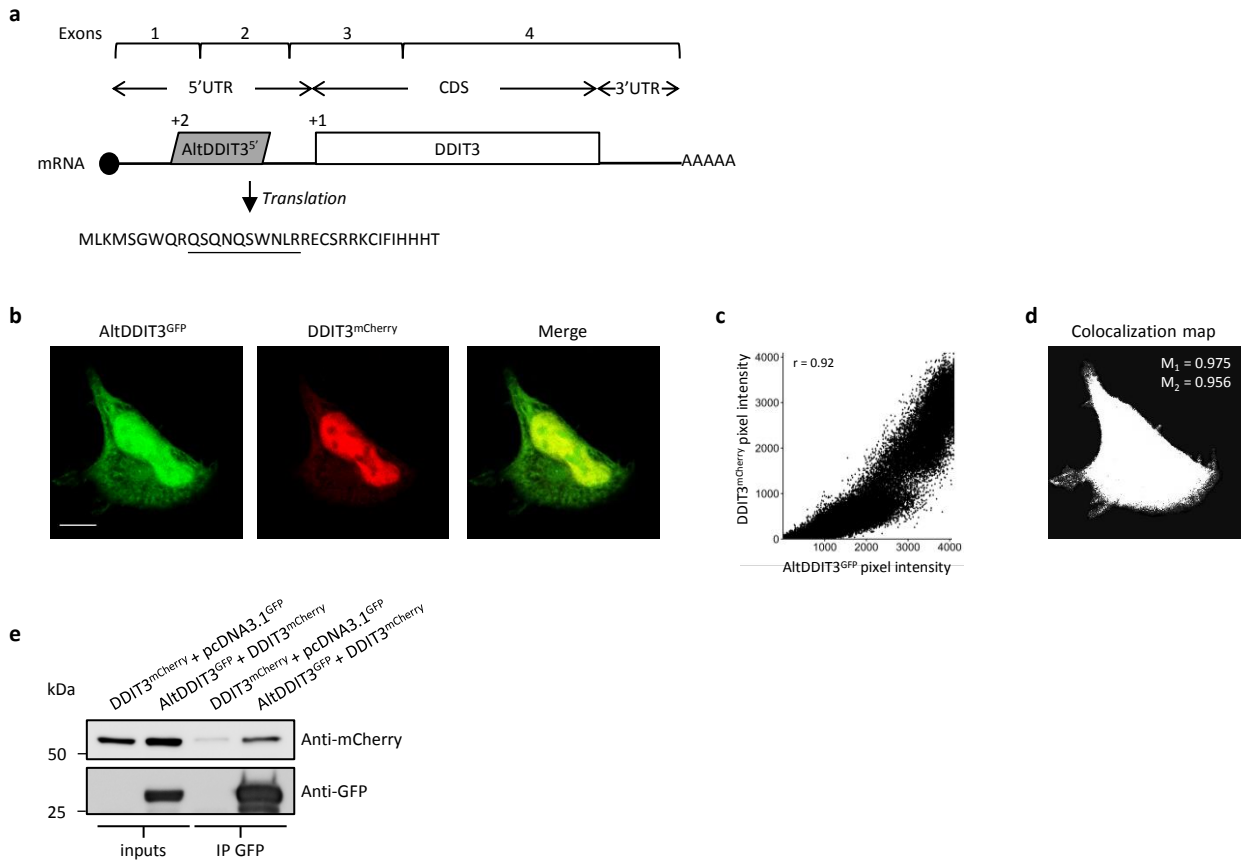

**Figure 15. AltDDIT3<sup>5</sup> co-localizes and interacts with DDIT3.**

(a) AltDDIT3<sup>5</sup> coding sequence is located in exons 1 and 2 of the *DDIT3/CHOP/GADD153* gene and in the 5'UTR of the canonical mRNA (RefSeq NM\_001195053). +2 and +1 indicate reading frames. AltDDIT3 amino acid sequence is shown with the underlined peptide detected by MS. (b) Confocal microscopy analyses of HeLa cells co-transfected with altDDIT3<sup>eGFP</sup> (green channel) and DDIT3<sup>mCherry</sup> (red channel). Scale bar, 10 μm. (c, d) Colocalization analysis of the images shown in (b) performed using the JACoP plugin (Just Another Co-localization Plugin) implemented in Image J software. (c) Scatterplot representing 50 % of green and red pixel intensities showing that altDDIT3<sup>GFP</sup> and DDIT3<sup>mCherry</sup> signal highly correlate (with Pearson correlation coefficient of 0.92 (p-value < 0.0001)). (d) Binary version of the image shown in (c) after Costes' automatic threshold. White pixels represent colocalization events (p-value < 0.001, based on 1000 rounds of Costes' randomization colocalization analysis). The associated Manders Correlation Coefficient, M<sub>1</sub> and M<sub>2</sub>, are shown in the right upper corner. M<sub>1</sub> is the proportion of altDDIT3<sup>GFP</sup> signal overlapping DDIT3<sup>mCherry</sup> signal and M<sub>2</sub> is the proportion of DDIT3<sup>mCherry</sup> signal overlapping altDDIT3<sup>GFP</sup>. (e) Representative immunoblot of co-immunoprecipitation with GFP-Trap agarose beads performed on HeLa lysates co-expressing DDIT3<sup>mCherry</sup> and altDDIT3<sup>GFP</sup> or DDIT3<sup>mCherry</sup> with pcDNA3.1<sup>GFP</sup> empty vector (n = 2).

**Table 1: AltORFs and alternative protein annotations in different organisms**

| Genomes                                                      | Features    |                     |                     |          |                                                     |                      |  |
|--------------------------------------------------------------|-------------|---------------------|---------------------|----------|-----------------------------------------------------|----------------------|--|
|                                                              | Transcripts |                     | Current annotations |          | Annotations of alternative protein coding sequences |                      |  |
|                                                              | mRNAs       | Others <sup>1</sup> | CDSs                | Proteins | altORFs                                             | Alternative proteins |  |
| <i>H. sapiens</i> GRCh38<br>RefSeq<br>GCF_000001405.26       | 67,765      | 11,755              | 68,066              | 51,818   | 539,895                                             | 183,191              |  |
| <i>P. troglodytes</i> 2.1.4<br>RefSeq<br>GCF_000001515.6     | 55,034      | 7,527               | 55,243              | 41,774   | 416,515                                             | 161,663              |  |
| <i>M. musculus</i> GRCm38p2,<br>RefSeq<br>GCF_000001635.22   | 73,450      | 18,886              | 73,551              | 53,573   | 642,203                                             | 215,472              |  |
| <i>B. Taurus</i> UMD3.1.86                                   | 22,089      | 838                 | 22,089              | 21,915   | 79,906                                              | 73,603               |  |
| <i>X. tropicalis</i> Ensembl<br>JGL_4.2                      | 28,462      | 4,644               | 28,462              | 22,614   | 141,894                                             | 69,917               |  |
| <i>D rerio</i><br>Ensembl ZV10.84                            | 44,198      | 8,196               | 44,198              | 41,460   | 214,628                                             | 150,510              |  |
| <i>D. melanogaster</i><br>RefSeq<br>GCA_000705575.1          | 30,255      | 3,474               | 30,715              | 20,995   | 174,771                                             | 71,705               |  |
| <i>C. elegans</i> WBcel235,<br>RefSeq<br>GCF_000002985.6     | 28,653      | 25,256              | 26,458              | 25,750   | 131,830                                             | 45,603               |  |
| <i>S. cerevisiae</i> YJM993_v1,<br>RefSeq<br>GCA_000662435.1 | 5,471       | 1,463               | 5,463               | 5,423    | 12,401                                              | 9,492                |  |

<sup>1</sup>Other transcripts include miRNAs, rRNAs, ncRNAs, snRNAs, snoRNAs, tRNAs. <sup>2</sup>Annotated retained-intron and processed transcripts were classified as mRNAs.

**Table 2: alternative zinc finger proteins detected by mass spectrometry (MS) and ribosome profiling (RP)**

| Alternative protein accession | Detection method <sup>1</sup> | Gene            | Amino acid sequence                                                                                                                                                                                                                                                                                                                                                                                                                                                                                                                                                                        | AltORF localization |
|-------------------------------|-------------------------------|-----------------|--------------------------------------------------------------------------------------------------------------------------------------------------------------------------------------------------------------------------------------------------------------------------------------------------------------------------------------------------------------------------------------------------------------------------------------------------------------------------------------------------------------------------------------------------------------------------------------------|---------------------|
| IP_238718.1                   | MS                            | RP11            | MLVEVACSSCRSLHKGAGASEDGAALEPAHTGGKENGATT                                                                                                                                                                                                                                                                                                                                                                                                                                                                                                                                                   | nc                  |
| IP_278905.1                   | MS and RP                     | ZNF761          | MSVARPLVGSHILYAIIIDFILERNLISVMSVARTLVRSHPLYAT<br>IDFILERNLTSVMSVARPLVRSQTLHAIVDFILEKNKCNECGE<br>VFNQQAHLGHHRIHTGEKP                                                                                                                                                                                                                                                                                                                                                                                                                                                                        | CDS                 |
| IP_278681.1                   | MS                            | ZNF468          | MNVARFLIKKQPLHITIDFILERNLTNGRNVTKVFSCSKNLKT<br>HKKIHIEEKPYRGKVC DKVFAYNAYLAKHTRIHTGEKLIISVM<br>SVARPLVKIHTL                                                                                                                                                                                                                                                                                                                                                                                                                                                                                | 3'                  |
| IP_106493.1                   | MS                            | ZNF717          | MWKNLSSQVIPHTPENSHGEKPYGCNECGKTFQCQSYLIIH<br>QRTHTGEKPYECNECGKSFHQKANLQKHQGIHTGEKPYECS<br>KCGKTLSEVSPHCTS                                                                                                                                                                                                                                                                                                                                                                                                                                                                                  | CDS                 |
| IP_278745.1                   | MS and RP                     | ZNF816          | MSVARPSVRNHPFNIAIYFTLERNLTVKNVMTMFTFADHTLK<br>DIGRFLERDHTNVRVTRFSGVIHTLQNIREFILERNHTSVINV<br>AGVSVGSHPFNTIIHFTLERNLTHVMNVARFLVEEKTLLHVIID<br>FMLERNLTVKNVTKFSVADHTLKDIGEFILGKNHTNVRVFT<br>RLSGVIAHALQTIREFILERNLTSVINVRRFLIKKESLHNIREFILE<br>RNLTSMNVARFLIKKQALQNIREFILQRNLTSVMSVAKPLL<br>DSQHLFTIKQSMGVGKLYKCNDCCHKVFSNATTIANHYRIHIE<br>ERSTSVINVANFSDVIHNL                                                                                                                                                                                                                               | CDS                 |
| IP_138289.1                   | MS                            | ZSCAN3<br>1     | MNIGGATLERNPINVRSVVGKPSVPAMASLDTEESTQGKNHM<br>NAKCVGRLSSSAHALFSIRGYTLERSAISVSVAKPSFRMQGF<br>SSISESTLVRNPISAVS AVNSLVSGHFLRNIRKSTLERDHKGDE<br>FGKAFSHHCNLRHFRIHTVPAELD                                                                                                                                                                                                                                                                                                                                                                                                                      | CDS                 |
| IP_278564.1                   | MS                            | ZNF808          | MIVTKSSVTLQQLQIIGESMMKRNLLSVINACFSDIVHTLQFI<br>GNLILERNLTVMIEARSSVKLHPMQNRRRIHTGEKPHKCDDC<br>GKAFTSHSHLVGHQRIHTGQKSKCHQCQKGVFSPRSLAEHE<br>KIHf                                                                                                                                                                                                                                                                                                                                                                                                                                             | 3'                  |
| IP_275012.1                   | MS                            | ZNF780<br>A     | MKPCECTECGKTFSCSSNIVQHVKIHTGEKRYNVRNMGKHLL<br>WMISCLNIRKFRIVRNFVTIRSVDKPSLCTKNLLNTRILMLRN<br>LVNIKECVKNFHHGLGFAQLLSIHTSEKSLSVRNVGRFIATLN<br>TLEFGEDNSCEKVFE                                                                                                                                                                                                                                                                                                                                                                                                                                | 3'                  |
| IP_204754.1                   | RP                            | ZFP91-<br>CNTF  | MPGETEPRPPEQQDQEGGEEAAKAAPEEPQQRPEAVAAAPA<br>GTTSSRVLRRGDRGRAAAAAAAAAVSRRRKAIEYPRRRSS<br>PSARPPDVPGQPQAASPSVPVQGKSPRLLCIEKVTTDKDPK<br>EEKEEEDSALPQEVIAASRPSRGWRSSRTSVSRHRDENTR<br>SSRSKTGSLQLICKSEPNTDQLDYDVGEEHQSPGGISSEEEEE<br>EEEMLISEEEIPFKDDPRDETYKPHLERETPKPRRKSQKVKKEE<br>KEKKEIKVEVEVEVEKEEENEIREDEEPPRKRGRRRKDDKSPRL<br>PKRRKKPPIQYVRCEMEGCGTVLAHPRYLQHHIKYQHLLKK<br>KYVCPHPSCGRLFRLQQLLRHAKHHTDQRDYICEYCARAF<br>KSSHNLAVHRMIHTGEKPLQCEICGFTCRQKASLNWHMCKKH<br>DADSFYQFSCNICGKKEFKKDSVVVAKAKSHPEVLIAEALAA<br>NAGALITSTDILGTNPESLTQPSDQGLPLPEPLGNSTSGECL<br>LLEAEGMSKSYCSGTERSIIHR | nc                  |
| IP_098649.1                   | RP                            | INO80B-<br>WBP1 | MSKLWRRGSTSGAMEAPEPEGEALELSLAGAHGHGVHKKKH<br>KKHKKKHHKHHQEEDAGTQPSPAKPQLKLIKLVGGQVLG<br>TKSVPTFTVIPEGPRSPSPLMVVDNEEEPMEGVPLEQYRAWL<br>DEDSNLSPSPLRDLSSGLGGQEEEEQRWLDALKEGELDDNG<br>DLKKEINERLLTARQRALLQKARSQSPMLPLV AEGCPPAL<br>TEEMLLKREERARKRRLQAARRAEHKNQTIERTLTKTAATSG<br>RGGRGARGERRGGRAAAPAPMVRYCSGAQGSTLSFPPGVP<br>APTAVSQRPSPSPPPRCSVPGCPHPRRYACSR TGQALCSLQC<br>YRINLQMRLLGGPEGPGSPLLATFESCAQE                                                                                                                                                                                    | nc                  |
| IP_115174.1                   | RP                            | ZNF721          | MYIGEFILERNPHTVENVAKPLDSLQIFMRIRKIFILERNPTRVE<br>TVAKPLDSLQIFMHIRKFILEIKPYKCKEKGAFKSYYSILKHK                                                                                                                                                                                                                                                                                                                                                                                                                                                                                               | CDS                 |

|             |    |             | RTHTRGMSYEGDECRGL                                                                                                                                                                                                                                                                                                                                          |           |
|-------------|----|-------------|------------------------------------------------------------------------------------------------------------------------------------------------------------------------------------------------------------------------------------------------------------------------------------------------------------------------------------------------------------|-----------|
| IP_275016.1 | RP | ZNF780<br>A | MNVRSVGKALIVVHTLFSIRKFIIPMRNLLYVGNVRWPLDIAN<br>LLNILEFILVTSHLNVKTVGRPSIVAQALFNIRVFTLVRSPMNV<br>RSVGRLLDFTYNFPNIRKLTQVKNHLNVRNVGNSFVVVQILI<br>NIEVFILERNPLNVRNVGKPFDFICTLFDIRNCILVRNPLNVRS<br>VGKPFDFICNLFDIRNCILVRNPLNVRNVERFLVFPPSLAIRTF<br>TQVRRHLECKEKGKSFNRVSNHVQHQSIRAGVKPCECKGCG<br>KGFICGSNVIQHQKHSSEKLFVCKEWRITFRYHYHLFNITKF<br>TLVKNPLNVKNVERPSVF | CDS or 3' |
| IP_278870.1 | RP | ZNF845      | MNVARFLIEKQNLHVIIIEFILERNIRNMKNVTKFTVVNQVLKD<br>RRIHTGEKAYKCKSL                                                                                                                                                                                                                                                                                            | CDS       |
| IP_278888.1 | RP | ZNF765      | MSVARPSAGRHLHTIIDFILDRNLTVKIVMKLSVSNQTLKD<br>IGEFILERNYTCNECGKTFNQELTLTCHRRLLHSGEKPYKYEEL<br>DKAYNFKSNLEIHQKIRTEENLTSVMSVARP                                                                                                                                                                                                                               | CDS       |
| IP_278918.1 | RP | ZNF813      | MNVARVLIGKHTLHVIIDFILERNLTSVMNVARFLIEKHTLHIII<br>DFILEINLTSVMNVARFLIKKHTLHVITIDFILERNLTSVMNVAR<br>FLIKKQTLHVIIDFILERNLTSLMSVAKLLIEKQSLHIIIQFILER<br>NKCNECGKTFCHNSVLVIHKNSYWRETSVMNVAKFLINKHT<br>FHVIIDFIVERNLNRNVKHVTKFTVANRASKDRRIHTGEKAYK<br>GEEYHRVFSHKSNLERHKINHTAEKP                                                                                 | CDS       |
| IP_280349.1 | RP | ZNF587      | MNAVNVGNHFFPALRFMFIKEFILDKSLISAVNVENPFLNVPV<br>SLNTGEFTLEKGLMNAPNVEKHFSEALPSFIIRVHTGERPYEC<br>SEYGKSFSAEASRLVKHRRVHTGERPYECCQCGKHQNVCCPR<br>S                                                                                                                                                                                                              | CDS       |
| IP_280385.1 | RP | ZNF417      | MNAMNVGNHFFPALRFMFIKEFILDKSLISAVNVENPLLNV<br>VSLNTGEFTLEKGLMNVPNVEKHFSEALPSFIIRVHTGERPYE<br>CSEYGKSFSAETSRLIKHRRVHTGERPYECCQSGKHQNVCS<br>S                                                                                                                                                                                                                 | CDS       |

<sup>1</sup>MS, mass spectrometry; RP, ribosome profiling.

**Table 3: Examples of proteins encoded in the same gene and functionally interacting**

| Gene           | Polypeptides <sup>1</sup>                                                                               | Reference |
|----------------|---------------------------------------------------------------------------------------------------------|-----------|
| CDKN2A, INK4   | Cyclin-dependent kinase inhibitor 2A or p16-INK4 (P42771), and p19ARF (Q8N726)                          | (47)      |
| GNAS, XLalphas | Guanine nucleotide-binding protein G(s) subunit alpha isoforms XL $\alpha$ s (Q5JWF2) and Alex (P84996) | (48)      |
| ATXN1          | Ataxin-1 (P54253) and altAtaxin-1                                                                       | (49)      |
| Adora2A        | A2A adenosine receptor (P30543) and uORF5                                                               | (50)      |
| AGTR1          | Angiotensin type 1a receptor (P25095) and PEP7                                                          | (51)      |

<sup>1</sup>The UniProtKB accession is indicated when available.

**Table 4: orthology and co-conservation assessment of alternative-reference protein pairs between *H. sapiens* and other species**

|                        | A                                       | B                    | C                                  | D                        | E                                                         | F                     | G                                 | H                                                                   | I                                                         | J                        |
|------------------------|-----------------------------------------|----------------------|------------------------------------|--------------------------|-----------------------------------------------------------|-----------------------|-----------------------------------|---------------------------------------------------------------------|-----------------------------------------------------------|--------------------------|
|                        |                                         |                      |                                    |                          |                                                           | Observed              | Mean expected                     | Max expected                                                        |                                                           |                          |
|                        | Orthologous altProts (of 183,191 total) | Orthologous refProts | Co-conserved altProt-refProt pairs | Non-orthologous altProts | Non-orthologous altProts paired with orthologous refProts | Co-conservation (C/A) | % orthologous refProts (B/51,819) | % non-orthologous altProts paired with an orthologous refProt (E/D) | Max % of 1 million binomial simulations, p=max(G, H), n=A | Inferred <i>p</i> -value |
| <i>P. troglodytes</i>  | 113,687                                 | 25,755               | 100,839                            | 69,504                   | 30,772                                                    | 88.69                 | 49.70                             | 44.27                                                               | 50.39                                                     | <1e-06                   |
| <i>M. musculus</i>     | 25,930                                  | 22,304               | 24,862                             | 157,261                  | 106,987                                                   | 95.88                 | 43.04                             | 68.031                                                              | 69.39                                                     | <1e-06                   |
| <i>B. taurus</i>       | 25,868                                  | 16,887               | 24,426                             | 157,323                  | 99,369                                                    | 94.42                 | 32.58                             | 63.16                                                               | 64.67                                                     | <1e-06                   |
| <i>X. tropicalis</i>   | 2,470                                   | 12,458               | 1,974                              | 180,721                  | 95,499                                                    | 79.91                 | 24.04                             | 52.84                                                               | 57.81                                                     | <1e-06                   |
| <i>D. rerio</i>        | 2,023                                   | 12,791               | 1,203                              | 181,168                  | 94,426                                                    | 59.46                 | 24.68                             | 52.12                                                               | 57.29                                                     | <1e-06                   |
| <i>D. melanogaster</i> | 115                                     | 4,881                | 51                                 | 183,076                  | 34,352                                                    | 44.34                 | 9.41                              | 18.76                                                               | 38.26                                                     | <1e-06                   |
| <i>C. elegans</i>      | 34                                      | 3,954                | 8                                  | 183,157                  | 26,839                                                    | 23.52                 | 7.63                              | 14.65                                                               | 50.00                                                     | 0.02                     |
| <i>S. cerevisiae</i>   | 6                                       | 1,854                | 2                                  | 183,185                  | 10,935                                                    | 33.33                 | 3.57                              | 5.96                                                                | 83.33                                                     | 0.04                     |

In order to compare the observed co-conservation to expected co-conservation, we used the more conservative of two expected values: either the percentage of all refProts (called here reference proteins) that were defined as orthologous (column G), or the percentage of non-orthologous altProts (called here alternative proteins) that were paired with an orthologous refProt. Both of these methods are themselves conservative, as they do not account for the conservation of the pairing. The larger of these values for each species was then used to generate 1 million random binomial distributions with  $n=\#$  of orthologous altProts; the maximum of these percentages is reported in column I.

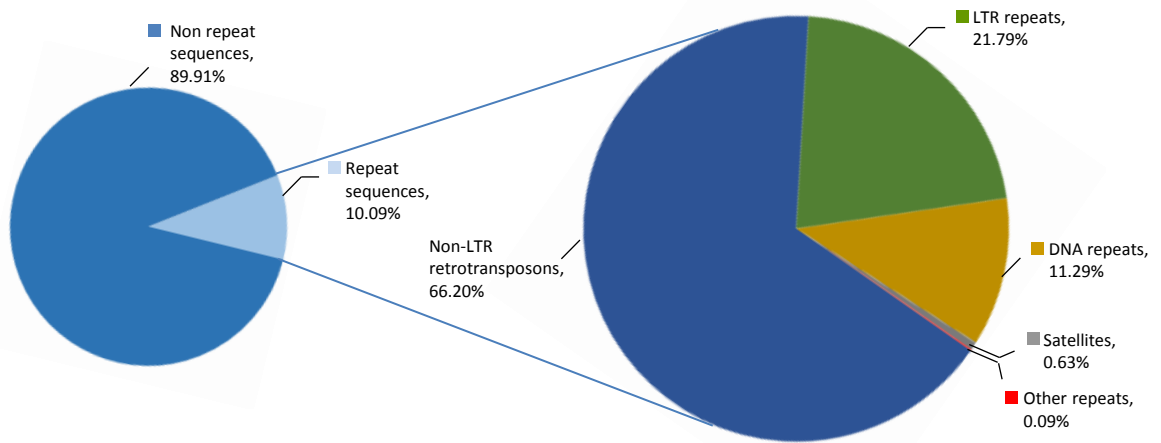

**Figure 1-figure supplement 1: 10% of altORFs are present in different classes of repeats.**

More than half of the human genome is composed of repeated sequences, and only 10.09% of altORFs are located inside these repeats. These altORFs are detected in non-LTR retrotransposons, LTR repeats, DNA repeats, satellites and other repeats. Proportions were determined using RepeatMasker (version 3.3.0).

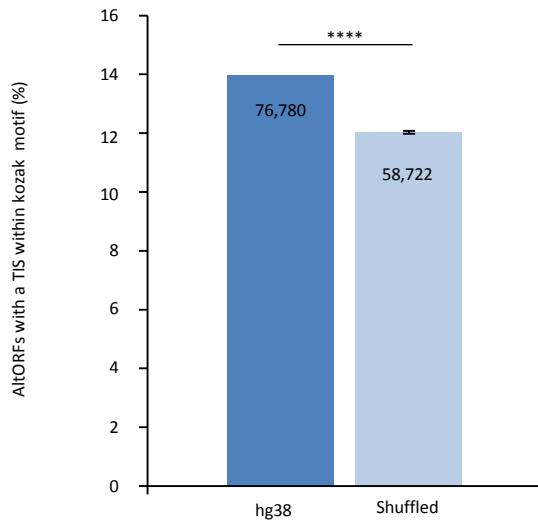

**Figure 1-figure supplement 2: The proportion of altORFs with a translation initiation site (TIS) with a Kozak motif in hg38 is significantly different from 100 shuffled hg38 transcriptomes.**

Percentage of altORFs with a TIS within an optimal Kozak sequence in hg38 (dark blue) compared to 100 shuffled hg38 (light blue). Mean and standard deviations for sequence shuffling are displayed, and significant difference was defined by using one sample t test. \*\*\*\*  $P < 0,0001$ . Note that shuffling all transcripts in the hg38 transcriptome generates a total of 489,073 altORFs on average, compared to 551,380 altORFs in hg38. Most transcripts result from alternative splicing and there are 183,191 unique altORFs in the hg38 transcriptome, while the 489,073 altORFs in shuffled transcriptomes are all unique. Figure 1g shows the percentage of unique altORFs with a kozak motif (15%), while the current Fig. shows the percentage of altORFs with a kozak motif relative to the total number of altORFs (14%).



a

AltLINC01420<sup>nc</sup>

MGDQPCASGRSTLPPGNAREAKPPKKRCLLAPRWDYEGTPNGGSTLLPSAPPASAGLKSHPPPPEK

b

Spectrum & Fragment Ions (PR - NH2-WDY<p>PEGTPNGGSTLLPSAPPASAGLK-COOH - SH 3+ 917.09 m/z)

□\_+?

NH2-W D Y P E G T P N G G S T T L P S A P P P A S A G L K-COOH

m/z = 917.09  
[M+3H]<sup>3+</sup> = 2751.27 Da

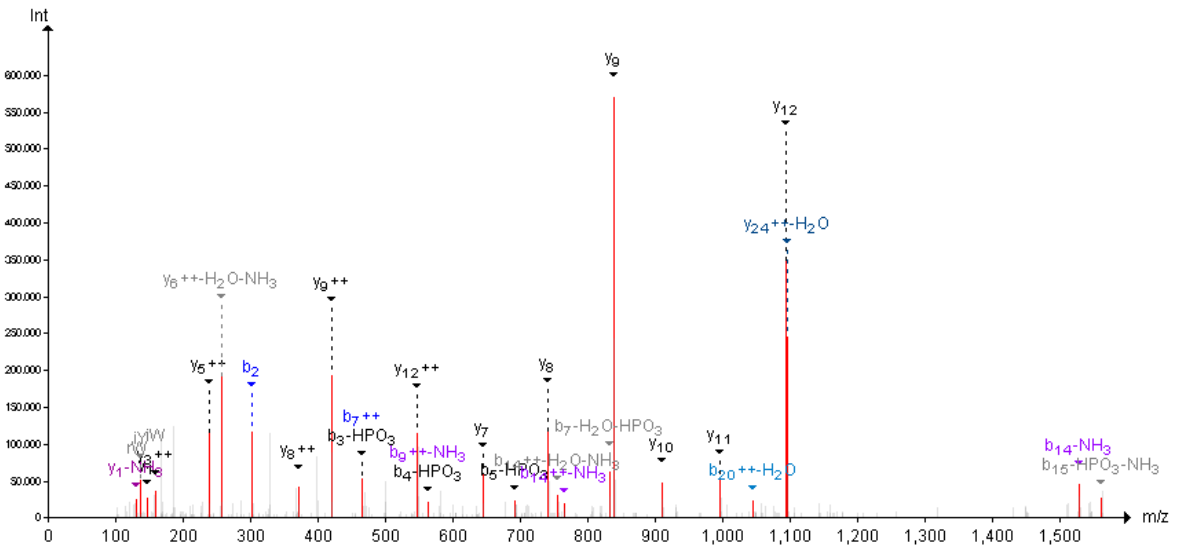

c

Spectrum & Fragment Ions (PR - NH2-WDYEGTPNGGSTLLPSAPPASAGLK-COOH - SH 3+ 890.43 m/z)

□\_+?

NH2-W D Y P E G T P N G G S T T L P S A P P P A S A G L K-COOH

m/z = 890.43.09  
[M+3H]<sup>3+</sup> = 2671.29 Da

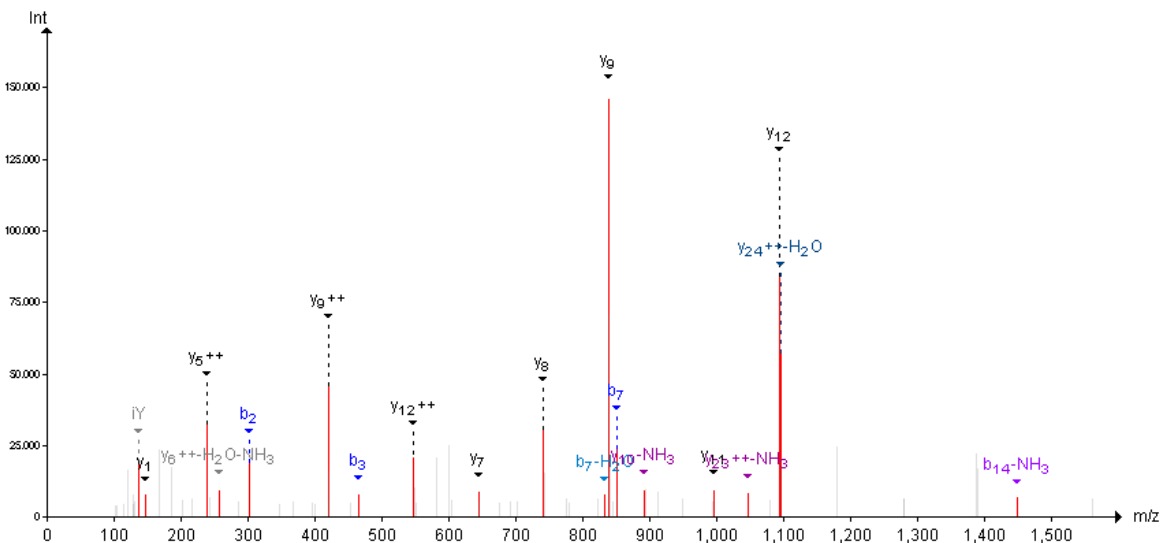

**Figure 6-figure supplement 1: Example of a phosphorylated peptide in mitosis - alternative protein AltLINC01420<sup>nc</sup>.**

(a) AltLINC01420<sup>nc</sup> amino acid sequence with detected peptides underlined and phosphorylated peptide in bold (73,9% sequence coverage). (b) MS/MS spectrum for the phosphorylated peptide (PeptideShaker graphic interface output). The phosphorylation site is the tyrosine residue, position 2. (c) MS/MS spectrum for the non-phosphorylated peptide. The mass difference between the precursor ions between both spectra corresponds to that of a phosphorylation, confirming the specific phosphorylation of this residue in mitosis.

**a.** **AltTFAM<sup>37</sup>**  
 MSYINISGQMQRKHLCSYPAGKFPLSSFNINYPYFILNIHIIPSQIYWVQC

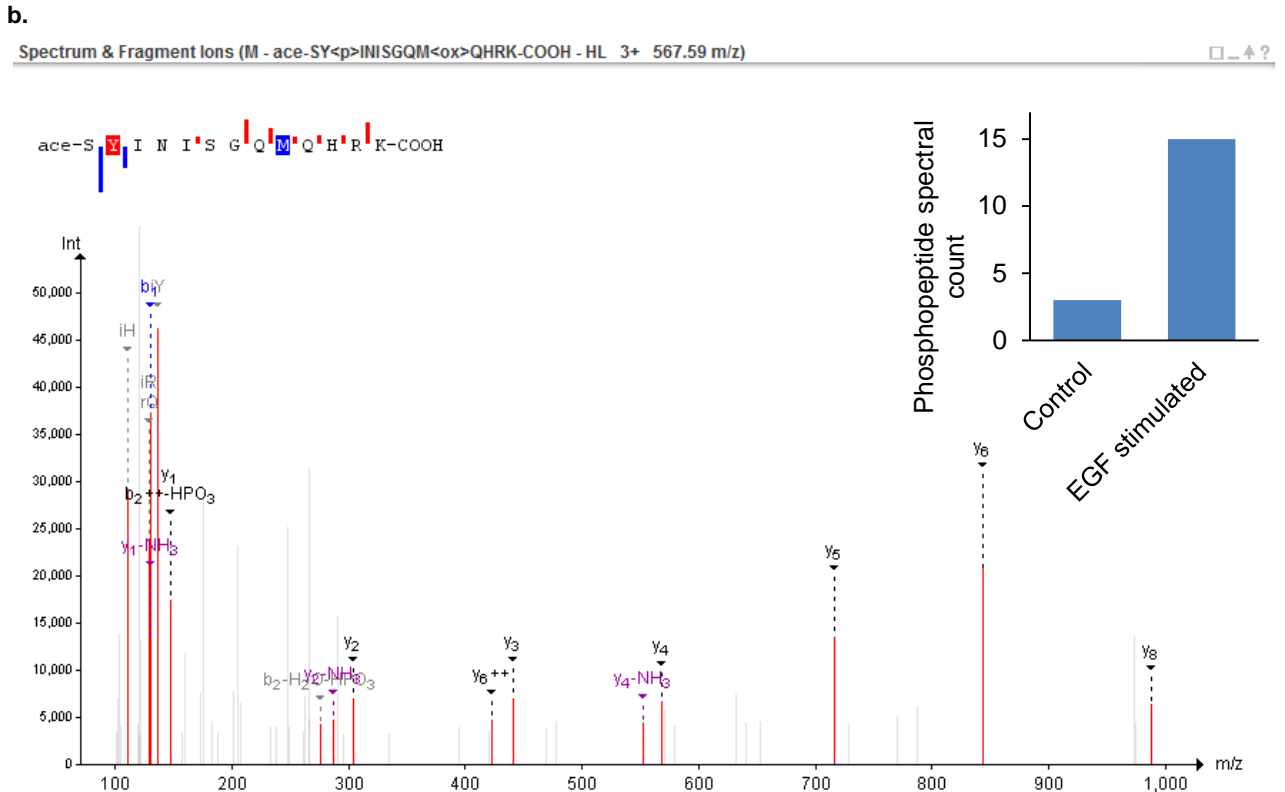

**Figure 6-figure supplement 2: Example of a phosphorylated peptide in EGF-treated cells - alternative protein AltTFAM<sup>37</sup>.**

(a) AltTFAM<sup>37</sup> amino acid sequence with the detected phosphorylated peptide underlined (22,2% sequence coverage). (b) MS/MS spectrum for the phosphorylated peptide (PeptideShaker graphic interface output). The phosphorylation site is a tyrosine residue, position 2. The difference in spectral counting indicates an increase in phosphorylation in cells stimulated with EGF.

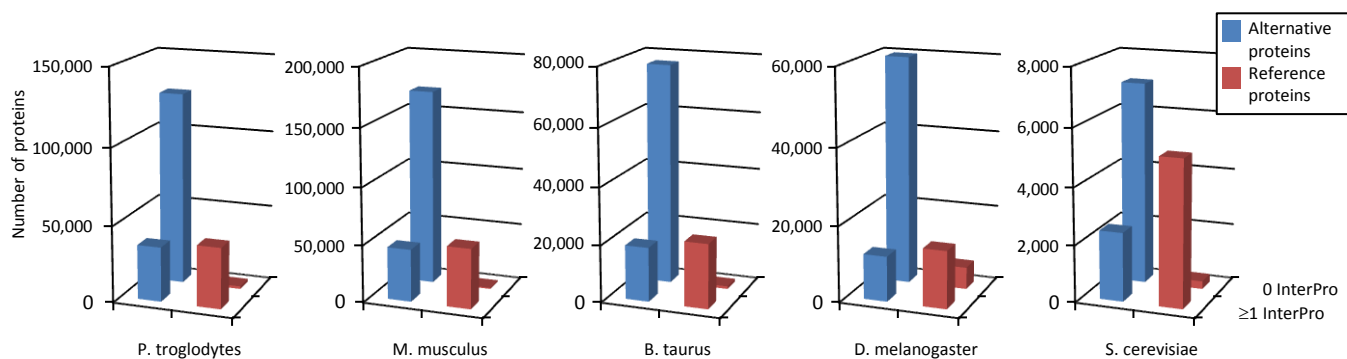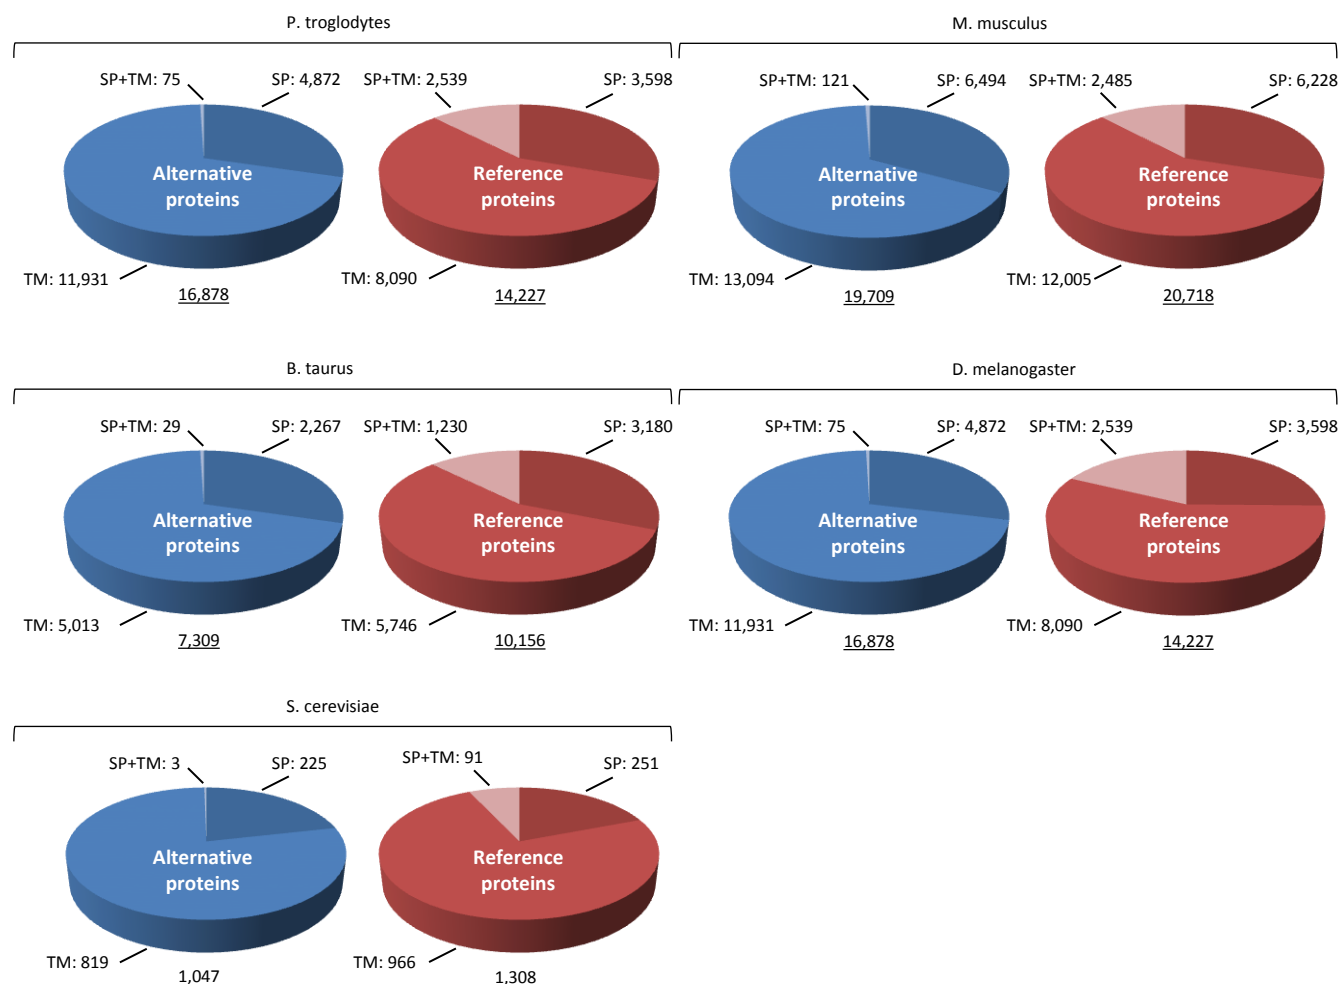

**Figure 8-figure supplement 1: Alternative proteome sequence analysis and classification in *P. troglodytes*, *M. musculus*, *B. Taurus*, *D. melanogaster* and *S. cerevisiae*.**

For each organism, the number of InterPro signatures (top graphs) and proteins with transmembrane (TM), signal peptide (SP), or TM+SP features (bottom pie charts) is indicated for alternative and reference proteins.

**Figure 12-figure supplement 1: Matrix of co-occurrence of InterPro entries between alternative/reference protein pairs coded by the same transcript.**

Pixels show the number of times entries co-occur in reference and alternative proteins. Blue pixels indicate that these domains are not shared, white pixels indicate that they are shared once, and red that they are shared twice or more.

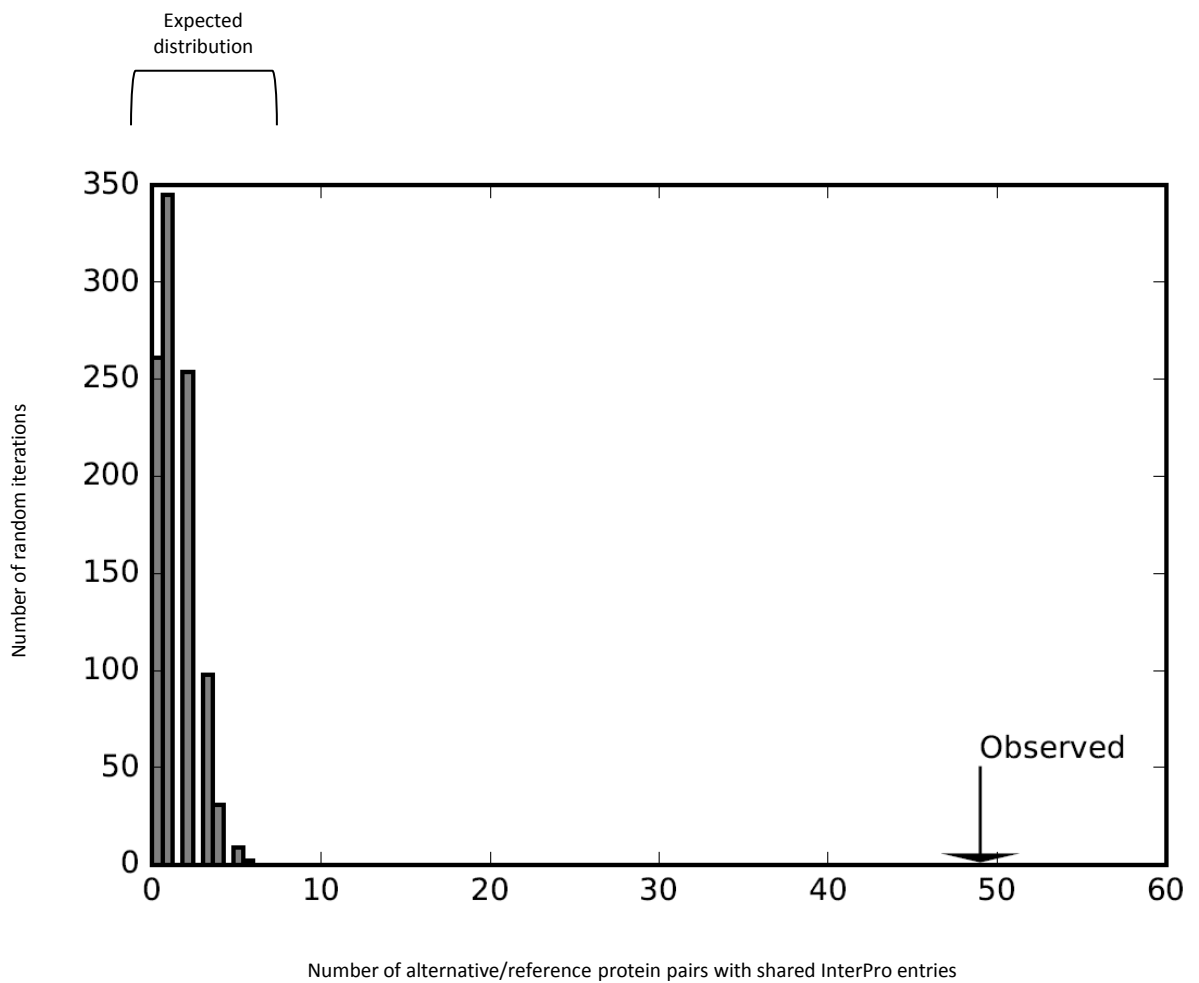

**Figure 12-figure supplement 2: Reference and alternative proteins share functional domains.**

The number of reference/alternative protein pairs that share domains ( $n = 49$ ) is higher than expected by chance alone ( $p < 0.001$ ). The distribution of expected pairs sharing domains and the observed number are shown. This is the same analysis as the one presented in figure 12b, with the zinc finger domains taken out.

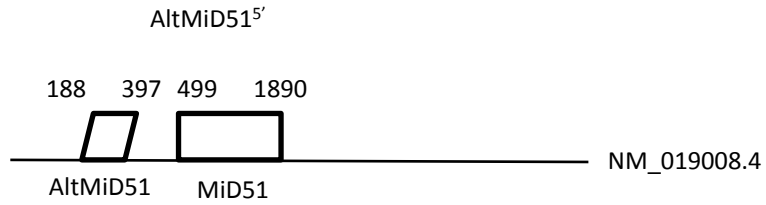

**a. Experimental peptide**

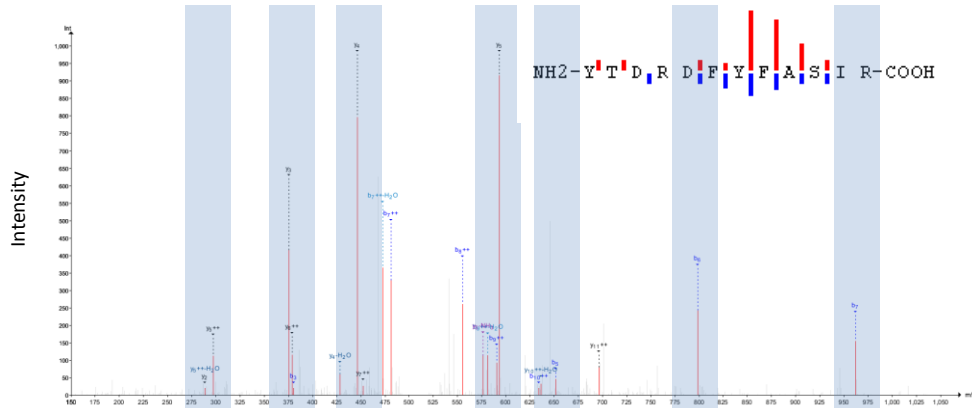

**b. Synthetic peptide**

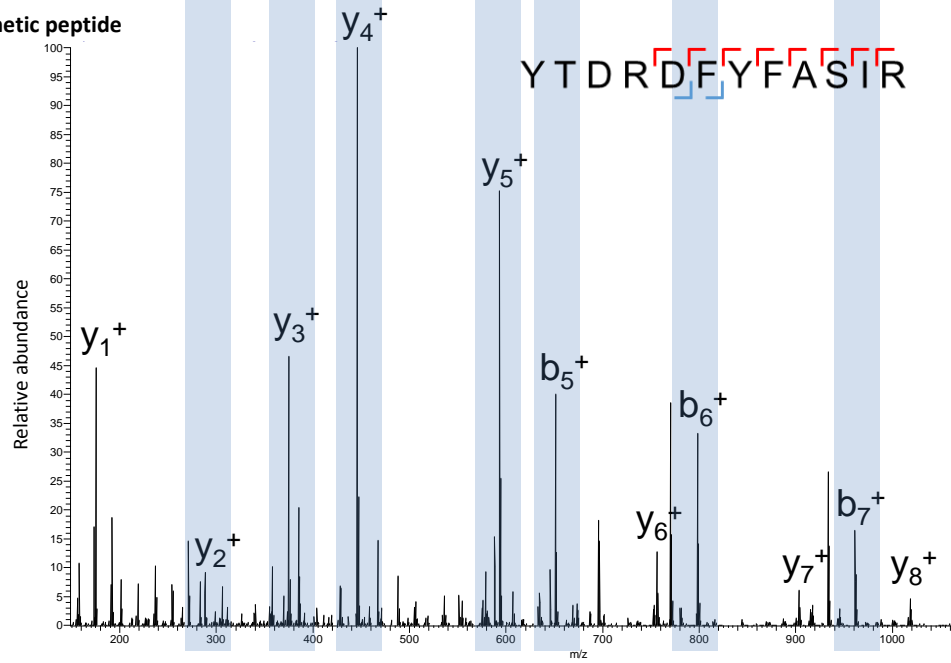

### c. Experimental peptide

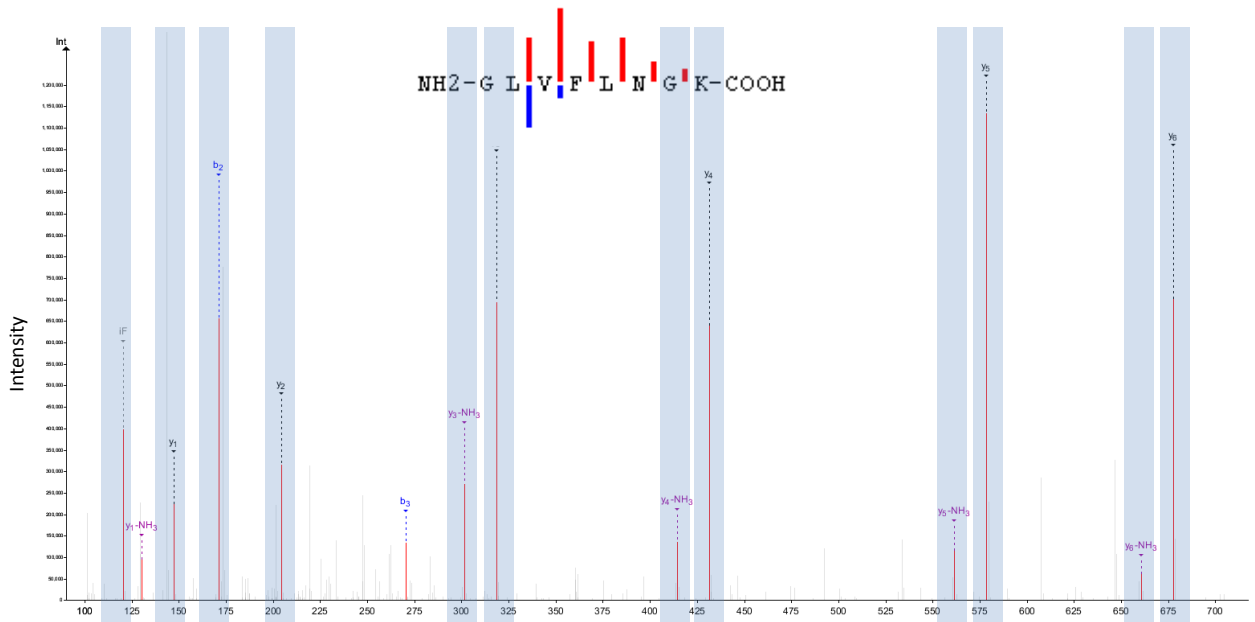

### d. Synthetic peptide

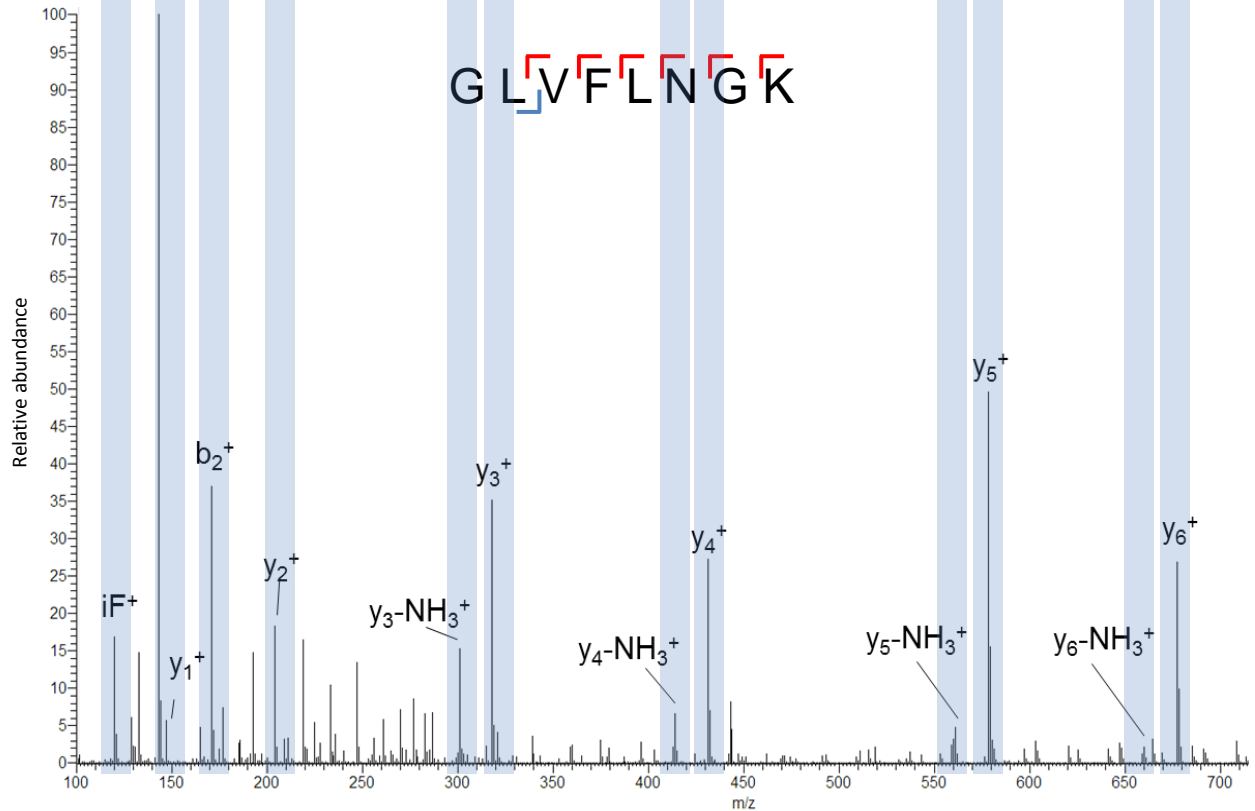

### Figure 13-figure supplement 1: Spectra validation for altMiD51.

Example of validation for altMiD51 specific peptides YTDRDFYFASIR and GLVFLNGK. (a,c) Experimental MS/MS spectra (PeptideShaker graphic interface output). (b,d) MS/MS spectra of the synthetic peptides.

Matching peaks are shown with blue masks. A diagram of the transcript with its accession number and the localization of the altORF and the CDS is shown at the top.



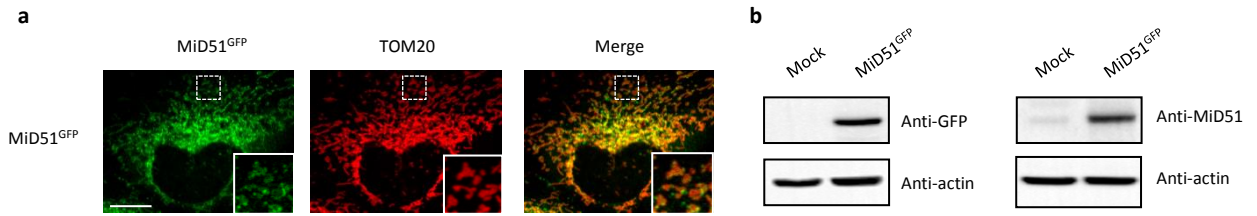

**Figure 13-figure supplement 2: MiD51 expression results in mitochondrial fission.**

(a) Confocal microscopy of HeLa cells transfected with MiD51<sup>GFP</sup> immunostained with anti-TOM20 (red channel) monoclonal antibodies. In each image, boxed areas are shown at higher magnification in the bottom right corner. The localization of MiD51 in fission sites is shown in merged higher magnification inset. Scale bar, 10 μm. (b) Human HeLa cells transfected with empty vector (mock) or MiD51<sup>GFP</sup> were lysed and analyzed by western blot to confirm MiD51<sup>GFP</sup> expression.

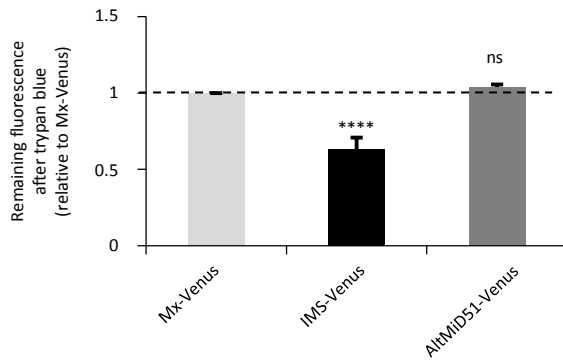

**Figure 13-figure supplement 3: AltMiD51 is localized in the mitochondrial matrix.**

Trypan blue quenching experiment performed on HeLa cells stably expressing the indicated constructs. The fluorescence remaining after quenching by trypan blue is shown relative to Matrix-Venus (Mx-Venus) indicated by the dashed line. (\*\*\*\*  $p < 0,0001$ , one-way ANOVA). The absence of quenching of the fluorescence compared to IMS-Venus indicates the matricial localization of altMiD51.  $n \geq 3$  cells were quantified per experiment, and results are from 6 independent experiments. Data are mean  $\pm$ SEM.

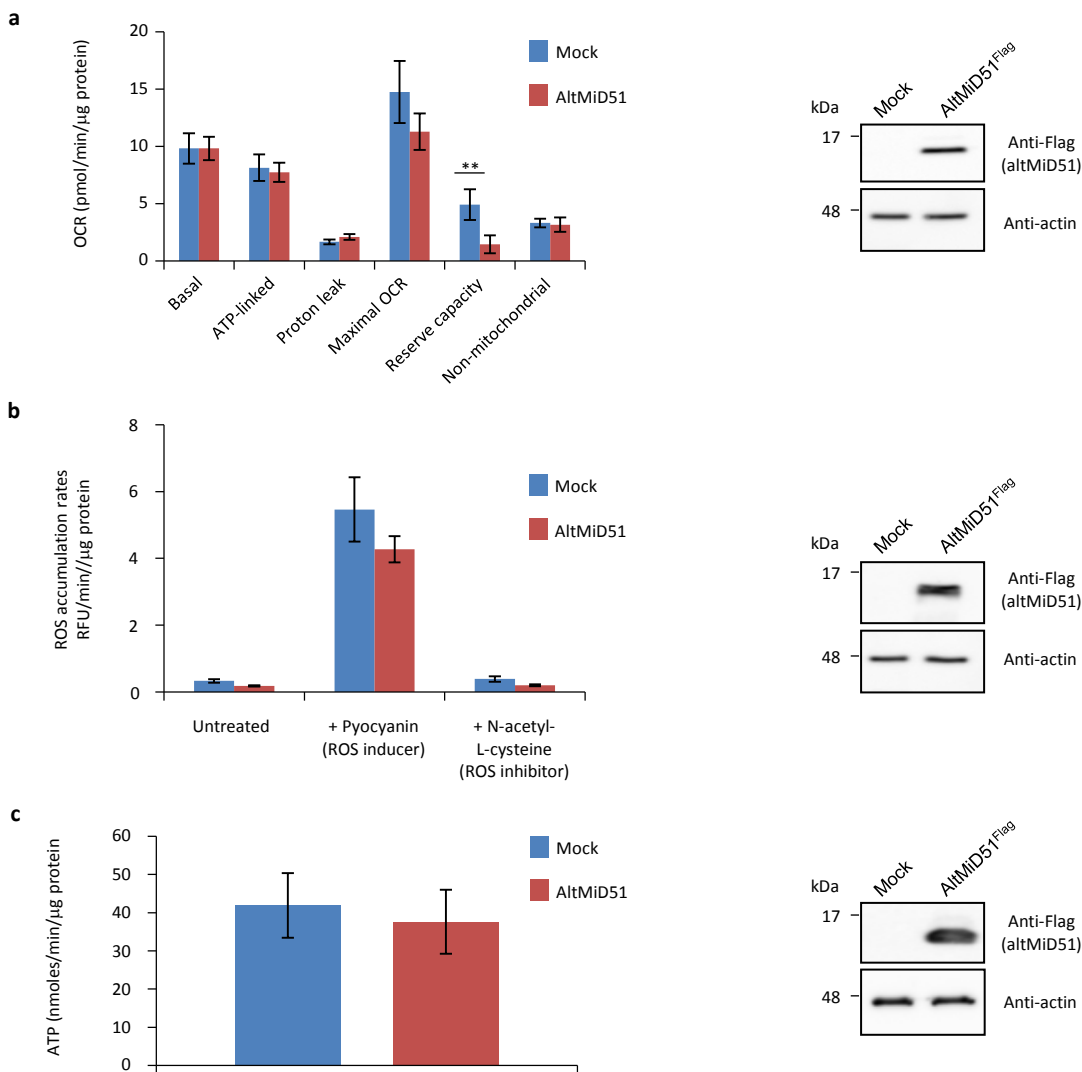

#### Figure 13-figure supplement 4: Mitochondrial function parameters.

(a) Oxygen consumption rates (OCR) in HeLa cells transfected with empty vector (mock) or altMiD51<sup>Flag</sup>. Mitochondrial function parameters were assessed in basal conditions (basal), in the presence of oligomycin to inhibit the ATP synthase (oxygen consumption that is ATP-linked), FCCP to uncouple the mitochondrial inner membrane and allow for maximum electron flux through the respiratory chain (maximal OCR), and antimycin A/rotenone to inhibit complex III (non-mitochondrial). The balance of the basal OCR comprises oxygen consumption due to proton leak and nonmitochondrial sources. The mitochondrial reserve capacity (maximal OCR- basal OCR) is an indicator of rapid adaptation to stress and metabolic changes. Mean values of replicates are plotted with error bars corresponding to the 95% confidence intervals. Statistical significance was estimated using a two-way ANOVA with Tukey's post-hoc test (\*\* $p = 0,004$ ). (b) ROS production in mock and altMiD51-expressing cells. Cells were untreated, treated with a ROS inducer or a ROS inhibitor. Results represent the mean value out of three independent experiments, with error bars corresponding to the standard error of the mean (s.e.m.). Statistical significance was estimated using unpaired T-test. (c) ATP synthesis rate in mock and altMiD51-expressing cells. No significant differences in ATP production were observed between mock and altMiD51 transfected cells. Results represent the mean of mitochondrial ATP production out of three independent experiments. Error bars represent the standard error of the mean.

At the end of the experiments, cells were collected and proteins analyzed by western blot with antibodies against the Flag tag (altMiD51) or actin, as indicated, to verify the expression of altMiD51. A representative western blot is shown on the right. Molecular weight markers are shown on the left (kDa).

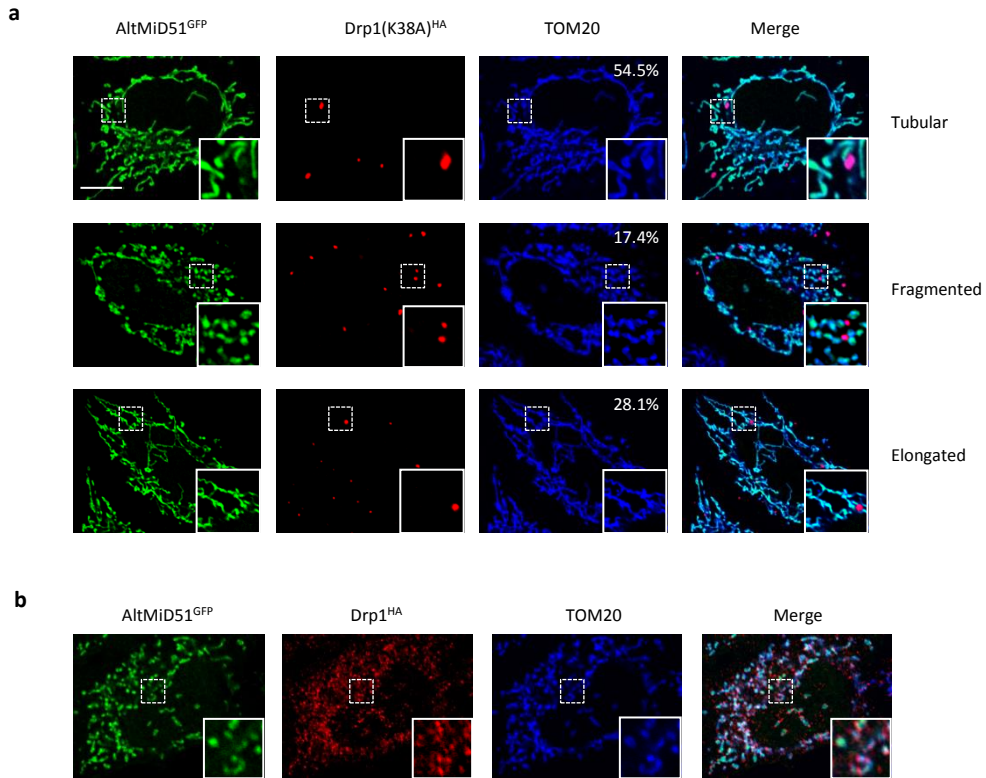

**Figure 13-figure supplement 5: Representative confocal images of cells co-expressing altMiD51<sup>GFP</sup> and Drp1(K38A)<sup>HA</sup>.**

(a) Confocal microscopy of HeLa cells co-transfected with altMiD51<sup>GFP</sup> and Drp1(K38A)<sup>HA</sup> immunostained with anti-TOM20 (blue channel) and anti-HA (red channel) monoclonal antibodies. In each image, boxed areas are shown at higher magnification in the bottom right corner. % of cells with the indicated morphology is indicated on the TOM20 panels. (b) Confocal microscopy of HeLa cells co-transfected with altMiD51<sup>GFP</sup> and Drp1(wt)<sup>HA</sup> immunostained with anti-TOM20 (blue channel) and anti-HA (red channel) monoclonal antibodies. In each image, boxed areas are shown at higher magnification in the bottom right corner. Scale bar, 10  $\mu$ m.

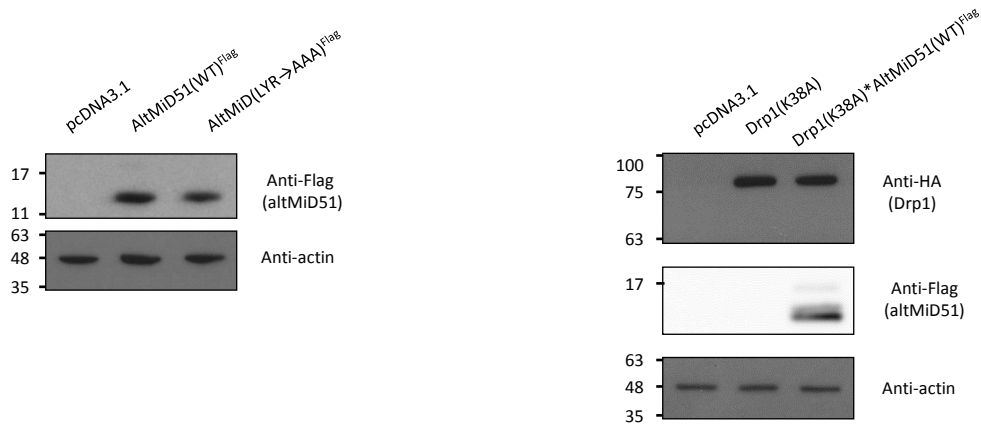

**Figure 13-figure supplement 6: Protein immunoblot showing the expression of different constructs in HeLa cells.**

HeLa cells were transfected with empty vector (pcDNA3.1), altMiD51(WT)<sup>Flag</sup>, altMiD51(LYR→AAA)<sup>Flag</sup>, Drp1(K38A)<sup>HA</sup>, or Drp1(K38A)<sup>HA</sup> and altMiD51(WT)<sup>Flag</sup>, as indicated. Proteins were extracted and analyzed by western blot with antibodies against the Flag tag (altMiD51), the HA tag (Drp1K38A) or actin, as indicated. Molecular weight markers are shown on the left (kDa).

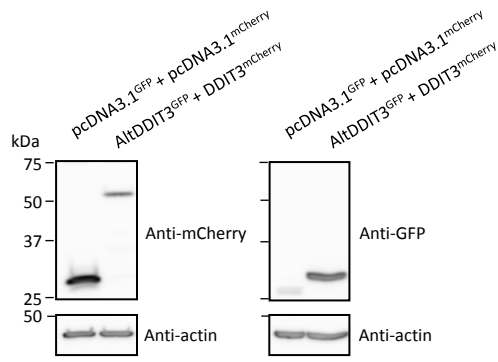

**Figure 15-figure supplement 1: Protein immunoblot showing the expression of different constructs in HeLa cells.**

HeLa cells were co-transfected with GFP and mCherry, or altDDIT3<sup>GFP</sup> and DDIT3<sup>mCherry</sup>, as indicated. Proteins were extracted and analyzed by western blot with antibodies, as indicated. Molecular weight markers are shown on the left (kDa). AltDDIT3 has a predicted molecular weight of 4.28 kDa and thus migrates at its expected molecular weight when tagged with GFP (~32 kDa).

AltSLC35A4<sup>5'</sup>

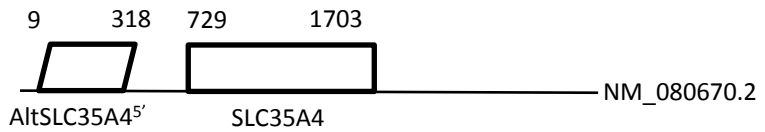

**a. Experimental peptide**

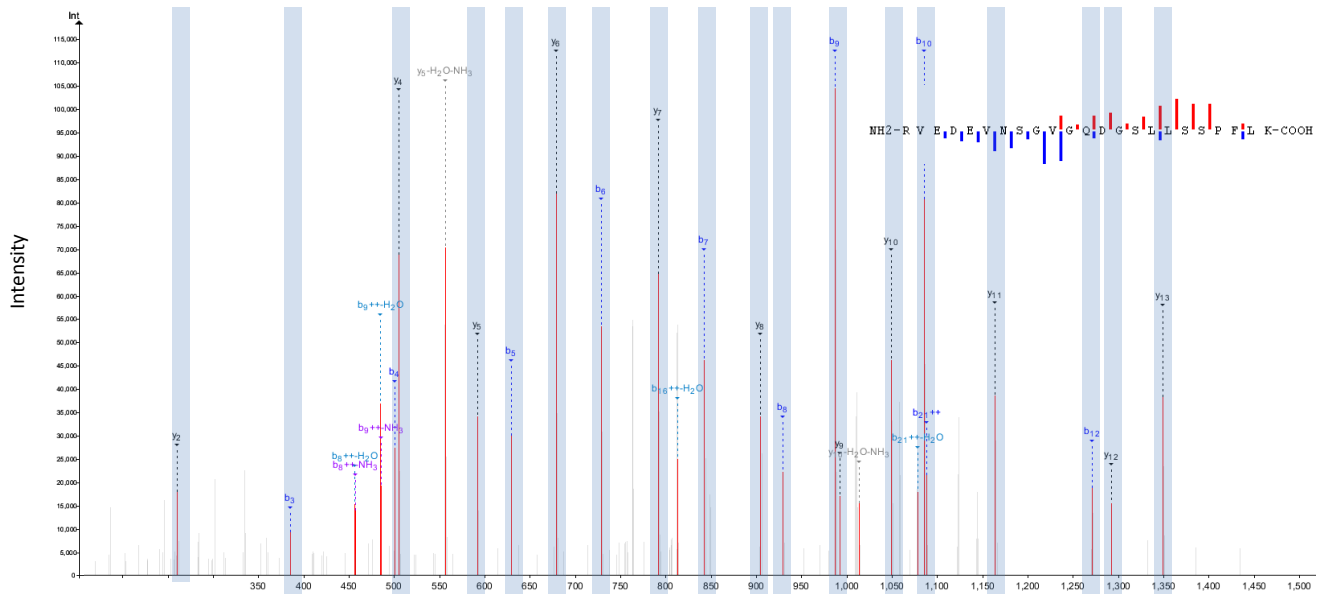

**b. Synthetic peptide**

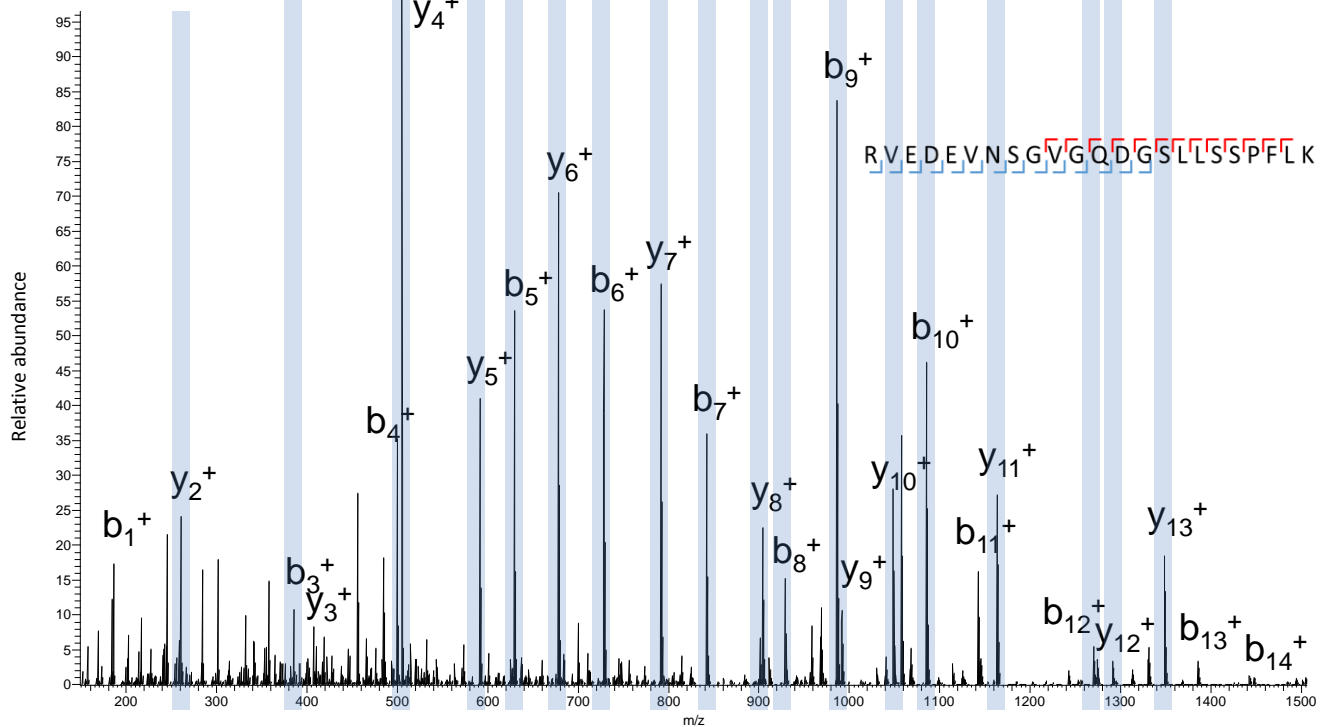

**Supplementary Figure 1: Spectra validation for altSLC35A4<sup>5'</sup>**

Example of validation for altSLC35A4<sup>5'</sup> specific peptide

RVEDEVNSGVGQDGSLLSSPFLK. (a) Experimental MS/MS spectra (PeptideShaker graphic interface output). (b) MS/MS spectra of the synthetic peptide.

Matching peaks are shown with blue masks. A diagram of the transcript with its accession number and the localization of the altORF and the CDS is shown at the top.

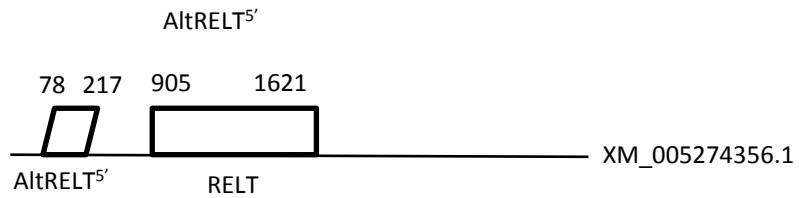

**a. Experimental peptide**

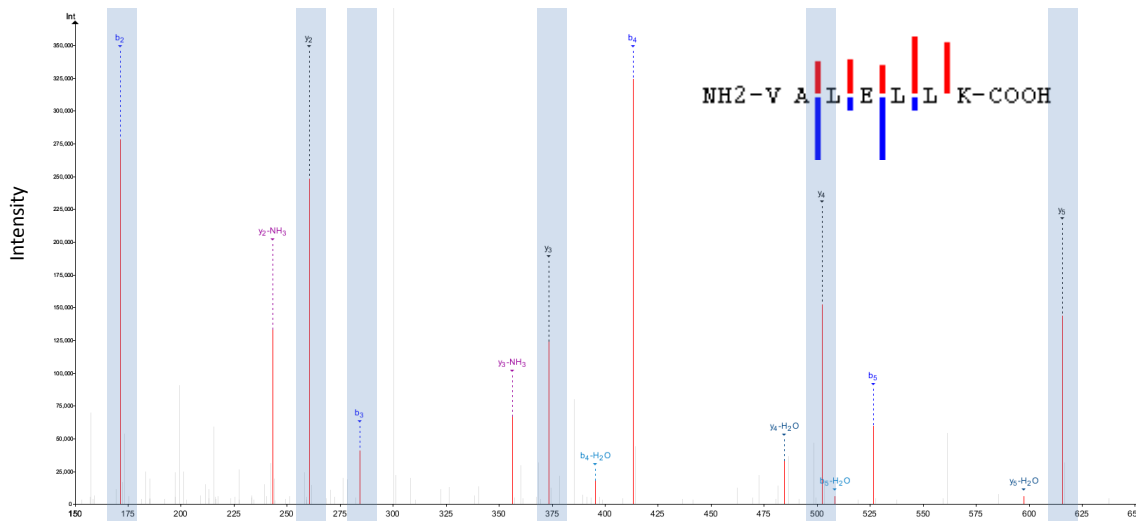

**b. Synthetic peptide**

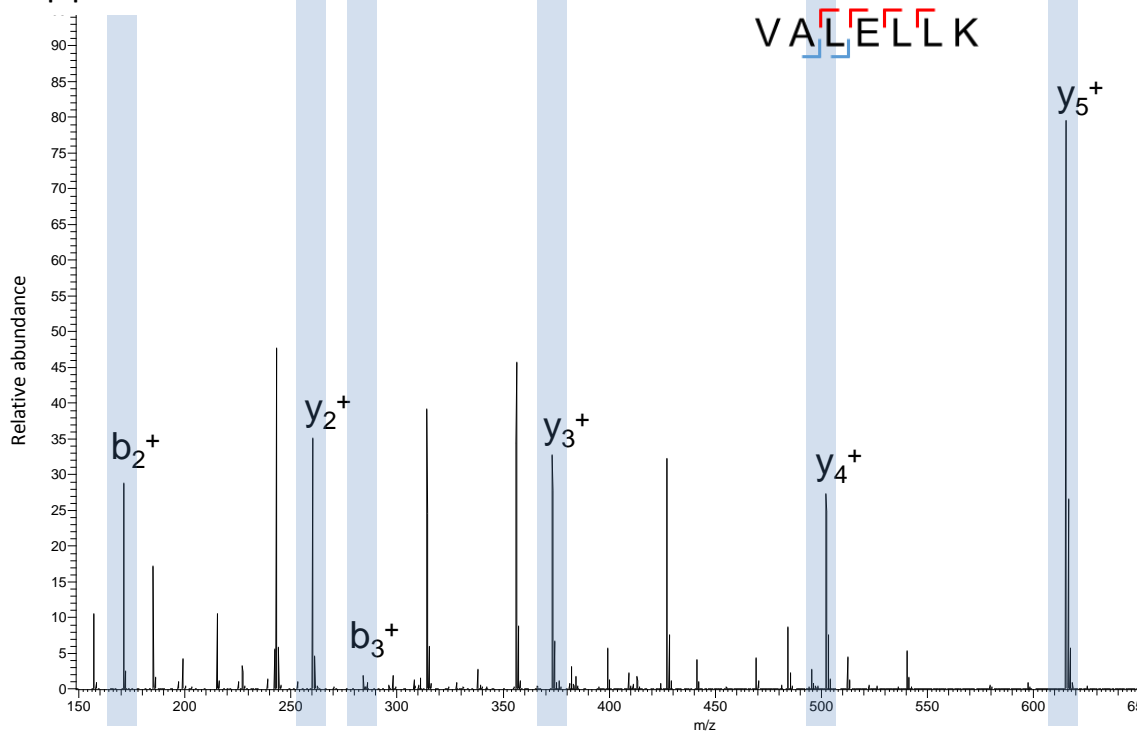

**Supplementary Figure 2: Spectra validation for altRELT<sup>5'</sup>**

Example of validation for altRELT<sup>5'</sup> specific peptide VALELLK. **(a)** Experimental MS/MS spectra (PeptideShaker graphic interface output). **(b)** MS/MS spectra of the synthetic peptide.

Matching peaks are shown with blue masks. A diagram of the transcript with its accession number and the localization of the altORF and the CDS is shown at the top.



AltLINC01420<sup>nc</sup>

70 273

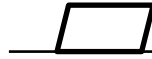

NR\_015367.2

**a. Experimental peptide**

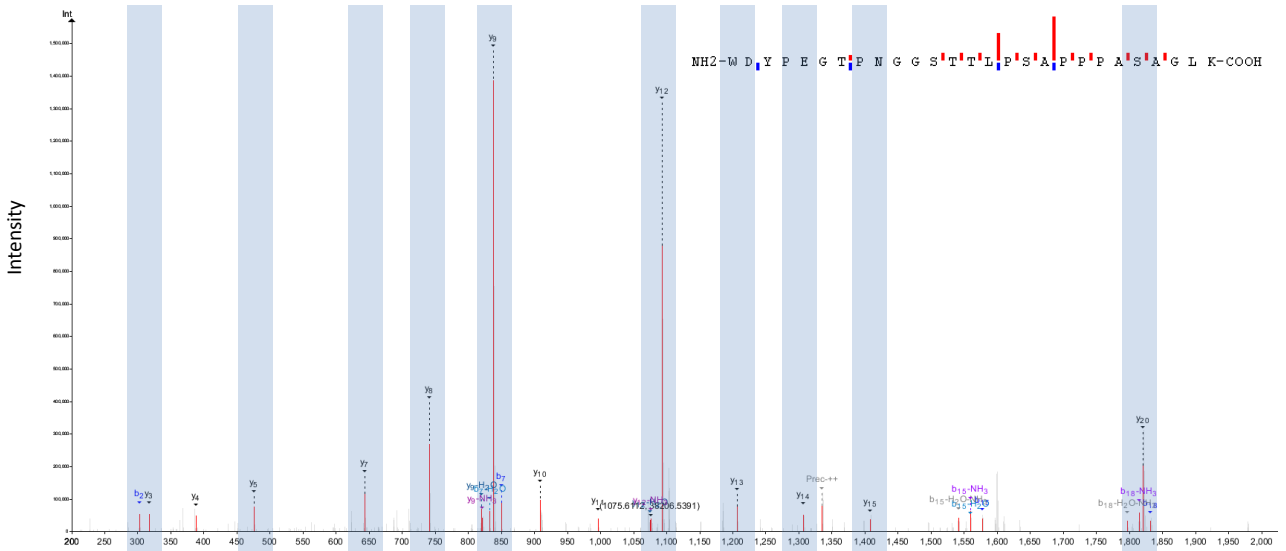

**b. Synthetic peptide**

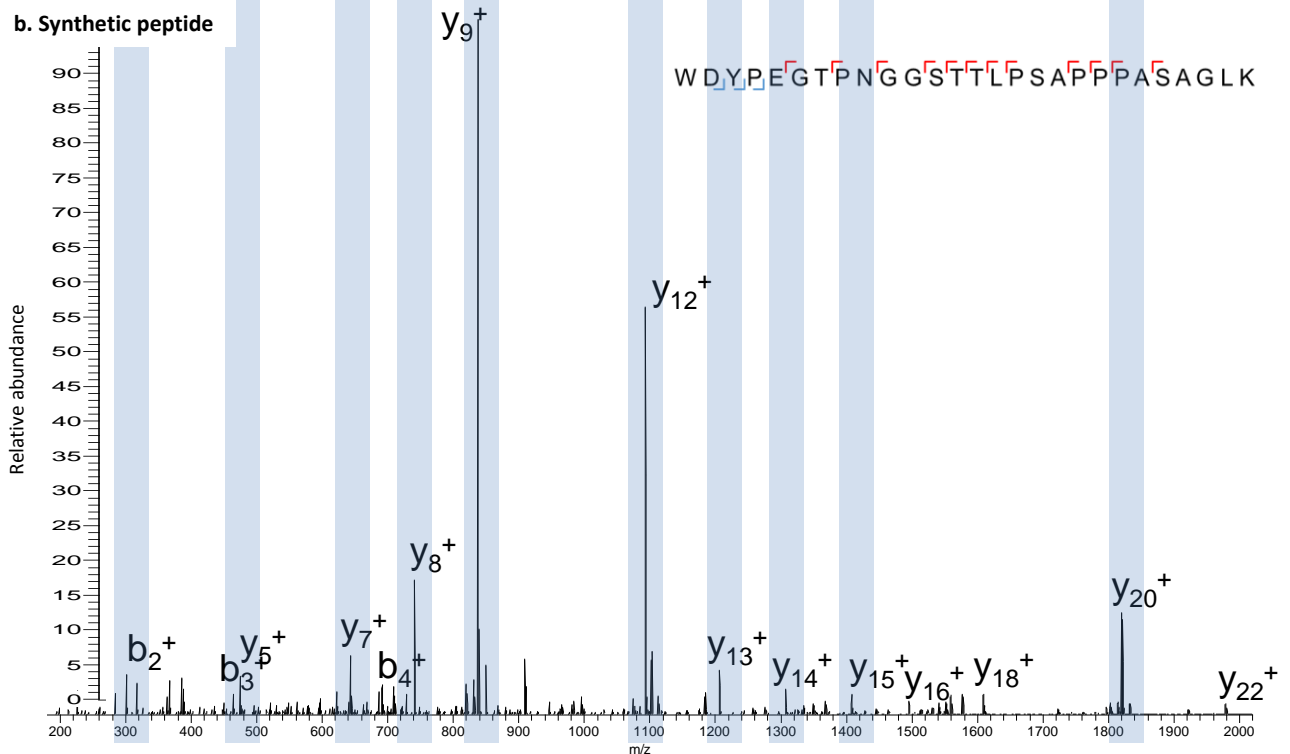

**Supplementary Figure 3: Spectra validation for altLINC01420<sup>nc</sup>**

Example of validation for altLINC01420<sup>nc</sup> specific peptide

WDYPEGTPNGGSTTLPSAPPPASAGLK. (a) Experimental MS/MS spectra

(PeptideShaker graphic interface output). (b) MS/MS spectra of the synthetic peptide.

Matching peaks are shown with blue masks. A diagram of the transcript with its accession number and the localization of the altORF is shown at the top.

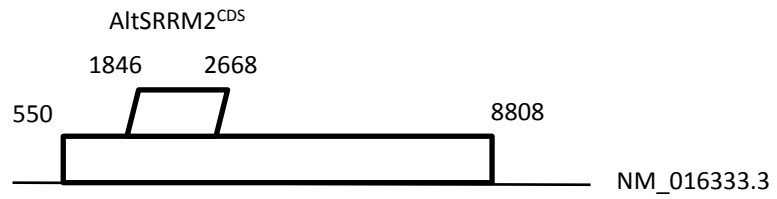

**a. Experimental peptide**

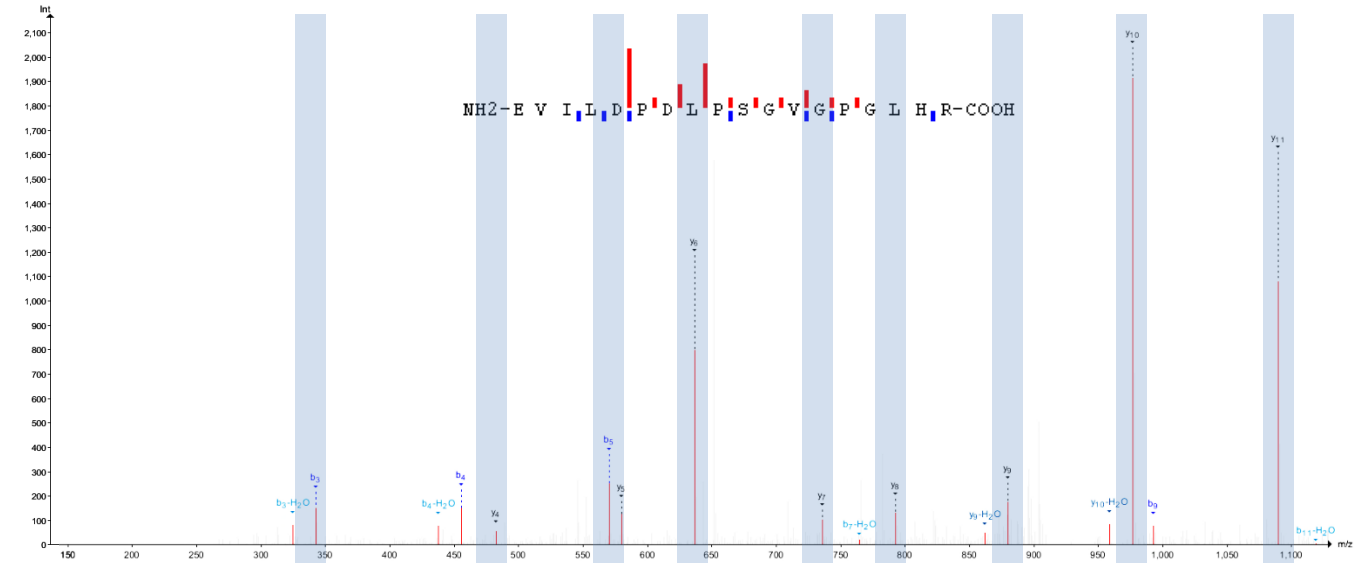

**b. Synthetic peptide**

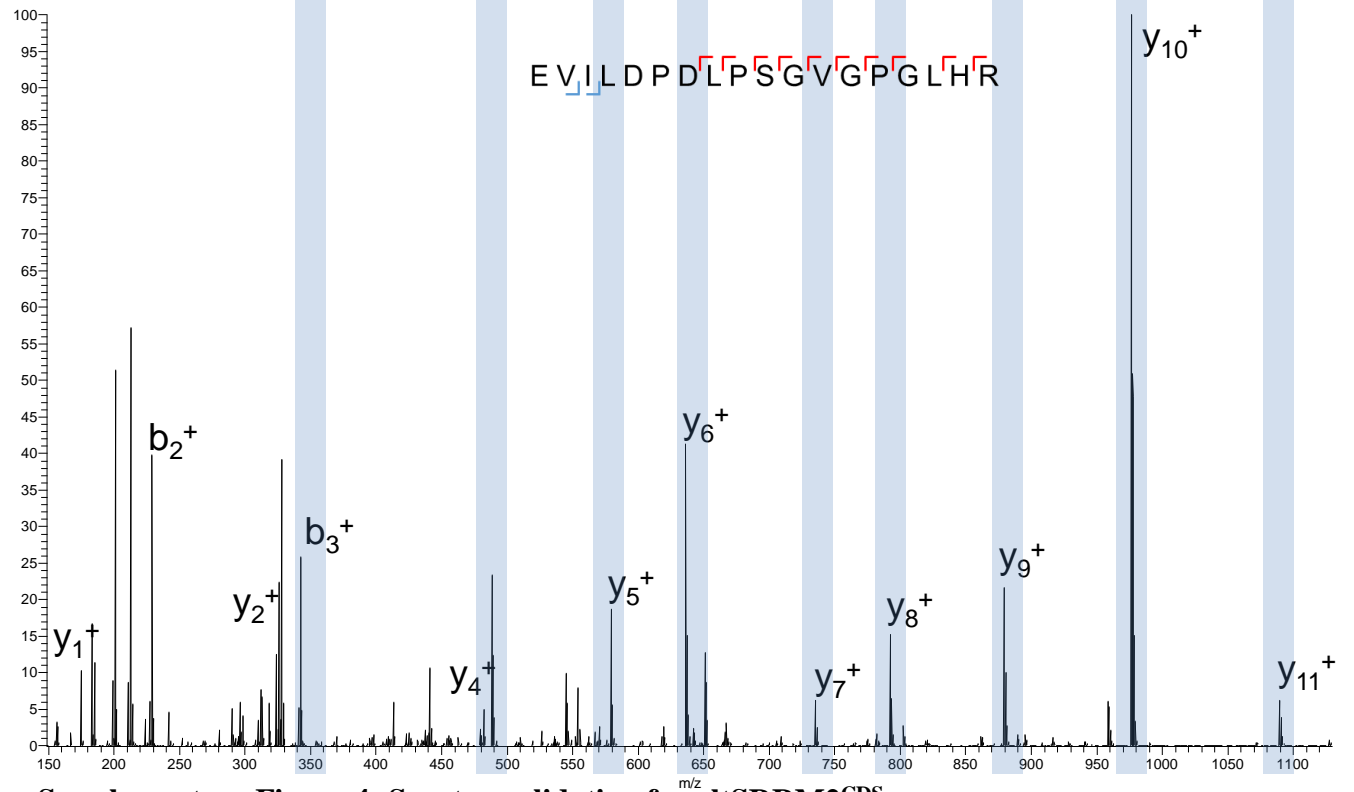

**Supplementary Figure 4: Spectra validation for altSRRM2<sup>CDS</sup>**

Example of validation for altSRRM2<sup>CDS</sup> specific peptide EVILDPDLPSGVGPGGLHR. (a)

Experimental MS/MS spectra (PeptideShaker graphic interface output). (b) MS/MS spectra of the synthetic peptide.

Matching peaks are shown with blue masks. A diagram of the transcript with its accession number and the localization of the altORF and the CDS is shown at the top.
